# 1 **Distinct transcriptomic cell types and neural circuits of the subiculum and prosubiculum along** 2 **the dorsal-ventral axis**

3  
4 Song-Lin Ding<sup>1,2,\*</sup>, Zizhen Yao<sup>1</sup>, Karla E. Hirokawa<sup>1</sup>, Thuc Nghi Nguyen<sup>1</sup>, Lucas T. Graybuck<sup>1</sup>, Olivia  
5 Fong<sup>1</sup>, Phillip Bohn<sup>1</sup>, Kiet Ngo<sup>1</sup>, Kimberly A. Smith<sup>1</sup>, Christof Koch<sup>1</sup>, John W. Phillips<sup>1</sup>, Ed S. Lein<sup>1</sup>,  
6 Julie A. Harris<sup>1</sup>, Bosiljka Tasic<sup>1</sup>, Hongkui Zeng<sup>1</sup>

7  
8 <sup>1</sup>Allen Institute for Brain Science, Seattle, WA 98109, USA

9  
10 <sup>2</sup>Lead Contact

11  
12 \*Correspondence: [Songd@alleninstitute.org](mailto:Songd@alleninstitute.org) (SLD)

## 13 14 **Highlights**

- 15 1. 27 transcriptomic cell types identified in and spatially registered to “subicular” regions.
- 16 2. Anatomic borders of “subicular” regions reliably determined along dorsal-ventral axis.
- 17 3. Distinct cell types and circuits of full-length subiculum (Sub) and prosubiculum (PS).
- 18 4. Brain-wide cell-type specific projections of Sub and PS revealed with specific Cre-lines.

## 19 20 21 22 **In Brief**

23  
24  
25 Ding et al. show that mouse subiculum and prosubiculum are two distinct regions with differential  
26 transcriptomic cell types, subtypes, neural circuits and functional correlation. The former has obvious  
27 topographic projections to its main targets while the latter exhibits widespread projections to many  
28 subcortical regions associated with reward, emotion, stress and motivation.

## 29 30 **Summary**

31  
32 Subicular region plays important roles in spatial processing and many cognitive functions and these  
33 were mainly attributed to subiculum (Sub) rather than prosubiculum (PS). Using single-cell RNA-  
34 sequencing (scRNA-seq) technique we have identified up to 27 distinct transcriptomic clusters/cell  
35 types, which were registered to anatomical sub-domains in Sub and PS. Based on reliable molecular  
36 markers derived from transcriptomic clustering and *in situ* hybridization data, the precise boundaries of  
37 Sub and PS have been consistently defined along the dorsoventral (DV) axis. Using these borders to  
38 evaluate Cre-line specificity and tracer injections, we have found bona fide Sub projections  
39 topographically to structures important for spatial processing and navigation. In contrast, PS along DV  
40 axis sends its outputs to widespread brain regions crucial for motivation, emotion, reward, stress,  
41 anxiety and fear. Brain-wide cell-type specific projections of Sub and PS have also been revealed using  
42 specific Cre-lines. These results reveal two molecularly and anatomically distinct circuits centered in  
43 Sub and PS, respectively, providing a consistent explanation to historical data and a clearer foundation  
44 for future functional studies.

45  
46  
47 **Keywords:** ScRNA-seq, single-cell transcriptomics, subicular complex, prosubiculum, ventral  
48 hippocampus, cell types, connectivity, hippocampal formation, Cre-dependent tracing

49

50  
51  
52  
53  
54  
55  
56  
57  
58  
59  
60  
61  
62  
63  
64  
65  
66  
67  
68  
69  
70  
71  
72  
73  
74  
75  
76  
77  
78  
79  
80  
81  
82  
83  
84  
85  
86  
87  
88  
89  
90  
91  
92  
93  
94  
95  
96  
97  
98

## Introduction

The subicular complex of the hippocampal formation has been reported to play important roles in many brain functions such as learning and memory, spatial navigation, emotion, reward, stress, motivation, and endocrine regulation (Aggleton and Christiansen, 2015; Herman and Mueller, 2006; O'Mara et al., 2009). The subicular complex is also heavily involved in many neurological and psychiatric diseases such as Alzheimer's disease, temporal lobe epilepsy, schizophrenia, autism, anxiety disorder and drug addiction (Coras et al, 2014; Godsil et al., 2013; Van Hoesen and Hyman, 1990). To explore the anatomical substrates of these functions and diseases, neuroscientists have started to pinpoint specific subicular subfields for their cell types, neural circuits, physiological properties, and the effects of lesion or stimulation (Bienkowski et al., 2018; Cembrowski et al., 2018a; Huang et al, 2017; Preston-Ferrer et al, 2016; Tang et al., 2016). An important first step to characterize the subicular subfields is to accurately identify and target these subfields and their cell types.

The subfields of the subicular complex mainly include the prosubiculum (PS), subiculum proper (Sub or S), presubiculum [PrS, including postsubiculum (PoS), i.e. dorsal PrS (PrSd)] and parasubiculum (PaS) (Ding 2013; Rosene and van Hoesen, 1987). The concept of PS was proposed and refined by many neuroscientists (see Lorente de No, 1934; Rosene and Van Hoesen, 1987; Saunders et al., 1988a, b). Many previous studies in monkey have adopted the definition of PS, which is a narrow and oblique region between CA1 and Sub with strong AChE staining (Arikuni et al., 1994; Barbas and Blatt, 1995; Fudge et al., 2012; Saunders et al., 1988b; Wang and Barbas, 2018; Yukie, 2000). However, the term PS has not been fully accepted yet, especially in rodent literature, in which PS was often treated as part of Sub with a dropout of the term PS (see Ding, 2013, for review). Accordingly, inconsistent and even opposite results often exist in PS and Sub studies between monkey and rodent and across different research groups. For example, in some retrograde tracing studies, neurons in PS rather than Sub were shown to project to bed nucleus of stria terminalis (BST) and amygdala when the term PS was used in rat (Christensen and Frederickson, 1998; Howell et al., 1991) and monkey (Fudge et al., 2012; Rosene and van Hoesen; 1987; Saunders et al, 1988; Wang and Barbas, 2018). In contrast, when the term PS was not used, neurons in Sub were reported to project to BST and amygdala in other retrograde tracing studies of the rat (Kishi et al., 2006; Ottersen, 1982; Shi and Cassell, 1999; Veening, 1978; Weller and Smith, 1982). Similar situation was observed for projections from PS and Sub to ventromedial prefrontal cortex [PFvm, including prelimbic (PL) and infralimbic (IL) cortices] and ventral striatum [VS, including nucleus accumbens (ACB) and olfactory tubercle (OT)]. For instance, after retrograde tracer injections into IL or VS, labeled neurons were mostly found in PS (Jay et al., 1989) or in "proximal Sub" (close to CA1; roughly corresponding to PS) rather than in "distal Sub" (close to PrSd) of the rat (Christie et al, 1987; Ishizuka, 2001; Phillipson and Griffiths, 1985; Witter, 2006; Witter et al., 1990). All above findings suggest the existence of PS as a distinct entity from Sub, with distinct outputs. If it is confirmed that PS rather than Sub projects to amygdala, VS, BST and IL, structures heavily involved in emotion, reward, stress and motivation (Aggleton and Christiansen, 2015; Herman and Mueller, 2006; O'Mara et al., 2009; Strange et al., 2014), then it is reasonable to hypothesize that it is PS rather than Sub that plays important roles in these brain functions and related diseases. Clarification of this issue will lead to clearer picture of region- and cell type-specific circuits of PS and Sub, to facilitate more accurate functional studies.

We have taken several approaches in this study to test and verify the hypothesis that PS exists as a distinct region and has distinct cell types and neural circuits in mice. First, we use unbiased hierarchical clustering of scRNA-seq transcriptomic profiles to identify cell types, showing that distinct molecular

99 cell types exist in Sub and PS. Second, using region-specific gene markers we consistently delineate  
100 and update the boundaries of Sub and PS along dorsal-ventral (DV) axis. Third, with these boundaries  
101 as a guide we reveal differential afferent and efferent connections of Sub and PS at whole brain level.  
102 Fourth, utilizing different Cre-lines, we trace brain-wide projections of major cell classes in Sub and  
103 PS. Together, we have systematically linked distinct cell types, molecular signature, connectivity and  
104 anatomy of Sub and PS, and opened the potential to specifically target cell types and related circuits in  
105 future studies to understand related functions and diseases as mentioned above.

106  
107

## 108 **Results**

109

### 110 **Transcriptomic taxonomy of glutamatergic neurons in Sub and PS**

111

112 Since recent molecular and connectional studies had not reached a full consensus regarding cell  
113 types and connectivity patterns of the mouse subicular regions (Bienkowski et al., 2018; Cembrowski  
114 et al., 2018a, 2018b), we first performed a transcriptomic survey of 17,062 glutamatergic cells isolated  
115 from the subicular complex (see Star\*Methods). In addition, the rodent homolog of monkey and human  
116 hippocampo-amygdaloid transition area (HA; see Ding and Van Hoesen, 2015; Rosene and Van  
117 Hoesen, 1987) is also located in this region, mainly ventral to PS (see Allen Mouse Brain Common  
118 Coordinate Framework, CCFv3; Atlas.brain-map.org). We performed two small micro-dissections  
119 (including regions PrS-PoS-PaS and Sub-PS-HA) and a larger one (including all of PrS-PoS-PaS-Sub-  
120 PS-HA) along DV axis of the hippocampal formation (see Star\*Methods and Figure 1A). Cells from  
121 the first two micro-dissections were sequenced with the SMART-Seq v4 method (Tasic et al, 2018),  
122 which only allows small sample sizes and was mainly used for confirmation of the 10X Chromium  
123 clustering results in this study, while those from the larger micro-dissection were sequenced with the  
124 10X Chromium v2 method, which allows much larger sample sizes.

125

126 We performed a consensus clustering to combine the SMART-Seq and 10X datasets. For this study,  
127 we calculated a dendrogram specifically for the glutamatergic class of neurons which include 2,182  
128 SMART-Seq cells and 14,880 10X cells. For visualization, 10X cells were down-sampled to up to 200  
129 cells per cluster (original cluster, OC; Figure 1B). From this dendrogram, based on marker gene  
130 localization (Figure S1A and Table S1) we identified three major branches which correspond  
131 respectively to principal cells in (1) layers 2-3 and 5 of PrS-PoS-PaS and adjoining retrosplenial (RS)  
132 and entorhinal cortex (EC) regions (OC2-22, but not OC23 and OC24), (2) pyramidal cell layer of Sub-  
133 PS-HA and adjoining CA1 (OC23-38) and (3) deepest layers of all related regions (OC39-50). OC1  
134 (for dentate gyrus cells) and OC51 (for Cajal-Ritzius cells) are two outliers (due to imperfect tissue  
135 micro-dissections, cells from neighboring regions are often found in scRNA-seq datasets). OC2-22 of  
136 the first major branch (at the left of Figure 1B), together with OC1 and OC51, were excluded from  
137 further analysis because they do not contain cells from our focused Sub-PS-HA region in this study.  
138 OC23 and OC24 of the first branch were located in the most superficial pyramidal layer of PS (PSpy).  
139 The second major branch (OC25-38) was spatially registered to deep PSp (OC25, OC26), pyramidal  
140 layer of Sub (Spy; OC27-31), superficial pyramidal layer of HA (HApy) and PSp (OC32-35), as well  
141 as pyramidal layer of adjoining CA1 (CA1py; OC36-38). The third major branch (OC39-50) was  
142 spatially registered to polymorphic layer of Sub and PS (Spo and PSp; OC39-41), layer 6 (L6) of all  
143 related regions (OC42-47), and layer 6b (L6b, sometimes called layer 7) of related regions (OC48-50).  
144 Layers 6 and 6b were named because they are continuous with layers 6 and 6b of adjoining cortices,  
145 respectively, and because they are separate from the polymorphic layer at transcriptomic and anatomic  
146 levels (e.g. Figs. 1B; 2S, T; S1G).

147

148 To explore whether more refined clusters could be revealed from the Sub-PS-HA region, we pooled  
149 all cells (n = 8648) from OC23-38 and OC39-44, and performed hierarchical re-clustering (re-cluster,  
150 RC; Figures 1C; S2A). This resulted in 25 clusters in the Sub-PS-HA region, 3 clusters in adjoining  
151 CA1 and one cluster in the deep L6 of PrS (Figures 1C-D; 2A-T; S1B-N). Note that L6b cells (OC48-  
152 50) and L6 cells from the medial and lateral EC (OC45 and OC46) and PrS-PoS (OC47, superficial L6)  
153 were not included in this re-clustering. Compared with the original clustering, re-clustering revealed a  
154 few more clusters/cell types in PSpY and HApY but not in SpY and adjoining CA1py (Table S1).  
155 Interestingly, in both clustering, PSpY is closer (more similar) to CA1py and HApY than to SpY by gene  
156 expression distance (Figure 1B, C). In addition to dendrogram, we also performed tSNE-based  
157 nonlinear dimensionality reduction for visualization of these 29 clusters from re-clustering (see Figure  
158 S2B). Generally, six major subclasses can be identified in the Sub-PS-HA region (Figure 1C and Table  
159 S1), corresponding to SpY (RC1-3), deep PSpY (RC6-8), superficial PSpY (RC10-14), HApY (RC17-  
160 19), most superficial PSpY (RC20-23), Spo and PSpO (RC24-26), and L6 of the Sub and HA (RC28-  
161 29). Cells from two small clusters (RC4, RC5) lie in the superficial pyramidal layer at the border  
162 between ventral Sub and PS. Therefore, taking away adjoining CA1 (RC9, RC15, RC16) and PrSd (i.e.  
163 PoS; RC27) and adding L6b of Sub and PS from original clustering (OC48, OC49), a total of 27  
164 clusters or cell types were revealed in the Sub-PS-HA region. These cell types were partially covered in  
165 the overall “subiculum” region sampled in Cembrowski et al. (2018b). The latter study revealed 8  
166 clusters (with an additional one in CA1) which mainly represent coarse subclasses probably due to a  
167 smaller sample size used (n = 1150 cells) (for comparison of the clusters, see Table S1 and Figure  
168 S2A).

169

## 170 **Anatomical mapping of transcriptomic clusters**

171

172 To facilitate accurate targeting and manipulation of specific cell types, we tried to correlate  
173 transcriptomic clusters with anatomical locations. For this we performed a survey of Allen Brain Atlas  
174 (ABA, Lein et al, 2007) *in situ* hybridization (ISH) dataset using distinct gene markers revealed at  
175 different branch levels (Figures 1D, S1B; Table S1). As shown in Figures 1-3, *Nts*, *Fnl*, *Rxfp1*,  
176 *Adcyap1*, *Gpr101* and *Bcl6* are expressed in most neurons located in anatomically defined SpY region,  
177 while genes such as *Ntng2* and *Syt17* are expressed in most neurons located in PSpY. Newly defined  
178 HA (Allen Mouse Brain CCFv3) also displays region-specific or region-enriched expression of genes  
179 such as *Col23a1*, *Rab3b*, *Id4*, *Abca8a*, *Gpc3*, *Unc5d*, *Lpl* and *Car10* (e.g. Figure S1C-F). HA was  
180 previously treated as ventral Sub or ventral CA1 in rodent (Bienkowski et al., 2018; Paxinos and  
181 Franklin, 2012) but has recently been found to be the homolog of monkey and human HA (Allen  
182 Mouse Brain CCFv3; Ding and van Hoesen, 2015; Rosene and Van Hoesen, 1987). HA is characterized  
183 by densely packed and modified pyramidal neurons in its superficial layer (HApY) and less densely  
184 packed small neurons in its deep layers (HAL6; Figure S1C-F). The polymorphic layers of Sub and PS  
185 (Spo and PSpO, respectively) show region-specific expression of *Ly6g6e*, *Cntn6*, *Pamr1*, *Cbln2* and  
186 *St3gal1* (Figures 1D; 2M, N, Q) while the deeper layer (layer 6) of Sub and HA expresses another set  
187 of region-specific genes such as *Sema3e*, *Thsd7b* and *Nppc* (Figure 3S, T; PS appears to lack this layer  
188 or has only scattered cells). Finally, a layer of cells lined at the gray-white matter border (layer 6b) of  
189 PrSd (i.e. PoS) and Sub were also revealed in this study (Figure S1G).

190

191 Three clusters (RC1-C3) could be further identified in the SpY. RC1 and RC2 correspond to distal  
192 SpY (away from PS) while RC3 to proximal SpY (close to PS). The gene markers for RC1 cells include  
193 *Cntn6*, *Dio3*, *Npsr1*, *Angpt1*, *St8sia2* and *Pdzrn4* while those for RC2 include *Igfbp4*, *Cyp26b1*, *Scn4b*  
194 and *Whrn* (e.g. Figures 1D; S1H, I; Table S1). Representative marker genes in RC3 include *Sntg2*,  
195 *S100b*, *Col6a1*, *Alk* and *Glra3* (Figures 1D; S1J). RC4 is a small cluster with cells located in the  
196 superficial pyramidal layer of the ventral Sub bordering PS and expresses genes *Teddm3*, *Luzp2*,

197 *Galnt14*, *Fam19a1* and *C1ql2* (Figure S1K; Table S1). Another small cluster, RC5 has its cells in the  
198 superficial S-PSpy border region and expresses marker genes *Eps8*, *Dcc*, *Gpr101*, *Cyp26b1*, *Whrn*, *Alk*,  
199 *Gpc5* and *Gira3* (e.g. Figure S1L-N; Table S1).

200  
201 In contrast to Spy, PSpY contains many subtypes (12 clusters), representing highly heterogeneous cell  
202 types which often show laminar organization (Table S1; Figures 2; S3). RC6-8 and RC10-14 represent  
203 deep (PSpy-de) and superficial PSpY (PSpy-su2), respectively, while RC20-23 were mapped to the  
204 most superficial PSpY (PSpy-su1; Figures 2G-L; S3). *Cbln4* and *Nos1* are the representative gene  
205 markers for PSpY-su1 (RC20-23; see Figure S3B-F), which is generally located superficial to PSpY-su2  
206 (RC10-14). The latter expresses another set of genes such as *Dlk1* and *Col25a1* (Figure S3G-K, S-U).  
207 This is consistent with the non-overlapping expression of *Cbln4* and *Dlk1* reported in a recent study  
208 (Cembrowski et al., 2018b). However, some genes (e.g. *Tgfb2* and *Satb2*) are expressed in both groups  
209 (e.g. Figure S3A, L-P). Moreover, gene expression difference along DV axis is detected in the PSpY-de  
210 group (RC6-8). For example, *S100b* and *Slc17a6* tend to be expressed strongly in dorsal portion (RC8;  
211 Figures 1D; 2G; 2S) while *Syt10* and *Mgp* tend to be expressed strongly in the ventral portion of PSpY-  
212 de (RC6-7; Figure S3A). In PSpY-su1 (RC20-23) and PSpY-su2 (RC10-14) subclasses, differential  
213 gene expression along DV axis is also found (see Table S1).

214  
215 Genes selectively or predominantly expressed in PSpO (RC24; e.g. *Cacng5*, *Htr2c*, *Trhr* and *Gdpd2*)  
216 or SpO (RC25-26; e.g. *Plcb4*, *Pirt*, *Abi3bp* and *Pdzrn4*) were also observed, although more genes were  
217 expressed in both PSpO and SpO (Figures 1D, 2M-S). The latter genes include *Pamr1*, *Cbln2*, *Ly6g6e*,  
218 *Chrm2*, *Tle4*, *Kcnmb4*, *St3gal1*, *Trp53i11* and *Drd1a* (e.g. Figure 2M, N, Q). Finally, genes expressed  
219 in L6 (RC 28-29) and L6b (OC48-49) of Sub, PS and HA were often seen to extend to adjoining PrS  
220 (RC27, OC50) and EC. L6 cells express genes such as *Sema3e*, *Thsd7b*, *Car10* and *Nppc*, and HA has  
221 the thickest L6 which selectively or predominantly expresses genes *Sema3d*, *Foxp2*, *Thsd7b* and *Car10*  
222 (e.g. Figures 1D; 2T; S1F). L6b is just a single cell layer at the gray-white matter border expressing  
223 *Nxph4*, *Cplx3* and *Ctgf* (e.g. Figure S1G).

224

## 225 **Precise borders, topography and extent of Sub and PS**

226

227 The borders of Sub, PS, HA and adjoining CA1 were not consistently defined previously in  
228 literature and commonly used brain atlases (e.g. Bienkowski et al., 2018; Cembrowski et al., 2018b;  
229 Paxinos and Franklin, 2012). Since we identified reliable and differential markers for these regions at  
230 transcriptional level, we next delineated precise boundaries between these regions along their DV axis  
231 with a combined use of the identified selective gene markers in sequential coronal (Figure 3) and  
232 sagittal (Figure S4) sections. For convenient description, Sub, PS and CA1 are roughly subdivided into  
233 dorsal (d) and ventral (v) parts since no clear markers are available for the DV borders. In coronal  
234 sections, the DV border between Sub and PS was placed at the dorsal edge of the most caudal PS (for  
235 Sd and Sv, see Figure 3K) or at the dorsal edge of the most caudal CA1 (for PSd and PSv, see Figure  
236 3H). The locations of Sd, PSd, CA1d, Sv, PSv and CA1v as well as their topography were shown on  
237 sequential coronal sections stained for *Nts* (Figure 3A-M) and *Ntng2* (Figure 3N-R), which show  
238 complementary expression patterns. Sd medially adjoins granular part of the retrosplenial cortex (RSg)  
239 at dorsorostral levels (Figure 3A-E) and PrSd at ventrocaudal levels (Figure 3F-K). Laterally, Sd  
240 adjoins PSd at rostradorsal levels (Figure 3A-H) and PSv at caudoventral levels (Figure 3I-K). Sv  
241 adjoins PrSv medially, PSv rostrally, LEC laterally and MEC caudally (Figure 3K-M). PSd is located  
242 lateroventral to Sd and mediodorsal to CA1d, while PSv is located rostral to Sv and ventral to CA1v.  
243 Both CA1v and PSv are connected with cortical amygdalar nucleus via HA (Figures 3E-H and S4A, G-  
244 I). From dorsorostral to ventrocaudal levels, the width and extent of Sub decreases while that of PS  
245 increases. Based on the present delineation it is surprising to find that the previously defined Sv in fact

246 belongs to PSv (see the region marked with \*\* in Figure 3I, J, N, and O), because this region expresses  
247 many typical PS (e.g. PSd) genes including *Ntng2*, *Calb1*, *Nnat*, *Syt17* and *Adra1a* but not typical Sub  
248 (e.g. Sd) genes revealed in this and recent studies (Bienkowski et al., 2018; Cembrowski et al., 2018).  
249 The real Sv only appears at the most caudal levels of the coronal sections (Figure 3K-M, P-R). Finally,  
250 it is also worth mentioning that the borders between Sub and PS and between PS and CA1 are oblique  
251 with variable orientation at different levels (Figure 3A-M), making it very difficult to restrict neuronal  
252 tracer or drug injections in only one region. All these findings were confirmed in sequential sagittal  
253 sections stained for *Calb1* ISH (marker gene for PS, Figure S4A-H) and *Bcl6* ISH (marker gene for  
254 Sub, Figure S4I-O). Finally, it is interesting to find that PSv and Sv occupy the superficial and deep  
255 pyramidal layers, respectively, at level H (*Calb1*) or level P (*Fnl1*, another marker for Sub, Figure S4P)  
256 of the sagittal sections.

257

## 258 **Distinct brain-wide projection patterns of the Sub and PS**

259

260 To determine whether the Sub and PS have overall similar, distinct or mixed projection patterns,  
261 we compared brain-wide projection targets of Sub and PS by separating Sub- and PS-injected cases.  
262 Since most of previous connectional studies used wild-type animals and traditional neuronal tracers, we  
263 have mostly made use of Cre-driver mice (Table S2) in this study to avoid potential fibers of passage  
264 issue and to make evaluation of injections and interpretation of results easier. As expected, it is  
265 extremely difficult to restrict anterograde tracer injections (rAAV, see Methods) in Sub or PS of wild-  
266 type mice without leakage into adjoining PS or Sub. Among many cases with injections involving Sub  
267 of wild-type mice, we identified only 4 cases with injection sites mainly in the Sub (but not in PS)  
268 (Table S2). However, in Cre-driver mice, selectively targeting Sub is much easier. For example, in  
269 *Trib2-F2A-CreERT2* and *Grik4-Cre* mice, where the gene driving Cre is expressed only in Sub but not  
270 PS (e.g. Figure 2B), the effective injection site would only be in Sub even if the injection covers both  
271 sub and adjoining PS because Cre-dependent GFP expression is only present in Cre-expressing  
272 neurons. In this study, we identified 16 Cre-mice with effective injection sites in Sub but not PS. The  
273 overall distribution of labeled axon terminals in the target regions of Sub injections is shown in Table  
274 S2. Briefly, Sd injections resulted in strong axon terminal labeling in RSg, PaS, PrS, Pro, MEC, MM,  
275 AV, AM and Re with weaker labeling in LS (e.g. Figures 4A, S5A1-I1; Table S2; for regional  
276 terminology and abbreviations see Table S3). In Sv-injected cases, labeled axon terminals were clearly  
277 found in the same target regions as in Sd cases (but at differential DV locations except in Re): RSg,  
278 PaS, PrS, Pro, MEC, AV, AM, MM (strong), Re and LS (weaker) (Figures 4B-D; 5A-O; S5A2-I2). In  
279 Re, projections from both Sd and Sv converge in the dorsolateral part (Figure S5J1 & J2). In all Sub-  
280 injected cases, no or few labeling was detected in PL-IL, PRC, VS (ACB+OT), BST, AON, AOB,  
281 amygdaloid nuclei and most of the hypothalamic regions excluding MM (Figures 4, 5, S5; Table S2).  
282 Taken together, the main targets of Sub include RSg, PaS, PrS, Pro, MEC, AV, AM, MM and Re (target  
283 set A).

284

285 A total of 12 PS-injected cases were selected and analyzed in this study. The injection sites in these  
286 cases were localized in PSd and PSv (but not in Sub) with or without involvement in other adjoining  
287 regions (Table S2). In 3 PSd cases, labeled axon terminals was clearly seen in IL, LEC, VS, LS, AON,  
288 and amygdala (Figure 4E) with few in PRC, Re and hypothalamus. In 9 PSv cases, strongly labeled  
289 axon terminals were observed in IL-PL, LEC, VS, LS, AON, amygdala, PRC, BST, PaT, PT, Re and  
290 hypothalamic nuclei (Table S2; Figures 4F-H, L, M; 6) with much less labeling in MEC and MM. In  
291 Re, the labeled terminals were concentrated in ventromedial portion (Figure 6K). In *Drd3-Cre\_KI196*,  
292 *Vipr2-Cre\_KE2* and wild-type cases, labeled axon terminals were also observed in AM but not in AV  
293 (Figure 4F, H). In one *Syt17-Cre\_NO14* case, strong terminal labeling was seen in AOB (Figure 6F)  
294 although in other cases the labeling in AOB was very weak and sparse. In all 12 PS cases, no or few

295 terminal labeling was detected in the main target regions of Sub (i.e. RSg, PrS, Pro and AV). Overall,  
296 the main targets of PS include IL, LEC, VS, LS, AON, PRC, BST, PaT, PT, Re, amygdala, and  
297 hypothalamic nuclei (target set B; Tables S2 and S4).

298

### 299 **Cell type-specific projections of Sub and PS**

300

301 As demonstrated above, both Sub and PS have at least two major excitatory neuronal subclasses  
302 located in pyramidal and polymorphic cell layers, respectively. Here we explore if these two cell  
303 subclasses have different projection patterns. We first examined the Cre-mice with Sub injections and  
304 divided them into two groups: one with effective injections in both Spy and Spo and another only in  
305 Spy (Table S2). In the former group (e.g. *Trib2-2A-CreERT2*, *Grm2-Cre\_MR90* and *Slc17a6-IRES-*  
306 *Cre* lines; Figures 4C; S6T-W), labeled axon terminals were seen in RSg, PrS, PaS, MEC, MM and Pro  
307 (target set A1) as well as in AV, AM and Re (target set A2). In the latter group, however, the labeled  
308 axon terminals were only seen in target set A1 (e.g. *Grik4-Cre* line, Figure 4B), indicating that target  
309 set A2 is mainly innervated by Spo rather than Spy. Consistently, in cases with injections mostly  
310 restricted in Spo, labeled axon terminals were mostly observed in target set A2 (e.g. *Plxnd1-Cre\_OG1*  
311 and *Drd1a-Cre\_EY262* lines; Figure S6R, S; Table S2). Interestingly, the most distal portion of Spo  
312 (close to PrS) appears to project to AV but not AM, indicating that AM is mainly innervated by more  
313 proximal part of Spo. In fact, when an injection was restricted in the most distal portion of Spo in Sd of  
314 a *Slc17a7-IRES-Cre* mouse, labeled axon terminals were only seen in AV and not in AM (Figure S6Y).  
315 These are coincidental with our transcriptomic finding that Spo contains two clusters (RC25-26), which  
316 might innervate AV and AM, respectively. By comparing terminal labeling in Re of *Trib2-2A-CreERT2*  
317 and *Slc17a7-IRES-Cre* mice, it is obvious to find that Re receives inputs from *Slc17a7-Cre* but not  
318 *Trib2-Cre* neurons. The Re inputs appear to derive mainly from Spo with less from Spy since strong  
319 terminal labeling was observed in Re of *Grm2-Cre\_MR90* mouse, in which *Grm2* is predominantly  
320 expressed in Spo (Figure S6E, T). Consistently, much weaker terminal labeling was observed in Re of  
321 *Grik4-Cre* and *Scnn1a-Tg3-Cre* mice, in which *Scnn1a* is predominantly expressed in Spy with less in  
322 Spo (e.g. Figure S6F, U).

323

324 We also found that PSp<sub>py</sub> and PSp<sub>po</sub> have different projections patterns. Only injections contained in  
325 PSp<sub>po</sub> resulted in terminal labeling in the thalamic nuclei AM and Re although PSp<sub>py</sub> projects to a wide  
326 range of brain regions (see above section). For example, no labeled axon terminals were found in AM  
327 and Re in *Syt17-Cre\_NO14*, *Ntng2-IRES2-Cre*, *Calb1-T2A-dgCre* and *Ppp1r17-Cre\_NL146* mice (e.g.  
328 Figure 4E, G, L), in which the gene driving Cre is not expressed in PSp<sub>po</sub> (Figures 1D; 2S). On the other  
329 hand, clear projections to AM and Re were observed in *Drd3-Cre\_KI186* and *Vipr2-Cre\_KE2* mice  
330 (Figure 4F, H), in which the gene driving Cre is expressed in PSp<sub>po</sub> (Figure S6G, H). Another interesting  
331 finding was that PS (both PSp<sub>py</sub> and PSp<sub>po</sub>) did not project to AV, which instead received strong inputs  
332 from Spo. It is also worth mentioning that axon projections to PaT-PT were detected in *Syt17-*  
333 *Cre\_NO14*, *Ntng2-IRES2-Cre*, *Calb1-T2A-dgCre* (PSpo negative; Figure 4G, L) but not in *Slc17a6-*  
334 *IRES-Cre* (PSpo positive; Figure S6X) mice, indicating that these projections likely originate from  
335 PSp<sub>py</sub> with no or few projections from PSp<sub>po</sub>.

336

337 We used *Slc17a6-IRES-Cre* (expression in PSp<sub>py</sub>-de), *Calb1-T2A-dgCre* (expression mainly in  
338 PSp<sub>py</sub>-su) and *Ntng2-IRES2-Cre* lines to compare the projection patterns of these cell types in PSp<sub>py</sub>. In  
339 *Slc17a6-IRES-Cre* mice with injections involving both Sub and PS, heavy projections to LS, VS and  
340 anterior hypothalamic region were detected (Figure S6X), in addition to the projections to major Sub  
341 targets (i.e. target set A: RSg, PrS, PaS, Pro, MEC, AV, AM, Re and MM). These results indicate that  
342 PSp<sub>py</sub>-de gives rise to strong projections to LS, VS and anterior hypothalamus since injections restricted  
343 in Spy of *Slc17a6-IRES-Cre* mice resulted in no or few terminal labeling in those three targets (Figure

344 S6V, W). Interestingly, in all *Slc17a6*-IRES-Cre mice with injections contained in PSp<sub>py</sub>-de, no or few  
345 terminal labeling was observed in the amygdala (Fig. S7A-C). This indicates that PSp<sub>py</sub>-de neurons  
346 expressing *Slc17a6* do not project to amygdala. In contrast, in *Calb1*-T2A-dgCre mice, heavy  
347 projections to LS, VS and amygdaloid nuclei (mainly BL) were observed with no or few labeling in  
348 hypothalamus (Fig. S7D-F; Table S2), suggesting some PSp<sub>py</sub> projections to amygdala originate from  
349 *Calb1* expressing neurons in PSp<sub>py</sub>-su. In *Ntng2*-IRES2-Cre mice, where the gene driving Cre is  
350 expressed in both PSp<sub>py</sub>-su and PSp<sub>py</sub>-de, dense axon terminals were found in all PS target regions (i.e.,  
351 target set B) including BL, BM and many other amygdaloid nuclei (Fig. S7G-I; Table S2). This  
352 suggests that *Ntng2* expressing neurons in PSp<sub>py</sub>-de project to BM while those in PSp<sub>py</sub>-su project to  
353 BL.

### 354 355 **Topographic rather than differential projections of the Sub along DV axis**

356  
357 With reliably defined Sub boundaries we next aim to examine and compare the main targets of Sub  
358 to clarify if topographic and/or differential projections of Sub exist along DV axis.  
359 rAAV injections restricted in either Sd or Sv resulted in axon terminal labeling in essentially the same  
360 set of target regions (i.e., target set A: MEC, RSg, PrS, PaS, LS, AV-AM, and MM). However, the  
361 terminals were differentially distributed in their target regions. For example, labeled axon terminals  
362 from Sd were detected in the most rostradorsal part of RSg, the most dorsal part of LS, PrS and PaS,  
363 the most dorsorostral part of MM and the most dorsolateral part of MEC (Figure S5A1-I1) as well as in  
364 the most caudolateral AM-AV (Figure S8C0-C4). Labeled terminals from Sv were observed in the most  
365 caudoventral part of Rsg, the most ventral part of LS, PrS and PaS, the most ventrocaudal part of MM  
366 and the most ventromedial part of MEC (Figure S5A2-I2) as well as in the most rostromedial AM-AV  
367 (Figure S8E0-E4). When the injections were placed in intermediate portion of Sub, labeled axon  
368 terminals were distributed in the regions between those derived from the most dorsal and most ventral  
369 parts of Sub (Figure S8D0-D4). In brief, Sub displays topographic rather than differential projections to  
370 their major targets along DV axis (i.e. target set A; Table S4), with the exception of Re where the axon  
371 terminals from both Sd and Sv appear to converge (Figure S5J1, J2). In Bienkowski et al. (2018),  
372 dorsal and ventral Sub were reported to project to target sets A and B, respectively.

### 373 374 **Differential and topographic projections of PS along DV axis**

375  
376 Since differential projections of Sub along the DV axis were not observed, we hypothesize that the  
377 DV difference of the projections from loosely defined “Subiculum” reported in literature probably  
378 originated from PS. Thus, we compared terminal distribution in the main target regions of PSd and PSv  
379 (Figures 4 and S8). PSv heavily projects to LEC, LS, VS, the amygdala and many hypothalamic nuclei;  
380 moderately to PRC, IL, AM, PT, PaT, AON, MM, and BST. In contrast, terminal labeling originated  
381 from PSd was much less dense in above-mentioned PS target regions such as LS, VS, LEC, and  
382 amygdala, and almost absent in other target regions such as IL, BST, AON, MM and hypothalamus  
383 (Table S2).

384  
385 In addition to differential DV projections, topographic projections were also observed from PS to  
386 some target regions such as AM, IL, LS, VS, and BL of the amygdala. Specifically, PSd projects to  
387 caudolateral AM (Figure S8A0-A4), ventral IL, dorsomedial LS, lateroventral VS (Figure S9A-D), and  
388 lateral BL (Figure S9I-K). In contrast, PSv projects to rostromedial AM (Figure S8B0-B4), dorsal IL,  
389 ventrolateral LS, mediadorsal VS (Figure S9E-H), and medial BL (Figure S9L-N).

### 390 391 **Efferent projections of adjoining CA1 and MEC**

392



393 Given that PS is next to CA1, we next examined the efferent projections of CA1 compared to those  
394 of PS and Sub. CA1d projects strongly to Sd, MEC and dorsal LS, lightly to PSd but not to LEC, VS  
395 and the amygdala (Figure 4I). However, CA1v projects strongly to Sv, PSv, MEC and ventral LS with  
396 weak projections to IL, PRC and caudal hypothalamus as well as to LEC, IL, AON, VS and the  
397 amygdala (Figure 4J, K; all are also the targets of PSv). In cases with injections also including  
398 adjoining PSv (e.g. Figure 4L), heavy terminal labeling was observed in IL, AON, VS, LS, LEC, and  
399 the amygdala with moderate labeling in BST, PRC, PT and caudal hypothalamus. In all cases, no  
400 labeling was found in target regions of Sub such as RSg, Pro, PrS, PaS, MM, and AV. Therefore, CA1v  
401 displays a similar projection pattern but with much less density and intensity when compared to PSv  
402 (Figure 4I-L; Table S2). In addition, CA1v projections to the amygdala mainly target BL with few to  
403 other amygdaloid nuclei.

404  
405 As shown in Figure S4, Sv adjoins MEC caudally via a thin layer of white matter. To determine if  
406 MEC projects to some Sub or PS target regions we examined 6 cases with injections restricted in MEC.  
407 In two *Cux2*-IRES-Cre and two *Slc17a6*-IRES-Cre cases in which the gene driving Cre expression was  
408 restricted to layers 2-3 of MEC, the injections contained only MEC (but not Sv) and resulted in heavily  
409 labeled terminals in the molecular layer of LEC, DG, CA1, Sv and PaS with light labeling in AON, IL  
410 and OT. In 3 wild-type cases (Table S2), however, the injections also contained layers 5-6 of MEC and  
411 resulted in heavy terminal labeling in postrhinal cortex, caudate putamen, amygdala (mainly BL and  
412 Ahi), amygdalo-striatal transition area, AV, LD, NLOT, VS, and claustrum with lighter labeling in the  
413 hypothalamus. Therefore, previously reported Sv projections to the amygdala, LD, VS and  
414 hypothalamus may instead be derived from MEC that may be contained in Sub injections.

#### 415 416 **Brain-wide differential afferent projections to Sub and PS**

417  
418 Since Sub and PS have differential efferent projection targets, we next examined whether Sub and  
419 PS receive differential afferent inputs. Amygdala projects to PSv with no labeling in Sv (Figure S10A-  
420 D). Dorsal and ventral CA3 project to PSd and PSv, respectively, with no projections to Sub (Figures  
421 S7J-M; S10I, J). LEC projections mainly target PS rather than Sub [in the Sub, mainly fibers rather  
422 than axon terminals were observed (Figure S10E-H)]. Injections in Re result in strong terminal labeling  
423 in PSv with much fewer labeling in Sub (Figure S10K, L). In contrast to LEC injections (Figure S10G,  
424 H), ventral MEC injections resulted in heavy terminal labeling in Sv with much fewer labeling in PSv  
425 (Figure S10M, N); in PSv, mostly fibers rather than terminals were observed. Interestingly, dorsal MEC  
426 tends to project to Sd with no labeling in Sv (Figure S10P). Finally, AV of the thalamus projects to Sub  
427 rather than PS and the labeled terminals are distributed in both dorsal Spo (Figure S10O) and ventral  
428 Spo (not shown). Quantitative analysis reveals that Sub receives its inputs mainly from MEC, PrS and  
429 AV, in addition to heavy CA1 inputs, while PS mainly receives its inputs from amygdala, LEC, CA3,  
430 Pir and Re, in addition to heavy CA1 inputs (Figure S10V).

#### 431 432 433 **Discussion**

434  
435 The present study, for the first time, has identified 27 transcriptomic clusters/cell types in the “Sub”  
436 regions which include Sub, PS and HA. Using gene markers for specific cell types in these three  
437 regions we have accurately delineated the borders between them along full DV axis and found for the  
438 first time that the dorsal and ventral “Sub” regions are occupied mainly by Sub and PS, respectively  
439 (see Figures 7A-C and S11A-D for summary). These findings are critical to accurate and consistent  
440 localization of neurons and injections as well as data interpretation. With these findings we have  
441 demonstrated that both dorsal and ventral Sub project to the same target regions with topographic

442 organization. This challenges traditional concept that dorsal and ventral Sub have differential  
443 projections. Furthermore, we have found the most ventral “Sub” region actually belongs to ventral PS  
444 and displays strong connections with structures critical to motivation, emotion, reward, stress, anxiety  
445 and fear. The distinction and DV difference in sizes of Sub and PS along DV axis also enable consistent  
446 interpretation of anatomic, molecular, functional and behavioral results in the literature and in different  
447 species.

448  
449 In addition to these major findings, other new findings of the present study include (Figure 7A, B):  
450 1. PS projects to claustrum/endopiriform nucleus and accessory olfactory bulb; 2. Sub but not PS  
451 projects to area prostriata (Pro; see Lu et al., 2020), which is heavily involved in spatial processing; 3.  
452 Sub projects to both AV and AM while PS only to AM; 4. Sub projects to dorsolateral Re while PS to  
453 ventromedial Re; 5. CA3 projects to PS but not to Sub; 6. Many projection patterns of different cell  
454 types of Sub and PS using many different Cre-lines.

### 455 456 **Transcriptomic cell types of excitatory neurons in Sub and PS**

457  
458 Cembrowski et al. (2018b) recently explored the transcriptomic cell types of excitatory neurons in  
459 the subiculum regions using scRNA-seq. With a relatively small sample size (n = 1150 cells), they  
460 observed 8 clusters (with an additional one in CA1: C7). In comparison, our study revealed 27 clusters  
461 with a sample size of 8648 cells from the same subicular regions. Based on our confusion matrix  
462 analysis and the marker genes, the 9 clusters in the previous study can be mapped and partially overlap  
463 with the overall 29 clusters revealed in this study (see Figure S2A and Table S1). In this study, 9, 14  
464 and 4 clusters or cell types are found within Sub proper, PS and HA, respectively. PSp<sub>1</sub> neurons are  
465 found to be highly heterogeneous. Cells in PSp<sub>1</sub>-su1 (the most superficial portion) are closer (i.e. more  
466 similar at transcriptional level) to the neurons in HAp<sub>1</sub>, and PSp<sub>1</sub>-su2 closer to PSp<sub>1</sub>-de. Both PSp<sub>1</sub>-  
467 su2 and PSp<sub>1</sub>-de (but not Sp<sub>1</sub>) are closer to CA1p<sub>1</sub>. Overall, at transcriptional level, PSp<sub>1</sub> is closer to  
468 CA1p<sub>1</sub> rather than to Sp<sub>1</sub>, supporting our conclusion that Sub and PS are two distinct entities with  
469 differential molecular architecture, neural circuits and functional correlation (see below for further  
470 discussion). In summary, our systematic and refined cell-type identification of Sub and PS could serve  
471 as the base for accurate targeting and manipulation of specific subsets of the circuits in future studies.

### 472 473 **Molecular dissection of Sub and PS and their borders**

474  
475 Although monkey PS could be clearly identified with help of AChE stain by many researchers  
476 (Barbas and Blatt, 1995; Blatt and Rosene, 1998; Ding, 2013; Fudge et al., 2012; Rosene and van  
477 Hoesen, 1987; Sounders et al, 1988b; Yukie, 2000), reliable and precise identification of rodent PS has  
478 proven to be very difficult due to the curvature of the hippocampus and the lack of reliable markers.  
479 Consequently, the PS region has been treated as part of Sub in most rodent literature. However, the  
480 existence of distinct rodent PS has been re-emphasized recently based on a combined analysis of  
481 comparative, connectional, neurochemical and molecular data (Ding, 2013). In the present study, we  
482 have registered unbiased transcriptional cell type classification to anatomical regions and found that the  
483 general “subiculum” contains at least three distinct regions: PS, Sub proper and HA. Furthermore, the  
484 borders, extent and topography of Sub, PS and HA along DV axis are consistently and reliably defined  
485 based on distinct molecular markers revealed from the transcriptome. We have further uncovered that  
486 the sizes (widths) of Sub and PS decrease and increase respectively along DV levels (see Figures 3, S4  
487 and 7C) and that Sub and PS display generally distinct afferent and efferent projections (Figure 7A, B).

488  
489 Based on these findings, many confusing and conflicting results in previous rodent studies can be  
490 explained with the introduction of the PS concept and the precise and reliable demarcation of its

491 borders. For example, we found that the region previously labeled as ventral Sub in most rodent  
492 literature in fact is the ventral PS because it expresses transcriptionally identified marker genes for PS  
493 rather than those for Sub (see Figures 3 and S4; Table S1). Consistent with this conclusion, this region,  
494 although called “ventral Sub”, was found to project to IL, VS, AON, BST, PRC and many amygdaloid  
495 and hypothalamic nuclei (Bienkowski et al., 2018; Cullinan et al., 1993; Kishi et al., 2006; McDonald,  
496 1998; Swanson and Cowan, 1977), all of which are typical target regions of PS revealed in the present  
497 study. Thus, previously reported projections from “ventral Sub” to above target regions mostly  
498 originate from ventral PS. Since these target regions are strongly associated with functions such as  
499 motivation, emotion, reward, stress, anxiety and fear (Aggleton 2012; Andrzejewski et al, 2006;  
500 Herman and Mueller, 2006; O’Mara et al., 2009; Potvin et al., 2006; Subhadeep et al., 2017), We  
501 conclude here that it is PS rather than Sub predominantly projecting to the structures critical for  
502 motivation, emotion, reward, stress, anxiety and fear.

503  
504 Many previous studies in rodent divided the “Sub” (mainly the dorsal “Sub”) into distal and  
505 proximal “Sub” instead of Sub and PS (see Figure S11 for summary, and Aggleton, 2012; Aggleton and  
506 Christiansen, 2015; Witter, 2006 for reviews). The distal and proximal “Sub” were originally used to  
507 describe the locations of injection sites and labeled neurons in the dorsal “Sub” (e.g. Naber and Witter,  
508 1998; Witter, 2006; Witter et al., 1990). Thus, the “Sub” region closer to CA1 was named proximal  
509 “Sub” while that away from CA1 named distal “Sub” with no specific markers used to demarcate the  
510 borders. Recently selected gene markers were introduced to mark the distal and proximal “Sub” (S-dis  
511 and S-pro, respectively) (Cembrowski et al., 2018a, 2018b) or Sub and PS (Bienkowski et al., 2018;  
512 Ding, 2013), mostly for dorsal “Sub”. Connectivity data appear to support this subdivision of the dorsal  
513 “Sub” (e.g. Bienkowski et al., 2018; Cembrowski et al., 2018a; Witter, 2006). However, in the ventral  
514 part of the “Sub” region, distal and proximal “Sub” do not appear to be dividable (e.g. Cembrowski et  
515 al., 2018b) or could not be divided into S-dis and S-pro (Bienkowski et al., 2018; see Figure S11). In  
516 fact, as shown in Figure S11, the distal and proximal “Sub” express Sub and PS genes such as *Nts* and  
517 *Ntng2*, respectively, in the dorsal part. In the ventral part, however, both distal (away from CA1) and  
518 proximal (close to CA1) regions express PS genes (e.g. *Ntng2* and *Sl00a10*). At more caudal levels, it  
519 is even harder to demarcate distal and proximal “Sub” (see Figure S11). Therefore, the concept of distal  
520 and proximal “Sub” cannot be clearly applied to the ventral subicular regions. Here, using distinct  
521 markers consistently defined for Sub and PS cell types from our transcriptomic taxonomy, we have  
522 revealed that the ventral “Sub” region actually belongs to ventral PS (Figures 3, 7C, S4, S11) rather  
523 than ventral Sub.

## 524 525 **Untangling of the wiring circuits of Sub and PS**

526  
527 Guided with reliable boundaries of Sub and PS along the DV axis (Figures 3, S4), we are able to  
528 untangle the wiring circuits of Sub and PS. When the anterograde tracers were restricted in Sub,  
529 labeled axon terminals were mostly observed in RSg, PrS, PaS, MEC, Pro, LS, Re (dl), AV, AM, and  
530 MM (i.e. target set A). In contrast, when the tracers were strictly placed in PS, the terminal labeling  
531 was found in IL, LEC, VS, LS, Re (vm), AON, BST, PRC, PaT-PT, claustrum, amygdala, and almost  
532 all hypothalamic regions (i.e. target set B; see summary in Figure 7A, B). Thus, Sub and PS basically  
533 project to distinct sets of brain regions with only a few exceptions. Three possible exceptions are in LS,  
534 AM and MM where both Sub and PS projections may converge. This is in contrast to previous studies  
535 showing mixed (not distinct) projection patterns of the “Sub”. The reasons for the previous mixed  
536 projection patterns may be four fold. The first is due to the mixing of two different entities (PS and  
537 Sub) into one “Sub”. The second is due to the oblique border between the two entities and the small  
538 size of each. It is thus very difficult to restrict tracer injections into one entity without leaking into the  
539 other in conventional tracing experiments. Third, anterograde tracer injections targeting the most

540 caudal Sub could leak into adjoining MEC. As reported in this study, MEC also has strong projections  
541 to amygdala, and thus could be interpreted as originating from Sub. Fourth, Sub injections in wild-type  
542 mice could reach underlying white matter where axon fibers of passage from PS could take up the  
543 tracers and result in some labeling in PS target regions. Cre-dependent viral tracing used in this study  
544 could increase the accuracy of tracer injections (e.g. Figure S6).  
545

546 The finding of distinct projection patterns of Sub and PS is consistent with previous retrograde  
547 tracing results from the dorsal distal and proximal ‘Sub’. For example, when retrograde tracers were  
548 injected in IL, VS, BST, amygdala and PRC, labeled neurons were found only in the proximal ‘Sub’  
549 region corresponding to PS in this study (Christie et al., 1987; Ishizuka, 2001; Kishi et al., 2006;  
550 Ottersen, 1982; Phillipson and Griffiths, 1985; Shi and Cassell, 1999; Veening, 1978; Weller and  
551 Smith, 1982; Witter, 2006; Witter et al., 1990). When the retrograde tracers were injected into RSg and  
552 AV, labeled neurons were only observed in the distal ‘Sub’ corresponding to the Sub proper revealed in  
553 the present study (Christiansen et al., 2016; Meibach and Siegel, 1977b; Wyss, and Van Groen, 1992).  
554 However, the ventral ‘Sub’ region could not be subdivided into distal (away from CA1) and proximal  
555 (close to CA1) parts and it actually belongs to ventral PS, as demonstrated in the present study. Thus,  
556 distinguishing Sub from PS consistently along DV axis is very helpful in interpreting inconsistent and  
557 confusion results from previous studies. Consistently, afferent projections to Sub and PS were found to  
558 originate generally from differential brain regions. As summarized in Figure 7A-B, PS receives major  
559 inputs from CA3, CA1, LEC, piriform cortex, midline thalamic nuclei, medial septal nucleus and  
560 amygdala while Sub receives its inputs mainly from CA1, MEC, PrS, and AV-AM (also see Agster and  
561 Burwell, 2013; Amaral et al., 1991; Ding, 2013; Roy et al., 2017; Tamamaki et al., 1987).  
562

563 Taken together, the Sub and PS defined in this study apply well to both dorsal and ventral ‘Sub’  
564 regions and display distinct wiring circuits with PS having more widespread inputs and outputs than  
565 Sub. The Sub connects with regions heavily involved in the procession of spatial information and  
566 navigation. In contrast, PS connects with limited cortical regions but many subcortical regions that  
567 have strong association with motivation, reward, emotion, fear and stress.  
568

### 569 **Topographic and differential projections of Sub and PS along DV axis**

570

571 With the exception of Pro and Re, all other main target regions of Sub receive clear topographic  
572 projections from Sub. These findings are consistent with previous retrograde tracing results in rat  
573 (Allen and Hopkins, 1989; Honda and Ishizuka, 2015; Meibach and Siegel, 1977a; Wyss and Van  
574 Groen, 1992) and mouse (Cembrowski et al., 2018a) because retrogradely labeled neurons in these  
575 studies are actually restricted in the region corresponding to the Sub proper of the present study.  
576 Moreover, the dorsal and ventral limits of Sub are highly consistent with the dorsal and ventral borders  
577 revealed with the molecular markers in the present study. Thus, the topographic projections from Sub  
578 to its main target regions such as RSg, MEC, and PrS could also be used to confirm the most dorsal and  
579 the most ventral limits of Sub, as shown in Figure S4. Another important finding is the absence of DV  
580 difference of Sub projections because Sub at all DV levels have dense projections to RSg, MM, MEC,  
581 PrS, PaS and AV-AM.  
582

583 In previous studies, however, connectional difference of the ‘Sub’ region and CA1 along DV axis  
584 was frequently reported (see Strange et al., 2014). In this study, we found this DV difference exists for  
585 PS and CA1 projections but not for Sub projections. The main reason for this discrepancy is that many  
586 previous studies did not recognize PS but treated it as part of the ‘Sub’ (Canteras and Swanson, 1992;  
587 Cullinan et al, 1993; Swanson and Cowan, 1977) and/or did not use reliable markers to distinguish Sub  
588 from PS. Using reliable molecular markers in this study we found that PS and adjoining CA1 have

589 obvious differential DV projections. This difference includes (1) ventral PS has dense while dorsal PS  
590 has no or few projections to AON, BST and hypothalamus; (2) ventral PS has much stronger  
591 projections to VS, LS, and amygdala than dorsal PS does. Interestingly, PS projections to VS, IL, LS,  
592 and BL of the amygdala show rough topographic organization.

593  
594 Another important finding of the present study is that Sub and PS dominates the dorsal and ventral  
595 “subicular” region, respectively, along DV axis (see Figures 3, S4 and 7C). In fact, we found the most  
596 dorsal region lacks PS (Figures 3A, S4A, B) while the most ventral region lacks Sub (Figures 3H-J, N,  
597 O; S4F, G, N, O), and the size and extent of Sub and PS display opposite DV gradients (Figure 7C).  
598 This finding indicates that dorsal “subicular” lesion mainly damages Sub while ventral “subicular”  
599 lesion mainly damages PS. This result explains well the previous lesion and behavioral findings that  
600 dorsal lesion mainly displayed impaired spatial processing and navigation while ventral lesion mainly  
601 showed impaired reward, emotion, motivation, fear and stress response (O'Mara et al., 2009; Strange et  
602 al., 2014).

603

### 604 **Functional implications**

605

606 Consistent with many previous works, the present study demonstrated that the main targets of Sub  
607 projections include RS (RSg), MEC, PrS, PaS, MM, ATN (AV and AM) and Re. Lesions in these  
608 structures and in the dorsal “Sub” heavily impair spatial memory, orientation and navigation (Aggleton  
609 and Christiansen, 2015; Cembrowski et al, 2018a; Potvin et al, 2009). Physiologically, these structures  
610 contain cells sensitive to spatial information such as grid cells, head direction cells, boundary vector  
611 cells and cells encoding animal’s current axis of travel relative to environmental boundaries (Hafting et  
612 al, 2005; Jankowski et al, 2014; Lever et al, 2009; Olson et al, 2017; Taube, 2007). The topographic  
613 organization of Sub projections to the main target structures (rat: Honda and Ishizuka, 2015; Wyss and  
614 Van Groen, 1992; mouse: this study) and gradient gene expression along DV axis (Strange et al, 2014)  
615 of the hippocampus including Sub also appear to support spatial processing and computation.

616

617 Many previous studies reported ventral “Sub” projections to IL, LEC, PRC, LS, VS, BST, AON,  
618 Pat-PT, amygdala and hypothalamus (see Bienkowski et al., 2018; Ding, 2013; Jin et al., 2015).  
619 Lesions or simulations in these structures and in the ventral “Sub” resulted in changed feeding and  
620 social behavior and stress responses (Aqrabawi et al., 2016; Cassel et al., 2013; Farrell et al., 2010; Hsu  
621 et al., 2014; Mannella et al., 2013; Parfitt et al., 2017; Riaz et al. 2017; Sweeney et al. 2015, 2016;  
622 Vranjkovic et al. 2017; Wassum and Izquierdo, 2015). In this study we recognize that this ventral “Sub”  
623 actually belongs to ventral PS in terms of its gene expression and connectivity patterns. Recently, the  
624 “CA1v” region, corresponding to PSv and adjoining CA1v of the present study, has been found to  
625 contain a lot of “anxiety” cells which mainly project to hypothalamus and drive anxiety-related  
626 avoidance behavior and aversion (Jimenez et al, 2018). This same region also contains another set of  
627 cells that project to amygdala and mainly modulate contextual fear memory encoding and retrieval  
628 (Jimenez et al, 2018). One striking finding of this study is that PS contains at least 14 clusters (cell  
629 types). We hypothesize that different cell types might innervate a subset of target regions of PS and  
630 thus modulate a specific subset of neurons responsible for different function in fear, anxiety, reward,  
631 motivation, stress and addiction. For example, *Slc17a6* expressing neurons in PSpy-de do not appear to  
632 innervate amygdala while *Calb1* expressing neurons in PSpy-su do (Fig. S7). Therefore, *Calb1*-Cre  
633 mice could be used to specify the function of the PS projections to amygdala in future studies.

634

635 In summary, as demonstrated in this study, Sub and PS are two distinct regions with differential  
636 transcriptome, molecular signature, connectivity and functional correlation along the entire DV axis.  
637 The benefits of introducing/rescuing the term PS for rodent brain include at least the following aspects:

638 1. Enable consistent description of Sub and PS across species; 2. Match well to distinct molecular  
639 markers and connectivity of Sub and PS along DV axis; 3. Correlate well with differential functions of  
640 Sub and PS; 4. Enable accurate targeting and description for future lesion, injection, stimulation and  
641 recording studies; 5. Facilitate accurate evaluation and interpretation of the results from animal models  
642 of related diseases.

643  
644

## 645 **STAR\*METHODS**

646

647 All experimental procedures were approved by the Allen Institute Animal Care and Use Committee and  
648 conform to NIH guidelines.

649

### 650 **Single-cell isolation for SMART-Seq**

651 We adapted a previously described protocol to isolate neurons from the mouse brain (Tasic et al.,  
652 2018). Briefly, adult male and female mice (P56 ± 3; n=4) from the pan-glutamatergic mouse line  
653 *Slc17a7-IRES2-Cre;Ai14* were anesthetized with isoflurane and perfused with cold carbogen-bubbled  
654 artificial cerebrospinal fluid (ACSF). The brain was dissected, submerged in ACSF, embedded in 2%  
655 agarose, and sliced into 250-µm coronal sections on a compresstome (Precisionary). Under microscope,  
656 and with reference to Allen Mouse Brain CCF (v3), full DV extent of the regions PS-Sub-HA and PrS-  
657 PoS-PaS were microdissected from the 250-µm thick slices with a knife and dissociated into single  
658 cells with 1 mg/ml pronase (Sigma, Cat#P6911-1G). Single cells were isolated by FACS into individual  
659 wells of 8-well PCR strips containing lysis buffer from the SMART-Seq v4 kit with RNase inhibitor  
660 (0.17 U µl<sup>-1</sup>), immediately frozen on dry ice, and stored at -80 °C.

661

### 662 **Single-cell isolation for 10X Chromium v2**

663 Adult male and female mice (P56 ± 3; n=2) from the pan-neuronal mouse line *Snap25-IRES2-Cre;Ai14*  
664 were anesthetized, brains were dissected, and 250-µm thick coronal slices were prepared as described  
665 for SMART-Seq processing. The entire region containing full DV extent of PS-Sub-HA-PrS-PoS-PaS  
666 were micro-dissected out with a knife and a microscope, under which the anatomic borders can be  
667 identified, and digested with 30 U/ml papain (Worthington #PAP2) in ACSF for 30 mins at 35 °C in a  
668 dry oven, with a targeted solution temperature of 30 °C. Enzyme digestion was quenched by  
669 exchanging the papain solution three times with quenching buffer (ACSF with 1% FBS and 0.2%  
670 BSA). Samples were incubated on ice for 5 minutes before trituration. In 1 ml of quenching buffer, the  
671 tissue pieces were triturated through a fire-polished pipette, with 600-µm diameter opening,  
672 approximately 20 times. Tissue pieces were allowed to settle, and the supernatant, which now contains  
673 suspended single cells, were transferred to a new tube. Fresh quenching buffer (1 ml) was added to the  
674 settled tissue pieces, and trituration and supernatant transfer was repeated using 300-µm and 150-µm  
675 fire polished pipettes. Final volume of the single cell suspension is 3 ml. It is possible for small tissue  
676 pieces to remain in the original tube after these three rounds of trituration, and these are discarded. To  
677 remove excessive debris, the single cell suspension was passed through a 70-µm filter into a 15-ml  
678 conical tube with 500 µl of high BSA buffer (ACSF with 1% FBS and 1% BSA) at the bottom to help  
679 cushion the cells during centrifugation at 100xg in a swinging bucket centrifuge for 10 minutes. The  
680 supernatant was discarded, and the cell pellet was resuspended in 1 ml quenching buffer. Cells were  
681 passed through 70-µm filter again and DAPI (2 ng/ml) was added to the suspension. Cells were isolated  
682 using FACS (BD Aria II) gated on DAPI and tdTomato. In order to increase yield while reducing the  
683 sheath volume in the sorted suspension, we sorted on Fine Tune mode which has Yield, Purity, and  
684 Phase Mask all set to 0. We divided up the sample so that we could sort 30,000 cells at a time, within  
685 10 minutes, into 5-ml tube containing 500 µl of quenching buffer. Each aliquot of sorted 30,000 cells  
686 were immediately centrifuged at 230xg for 10 minutes in a swinging bucket centrifuge with 200 µl of

687 high BSA buffer at the bottom for cushion. No pellet can be seen with this small number of cells, so we  
688 take out the supernatant and leave behind 35  $\mu$ l of buffer, in which we resuspended the cells. The  
689 resuspended cells are stored at 4 °C until all samples have been collected for chip loading on the 10X  
690 Genomics controller. Our typical sort takes 30 minutes for three aliquots. We observe more cell death  
691 for longer sorts. Typically, one aliquot of 30,000 sorted cells result in a final suspension of 5,000 -  
692 20,000 viable cells for loading onto one port of the 10X Genomics chip.

693

### 694 **cDNA amplification and library construction**

695 We used the SMART-Seq v4 Ultra Low Input RNA Kit for Sequencing (Takara, 634894) to reverse  
696 transcribe poly(A) RNA and amplify full-length cDNA. We performed reverse transcription and cDNA  
697 amplification for 18 PCR cycles in 8-well strips, in sets of 12–24 strips at a time. All samples  
698 proceeded through Nextera XT DNA Library Preparation (Illumina FC-131-1096) using Nextera XT  
699 Index Kit V2 (FC-131-2001). Nextera XT DNA Library prep was performed according to  
700 manufacturer’s instructions except that the volumes of all reagents including cDNA input were  
701 decreased to 0.4 $\times$  or 0.5 $\times$  by volume. Subsampling of the reads to a median of 0.5 million per cell  
702 results in similar gene detection per cell (>89% of genes detected, data not shown), showing that we  
703 detect most of the genes at 2.5 million reads per cell. Details are available in ‘Documentation’ on the  
704 Allen Institute data portal at: <http://celltypes.brain-map.org>. For 10X Genomics processing, we used  
705 Chromium Single Cell 3’ Reagent Kit v2 (10X Genomics #120237). We followed manufacturer’s  
706 instructions for cell capture, barcoding, reverse transcription, cDNA amplification, and library  
707 construction. Average sequencing depth was ~59k reads per cell across 9 libraries.

708

### 709 **Sequencing data processing and quality control**

710 For the SMART-Seq V4 dataset, fifty-base-pair paired-end reads were aligned to GRCm38 (mm10)  
711 using a RefSeq annotation gff file retrieved from NCBI on 18 January 2016  
712 ([https://www.ncbi.nlm.nih.gov/genome/anno-tation\\_euk/all/](https://www.ncbi.nlm.nih.gov/genome/anno-tation_euk/all/)). Sequence alignment was performed  
713 using STAR v2.5.3 with twopassMode. PCR duplicates were masked and removed using STAR option  
714 ‘bamRemoveDuplicates’. Only uniquely aligned reads were used for gene quantification. Gene read  
715 counts were quantified using the summarizeOverlaps function from R GenomicAlignments package  
716 using both intronic and exonic reads, and QC was performed as described in (Tasic 2018). The 10X  
717 dataset was processed using cellranger v3.0.0 pipeline. Doublet detection was performed using  
718 scratth.hicat doubletFinder function, adapted from the original doubletFinder package v1.0  
719 (<https://github.com/chris-mcginnis-ucsf/DoubletFinder>) for better efficiency and performance. 10X  
720 doublet cells were defined as cells with doublet score greater than 0.3, and removed before clustering.  
721 We determined 10X cell class based canonical markers into neurons and non-neuronal cells. For  
722 neuronal cells, we selected cells with at least 2000 detected genes, and for non-neuronal cells, we  
723 selected cells with at least 1000 detected genes.

724

### 725 **Clustering**

726 Clustering for both SMART-Seq and 10X datasets were performed using house developed R package  
727 scratth.hicat (available via github <https://github.com/AllenInstitute/sratth.hicat>). In addition to  
728 classical single-cell clustering processing steps provided by other tools such as Seurat, this package  
729 features automatically iterative clustering by making finer and finer splits while ensuring all pairs of  
730 clusters, even at the finest level, are separable by fairly stringent differential gene expression criteria.  
731 The package also performs consensus clustering by repeating iterative clustering step on 80%  
732 subsampled set of cells 100 times, and derive the final clustering result based on cell-to-cell co-  
733 clustering probability matrix. This feature enable us to both fine tune clustering boundaries and to  
734 assess clustering uncertainty. For differential gene expression criteria between clusters, q1.th = 0.4,  
735 q.diff.th=0.7, de.score.th=150, min.cells=20 is used for 10X cells, and q1.th = 0.5, q.diff.th=0.7,

736 de.score.th=150, min.cells=4 is used for SMART-Seq cells. Clusters for each dataset were inspected  
737 manually, and based on marker genes, clusters that believed to be outside of subicular complex were  
738 eliminated from downstream analysis.

739

#### 740 **Consensus clustering between 10X and SMART-Seq**

741 To provide one consensus subicular cell type taxonomy based on both 10X and SMART-Seq datasets,  
742 we developed a novel integrative clustering analysis across multiple data modalities, now available via  
743 unify function of scratth.hicat package. Unlike Seurat CCA approach (Butler et al., 2018) and scVI  
744 (Lopez et al., 2018), which aim to find aligned common reduced dimensions across multiple datasets,  
745 this method directly builds a common adjacency graph using all cells from all datasets, then applies  
746 standard Louvain community detection approach for clustering. To build the common graph, we first  
747 chose a subset of reference datasets from all available datasets, which either provides stronger gene  
748 detection and/or more comprehensive cell type coverage. The key steps of the pipeline are outlined  
749 below:

- 750 **1 Select anchor cells for each reference dataset.** For each reference dataset, we random sampled  
751 up to 5000 cells as anchors. If independent clustering results for the reference datasets are  
752 available, we sample at least 100 anchor cells per cluster to achieve more uniform coverage of  
753 cell type.
- 754 **2 Select high variance genes.** High variance genes and PCA dimensions reduction were  
755 performed using scratth.hicat package. PCA dimensions that highly correlated with technical  
756 bias such as gene detection or mitochondria gene expression were removed. For each remaining  
757 PCA dimension, Z scores were calculated for gene loadings, and top 100 genes with absolute Z  
758 score greater than 2 were selected. The high variance genes from all references datasets were  
759 pooled.
- 760 **3 Compute K nearest neighbors.** For each cell in each dataset, we computed its K nearest  
761 neighbors among anchor cells in each reference datasets based on the high variance genes  
762 selected above. Different distance metrics can be selected for computing nearest neighbors  
763 between different pairs of datasets. By default, Euclidean distance is used when query and  
764 reference dataset is the same. Between different datasets, correlation is used as similarity  
765 metrics to select K nearest neighbors.
- 766 **4 Compute the Jaccard similarity.** For every pair of cells from all datasets, we compute their  
767 Jaccard similarity, defined as the ratio of the number of shared K nearest neighbors (among all  
768 anchors cells) over the number of combined K nearest neighbors.
- 769 **5 Perform Louvain clustering based on Jaccard similarity.**
- 770 **6 Merge clusters.** To ensure that every pair of clusters are separable by conserved differentially  
771 expressed (DE) genes across all datasets, for each cluster, we first identified the top 3 nearest  
772 clusters. For each pair of such close-related clusters, we computed the differentially expressed  
773 genes in each dataset, and choose the DE genes that are significant in at least one dataset, while  
774 also having more than 2 fold change in the same direction in all datasets. We then compute the  
775 overall statistical significance based on such conserved DE genes for each dataset  
776 independently. If any of the dataset pass our DE gene criteria (Tasic et al., 2018), the pair of  
777 clusters remained separated, otherwise they were merged. DE genes were recomputed for  
778 merged clusters, and the process repeat until all clusters are separable by sufficient number of  
779 conserved DE genes. If one cluster has fewer than the minimal number of cells in a dataset, then  
780 this dataset is not used for DE gene computation for all pairs involving the given cluster. This  
781 step allows detection of unique clusters only present in a subset of clusters.
- 782 **7 Repeat steps 1-6 for cells within cluster to gain finer resolution clusters until no clusters can be**  
783 **found.**



784 **8** Concatenate all the clusters from all the iterative clustering steps, and perform final merging as  
785 described in step 6.  
786

787 This integrative clustering pipeline allows us to resolve clusters at fine resolution, while ensuring  
788 proper alignment between datasets by requiring presence of conserved DE genes. It also allows us  
789 to leverage the strengths of different datasets. For example, between clusters that are separated by  
790 weakly expressed genes, SMART-Seq dataset provides the statistical power for separation, and the  
791 relevant genes help to separate 10X cells into clusters with consistent fold change. On the other  
792 hand, for clusters that have very few cells in SMART-Seq, 10X provides the statistical power for  
793 separation, and relevant genes are used to split SMART-Seq cells accordingly.  
794

795 We applied this pipeline using both SMART-Seq and 10X datasets as reference, and the consensus  
796 clustering results were highly concordant with independent clustering results. All the major cell  
797 type markers are highly conserved at the cluster level. We calculated conserved DE genes between  
798 all pairs of clusters, and calculated the cluster means of these genes for each dataset. The  
799 concatenated cluster mean expression profiles across all datasets are used to build cell type  
800 taxonomy tree. Using the K nearest neighbors, we imputed the gene expression of SMART-seq  
801 cells based on 10X anchor genes, and imputed gene expression is used to create tSNE plot.  
802

### 803 Confusion matrix analysis workflow

804

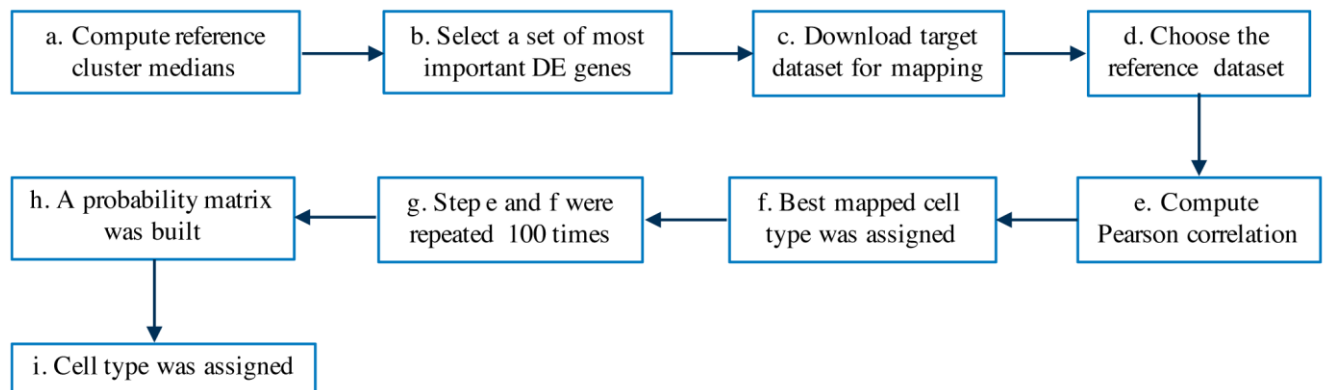

805

806

807 (a) Compute reference cluster medians: median gene expressions for each cell type (in this work)  
808 was computed for Smartseq cells and for 10X cells individually; (b) select a set of most important  
809 DE genes: a set of most important differentially expressed genes (~4570) was selected (this was  
810 done during clustering); (c) download target dataset for mapping: Gene expression and the cell  
811 types (clusters) of the target dataset (e.g. dataset from Cembrowski et al., 2018b) was downloaded;  
812 (d) choose the reference dataset: depending on the target data collection method, either Smartseq or  
813 10X reference was chosen; (e) compute Pearson correlation: Pearson correlation was computed  
814 between each target cell gene expression and the cluster median gene expression of the reference  
815 dataset. A random selection of 80% of selected genes were used; (f) best mapped cell type was  
816 assigned: reference cell type which has the highest correlation with the target cell was assigned as  
817 the best mapped cell type for that cell; (g) step e and f were repeated 100 times: each time 80% of  
818 selected genes were used at random; (h) a probability matrix was built: using the result of step g, a  
819 probability matrix was built which shows what is the probability of a target cell to be mapped to  
820 each of the reference cell types; (i) cell type was assigned: for each target cell, the cell type which  
821 has the highest mapped probability was assigned as the corresponding cell type.  
822

## 823 ***In situ* hybridization (ISH) and anatomical mapping of the clusters**

824 ISH data used for anatomical registration and spatial validation of the transcriptional clusters are  
825 from Allen Mouse Brain Atlas (Lein et al, 2007), which is publicly available at [www.brain-map.org](http://www.brain-map.org).  
826 Detailed description can be found at Allen Mouse Brain Atlas documentation page ([http://help.brain-](http://help.brain-map.org/display/mousebrain/Documentation)  
827 [map.org/display/mousebrain/Documentation](http://help.brain-map.org/display/mousebrain/Documentation)). Generally, 20-50 marker genes for each cluster were  
828 selected from transcriptome and their expression in Sub, PS and adjoining regions was examined and  
829 validated with Allen Mouse Brain Atlas ISH dataset. Afterwards, representative ISH images for the  
830 locations of specific clusters were downloaded and displayed as shown in Figures 2, S1 and S3 and  
831 Table S1.

832

## 833 **Selection of gene markers for Sub and PS**

834 Since the “subicular” region distributes along a long DV axis, we chose the well-characterized  
835 dorsal portion for gene differentiation between Sub and PS. Based on unbiased transcriptomic  
836 clustering, we chose strongly and selectively expressed genes as marker genes for Sub and PS,  
837 respectively. For example, *Ntng2* and *Calb1* are strongly expressed in the region close to CA1 (i.e.  
838 away from PrS; see Figures 3, S4) but not in the region close to PrS (i.e. away from CA1) and these  
839 two genes could be treated as PS markers based on the concept and definition of PS (Bienkowski et al.,  
840 2018; Ding, 2013; Lorente de No, 1934; Rosene and Van Hoesen, 1987; Saunders et al., 1988a, b).  
841 Consistently, the genes expressed strongly and selectively in the region close to PrS but not in the  
842 region close to CA1 (e.g. *Nts* and *Bcl6*) were treated as Sub markers (see Figures 3, S4). These selected  
843 gene markers were then applied to the whole “subicular” region along DV axis to obtain consistent and  
844 reliable boundaries of Sub and PS, which is critical for evaluation of tracer injections.

845

## 846 **Mice used for tracing studies**

847 Wild type (C57BL/6J; n=20) and Cre driver transgenic mice (n=72) at postnatal day (P)  $56 \pm 3$  were  
848 used in tracing study. The Cre lines mainly includes *Cux2-IRES-Cre* (n=8), *Calb1-T2A-dgCre* (n=3),  
849 *Dlg3-Cre\_KG118* (n=1), *Drd1a-Cre\_EY262* (n=1), *Drd3-Cre\_KI196* (n=3), *Etv1-CreERT2* (n=3),  
850 *Grik4-Cre* (n=8), *Grm2-Cre\_MR90* (n=1), *Gpr26-Cre\_KO250* (n=4), *Grp-Cre-KH288* (n=3), *Ntng2-*  
851 *IRES2-Cre* (n=3), *Otof-Cre* (n=3), *Pcdh9-Cre\_NP276* (n=2), *Plxnd1-Cre\_OG1* (n=2), *Ppp1r17-*  
852 *Cre\_NL146* (n=5), *Rorb-IRES2-Cre* (n=2), *Scnn1a-Tg3-Cre* (n=3), *Slc17a6-IRES-Cre* (n=5), *Slc17a7-*  
853 *IRES2-Cre* (n=2), *Syt17-Cre\_NO14* (n=6), *Trib2-2A-CreERT2* (n=1) and *Vipr2-Cre\_KE2* (n=3). These  
854 lines were generated at the Allen Institute or imported from external sources (see Harris et al, 2014)  
855 and examples of Cre expression in Sub, PS and adjoining regions from these lines were shown in  
856 Figure S6 and Table S2.

857

## 858 **Animal surgery and tracer injection**

859 The methods for animal surgery and tracer injection were reported previously (Oh et al., 2014) and  
860 can be found at the Allen Mouse Brain Connectivity Atlas documentation page ([http://help.brain-](http://help.brain-map.org/display/mouseconnectivity/Documentation)  
861 [map.org/display/mouseconnectivity/Documentation](http://help.brain-map.org/display/mouseconnectivity/Documentation)). Briefly, both wild type and Cre mice were  
862 anesthetized with 5% isoflurane and mounted onto a stereotaxic frame (model 1900; Kopf, Tujunga,  
863 CA) prior to surgery. During surgery, anesthesia was maintained at 1.8–2% isoflurane. For subicular  
864 and prosubicular injections along the D-V axis, a glass pipette (inner tip diameter 10-20  $\mu$ m) loaded  
865 with AAV was lowered to the desired depth based on the atlas of Paxinos and Franklin (2012). For  
866 wild-type mice, a pan-neuronal AAV vector expressing EGFP under the human synapsin I promoter  
867 (AAV2/1.pSynI.EGFP.WPRE.bGH) was injected in target regions, while in Cre driver mice a Cre-  
868 dependent AAV (AAV2/1.pCAG.FLEX.EGFP.WPRE.bGH) was injected. The AAV (serotype 1,  
869 produced by UPenn viral core; titer  $> 10^{12}$  GC/ml) was delivered by iontophoresis (current 3  $\mu$ A and 7  
870 seconds on/7 seconds off duty cycle) for 5 minutes. After tracer injections, the skin incision was  
871 sutured and the mice were returned to their cages for recovery.

872

873

### **Brain preparation and imaging**

874

875

876

877

878

879

880

881

882

883

After 21 days of survival time, mice were intracardially perfused with 10 ml 0.9% NaCl followed by 50 ml freshly prepared 4% paraformaldehyde (PFA) after anesthetization with 5% isoflurane. After extraction, brains were postfixed in 4% PFA at room temperature for 3–6 hours and overnight at 4 °C, then stored in PBS with 0.1% sodium azide. For imaging, brains were placed in 4.5% oxidized agarose (made by stirring 10 mM NaIO<sub>4</sub> in agarose), transferred to a phosphate buffer solution, and placed in a grid-lined embedding mold for standardized orientation in an aligned coordinate space. Multiphoton image acquisition was accomplished by using the TissueCyte 1000 system (TissueVision, Cambridge, MA) coupled with a Mai Tai HP DeepSee laser (Spectra Physics, Santa Clara, CA), as described in Oh et al. (2014) for the Allen Mouse Brain Connectivity Atlas.

884

### **Evaluation of tracer injection sites**

885

886

887

888

889

890

891

892

Locations and extent of the injection sites in Sub and/or PS were evaluated based on the boundaries defined along DV axis of hippocampus in this study (see Figure 3). In addition, the term “effective injection site” was introduced in Cre-dependent viral tracing. Specifically, for example, when a tracer injection was involved in both region A and adjacent region B but the gene driving Cre was only expressed in cells of region A, then region A is the effective injection site because cells in region B would not express the GFP fluorescent tracer (see Table S2 for detailed Cre-lines and related effective injection sites).

893

### **Projection quantification**

894

895

896

897

898

899

900

901

902

903

904

Quantification of projection density was performed according to the methods and Informatics Data Processing Pipeline (IDP) for the Allen Mouse Brain Connectivity Atlas (Kuan et al., 2015; Oh et al., 2014;). Briefly, an alignment module of the IDP was used to align all injection experiments with the average 3D model brain after image reprocessing. A signal algorithm, based on a combination of adaptive edge/line detection and morphological processing, was applied to each section image to differentiate positive fluorescent signal from background signal. Segmented signal pixels were counted as projection strength in the claustrum and cortical areas. It should be noted that the detection algorithm operates on a per-image basis and that passing fibers and axon terminals were not distinguished (see e.g. Figure S10). Imperfect alignment of each injection image set with the Allen Mouse Brain CCF may also affect the quantification of the projections.

905

### **Terminology used for mouse brain structures**

906

907

908

909

910

The mouse brain atlas of Paxinos and Franklin (2012) and Allen Mouse Brain CCF (v3) were used in this study. Many structure terminologies are the same or similar in both atlases. See Table S3 for abbreviations/acronyms and full names of the brain structures used in this study.

911

## **SUPPLEMENTAL INFORMATION**

912

913

914

Supplemental information includes eleven figures and four tables.

915

## **ACKNOWLEDGEMENTS**

916

917

918

919

920

We are grateful for the technical support and expertise of the many staff members in the Allen Institute who are not part of the authorship of this paper. This work was funded by the Allen Institute for Brain Science. The authors wish to thank the Allen Institute founders, Paul G. Allen and Jody Allen, for their vision, encouragement, and support. The research was also supported by BRAIN Initiative Cell Census Network (BICCN) grant award U19MH114830 from the National Institute of Mental Health to H.Z.

921 The content is solely the responsibility of the authors and does not necessarily represent the official  
922 views of National Institutes of Health and National Institute of Mental Health.

923  
924

### 925 **AUTHOR CONTRIBUTIONS**

926 Conceptualization: S.L.D. and H.Z. Transcriptomic data acquisition: K.A.S., T.N.N. and B.T.  
927 Connectivity data acquisition: K.E.H., P.B., K.N. and J.A.H. Data evaluation: Z.Y. and S.L.D.  
928 Clustering analysis: Z.Y., L.T.G. and O.F. Anatomical mapping of transcriptomic clusters: S.L.D.  
929 Connectivity data analysis: S.L.D. Figures preparation: S.L.D. Manuscript preparation: S.L.D., Z.Y.  
930 and H.Z., with inputs from other authors. Supervision: H.Z., B.T., J.A.H., E.S.L., J.W.P., C.K. and  
931 K.A.S. All authors read and commented on the manuscript.

932  
933

### 934 **DELCLARATION of INTERESTS**

935 The authors declare no competing interests.

936  
937

### 938 **REFERENCES**

939

940 Aggleton, J.P. (2012). Multiple anatomical systems embedded within the primate medial temporal  
941 lobe: implications for hippocampal function. *Neurosci. Biobehav. Rev.* 36,1579-1596.

942

943 Aggleton, J.P., and Christiansen, K. (2015). The subiculum: the heart of the extended hippocampal  
944 system. *Prog. Brain Res.* 219,65-82.

945 Agster, K.L., and Burwell, R.D. (2013). Hippocampal and subicular efferents and afferents of the  
946 perirhinal, postrhinal, and entorhinal cortices of the rat. *Behav. Brain Res.* 254, 50-64.

947 Allen, G.V., and Hopkins, D.A. (1989). Mamillary body in the rat: topography and synaptology of  
948 projections from the subicular complex, prefrontal cortex, and midbrain tegmentum. *J. Comp. Neurol.*  
949 286, 311-336.

950 Amaral, D.G., Dolorfo, C., and Alvarez-Royo, P. (1991). Organization of CA1 projections to the  
951 subiculum: a PHA-L analysis in the rat. *Hippocampus.* 1, 415-435.

952

953 Andrzejewski, M.E., Spencer, R.C., and Kelley, A.E. (2006). Dissociating ventral and dorsal subicular  
954 dopamine D1 receptor involvement in instrumental learning, spontaneous motor behavior, and  
955 motivation. *Behav. Neurosci.* 120,542-553.

956

957 Aqrabawi, A.J., Browne, C.J., Dargaei, Z., Garand, D., Khademullah, C.S., Woodin, M.A., and Kim,  
958 J.C. (2016). Top-down modulation of olfactory-guided behaviours by the anterior olfactory nucleus  
959 pars medialis and ventral hippocampus. *Nat. Commun.* 7:13721. doi: 10.1038/ncomms13721.

960

961 Arikuni, T., Sako, H., and Murata, A. (1994). Ipsilateral connections of the anterior cingulate cortex  
962 with the frontal and medial temporal cortices in the macaque monkey. *Neurosci. Res.* 21,19-39.

963

964 Barbas, H., and Blatt, G.J. (1995). Topographically specific hippocampal projections target functionally  
965 distinct prefrontal areas in the rhesus monkey. *Hippocampus* 5,511-533.

966

- 967 Bienkowski, M.S., Bowman, I., Song, M.Y., Gou, L., Ard, T., Cotter, K., Zhu, M., Benavidez, N.L.,  
968 Yamashita, S., Abu-Jaber, J., et al. (2018). Integration of gene expression and brain-wide connectivity  
969 reveals the multiscale organization of mouse hippocampal networks. *Nat. Neurosci.* 21,1628-1643.  
970
- 971 Butler, A., Hoffman, P., Smibert, P., Papalexi, E., and Satija, R. (2018). Integrating single-cell  
972 transcriptomic data across different conditions, technologies, and species. *Nat. Biotechnol.* 36, 411-  
973 420.  
974
- 975 Canteras, N.S., and Swanson, L.W. (1992). Projections of the ventral subiculum to the amygdala,  
976 septum, and hypothalamus: a PHAL anterograde tract-tracing study in the rat. *J. Comp. Neurol.*  
977 324,180-194.  
978
- 979 Cassel, J.C., Pereira de Vasconcelos, A., Loureiro, M., Cholvin, T., Dalrymple-Alford, J.C., and  
980 Vertes, R.P. (2013). The reuniens and rhomboid nuclei: neuroanatomy, electrophysiological  
981 characteristics and behavioral implications. *Prog. Neurobiol.* 111,34-52.  
982
- 983 Cembrowski, M.S., Phillips, M.G., DiLisio, S.F., Shields, B.C., Winnubst, J., Chandrashekar, J., Bas,  
984 E., and Spruston, N. (2018a). Dissociable structural and functional hippocampal outputs via distinct  
985 subiculum cell classes. *Cell.* 173,1280-1292.  
986
- 987 Cembrowski, M.S., Wang, L., Lemire, A.L., Copeland, M., DiLisio, S.F., Clements, J., and Spruston,  
988 N. (2018b). The subiculum is a patchwork of discrete subregions. *Elife.* 7. pii: e37701. doi:  
989 10.7554/eLife.37701.  
990
- 991 Christie, M.J., Summers, R.J., Stephenson, J.A., Cook, C.J., and Beart, P.M. (1987). Excitatory amino  
992 acid projections to the nucleus accumbens septi in the rat: a retrograde transport study utilizing  
993 D[3H]aspartate and [3H]GABA. *Neuroscience.* 22,425-439.  
994
- 995 Christiansen, K., Dillingham, C.M., Wright, N.F., Saunders, R.C., Vann, S.D., and Aggleton, J. P.  
996 (2016). Complementary subicular pathways to the anterior thalamic nuclei and mammillary bodies in  
997 the rat and macaque monkey brain. *Eur. J. Neurosci.* 43, 1044-1061.  
998
- 999 Christensen, M.K., and Frederickson, C.J. (1998). Zinc-containing afferent projections to the rat  
1000 corticomедial amygdaloid complex: a retrograde tracing study. *J. Comp. Neurol.* 400,375-390.  
1001
- 1002 Coras, R., Pauli, E., Li, J., Schwarz, M., Rössler, K., Buchfelder, M., Hamer, H., Stefan, H., and  
1003 Blumcke, I. (2014). Differential influence of hippocampal subfields to memory formation: insights  
1004 from patients with temporal lobe epilepsy. *Brain.* 137,1945-1957.  
1005
- 1006 Cullinan, W.E., Herman, J.P., and Watson, S.J. (1993). Ventral subicular interaction with the  
1007 hypothalamic paraventricular nucleus: evidence for a relay in the bed nucleus of the stria terminalis. *J.*  
1008 *Comp. Neurol.* 332,1-20.  
1009
- 1010 Ding, S.L. (2013). Comparative anatomy of the prosubiculum, subiculum, presubiculum,  
1011 postsubiculum, and parasubiculum in human, monkey, and rodent. *J. Comp. Neurol.* 521,4145-4162.  
1012
- 1013 Ding, S.L., and Van Hoesen, G.W. (2015). Organization and detailed parcellation of human  
1014 hippocampal head and body regions based on a combined analysis of cyto- and chemoarchitecture. *J.*  
1015 *Comp. Neurol.* 523, 2233-2253.

1016

1017 Farrell, M.R., Sayed, J.A., Underwood, A.R., and Wellman, C.L. (2010). Lesion of infralimbic cortex  
1018 occludes stress effects on retrieval of extinction but not fear conditioning. *Neurobiol. Learn. Mem.*  
1019 94,240-246.

1020

1021 Fudge, J.L., deCampo, D.M., and Becoats, K.T. (2012). Revisiting the hippocampal-amygdala pathway  
1022 in primates: association with immature-appearing neurons. *Neuroscience.* 212,104-119.

1023

1024 Godsil, B.P., Kiss, J.P., Spedding, M., and Jay, T.M. (2013). The hippocampal-prefrontal pathway: the  
1025 weak link in psychiatric disorders? *Eur. Neuropsychopharmacol.* 23,1165-1181.

1026

1027 Hafting, T., Fyhn, M., Molden, S., Moser, M.B., and Moser, E.I. (2005). Microstructure of a spatial  
1028 map in the entorhinal cortex. *Nature.* 436,801-806.

1029

1030 Harris, J.A., Hirokawa, K.E., Sorensen, S.A., Gu, H., Mills, M., Ng, L.L., Bohn, P., Mortrud, M.,  
1031 Ouellette, B., Kidney, J., et al. (2014). Anatomical characterization of Cre driver mice for neural circuit  
1032 mapping and manipulation. *Front. Neural Circuits.* 8,76. doi: 10.3389/fncir.2014.00076.

1033

1034 Herman, J.P., and Mueller, N.K. (2006). Role of the ventral subiculum in stress integration. *Behav.*  
1035 *Brain Res.* 174,215-224.

1036

1037 Honda, Y., and Ishizuka, N. (2015). Topographic distribution of cortical projection cells in the rat  
1038 subiculum. *Neurosci. Res.* 92,1-20.

1039

1040 Howell, G.A., Perez-Clausell, J., and Frederickson, C.J. (1991). Zinc containing projections to the bed  
1041 nucleus of the stria terminalis. *Brain Res.* 562,181-189.

1042

1043 Hsu, D.T., Kirouac, G.J., Zubieta, J.K., and Bhatnagar, S. (2014). Contributions of the paraventricular  
1044 thalamic nucleus in the regulation of stress, motivation, and mood. *Front. Behav. Neurosci.* 8,73. doi:  
1045 10.3389/fnbeh.2014.00073

1046

1047 Huang, L.W., Simonnet, J., Nassar, M., Richevaux, L., Lofredi, R., and Fricker, D. (2017). Laminar  
1048 localization and projection-specific properties of presubicular neurons targeting the lateral mammillary  
1049 nucleus, thalamus, or medial entorhinal cortex. *eNeuro.* 4, pii: ENEURO.0370-16.2017.

1050

1051 Ishizuka, N. (2001). Laminar organization of the pyramidal cell layer of the subiculum in the rat. *J.*  
1052 *Comp. Neurol.* 435,89-110.

1053

1054 Jankowski, M.M., Islam, M.N., Wright, N.F., Vann,S.D., Erichsen, J.T., Aggleton, J.P., and O'Mara,  
1055 S.M. (2014). Nucleus reuniens of the thalamus contains head direction cells. *Elife.* 3, doi:  
1056 10.7554/eLife.03075.

1057

1058 Jay, T.M., Glowinski, J., and Thierry, A.M. (1989). Selectivity of the hippocampal projection to the  
1059 prelimbic area of the prefrontal cortex in the rat. *Brain Res.* 505,337-340.

1060

1061 Jimenez, J.C., Su, K., Goldberg, A.R., Luna, V.M., Biane, J.S., Ordek, G., Zhou, P., Ong, S.K., Wright,  
1062 M.A., Zweifel, L., et al. (2018). Anxiety cells in a hippocampal-hypothalamic circuit. *Neuron.* 97,670-  
1063 683.

1064

- 1065 Jin, J., and Maren, S. (2015). Fear renewal preferentially activates ventral hippocampal neurons  
1066 projecting to both amygdala and prefrontal cortex in rats. *Sci. Rep.* 5,8388. doi: 10.1038/srep08388.  
1067
- 1068 Kishi, T., Tsumori, T., Yokota, S., and Yasui, Y. (2006). Topographical projection from the  
1069 hippocampal formation to the amygdala: a combined anterograde and retrograde tracing study in the  
1070 rat. *J. Comp. Neurol.* 496,349-368.  
1071
- 1072 Kuan, L., Li, Y., Lau, C., Feng, D., Bernard, A., Sunkin, S.M., Zeng, H., Dang, C., Hawrylycz, M., and  
1073 Ng, L. (2015). Neuroinformatics of the Allen Mouse Brain Connectivity Atlas. *Methods.* 73:4-17.  
1074
- 1075 Lein, E.S., Hawrylycz, M.J., Ao, N., Ayres, M., Bensinger, A., Bernard, A., Boe, A.F., Boguski, M.S.,  
1076 Brockway, K.S., Byrnes, E.J., et al. (2007). Genome-wide atlas of gene expression in the adult mouse  
1077 brain. *Nature.* 445,168-176.  
1078
- 1079 Lever, C., Burton, S., Jeewajee, A., O'Keefe, J., and Burgess, N. (2009). Boundary vector cells in the  
1080 subiculum of the hippocampal formation. *J. Neurosci.* 29, 9771–9777.  
1081
- 1082 Lopez, R., Regier, J., Cole, M.B., Jordan, M.I., and Yosef, N. (2018). Deep generative modeling for  
1083 single-cell transcriptomics. *Nat. Methods.* 15,1053-1058.  
1084
- 1085 Lorente De N6, R. (1934). Studies on the structure of the cerebral cortex. II. Continuation of the study  
1086 of the ammonic system. *J. Psychol. Neurol.* 46, 113-177.  
1087
- 1088 Lu, W., Chen, S., Chen, X., Hu, J., Xuan, A., and Ding, S.L. (2020). Localization of area prostriata and  
1089 its connections with primary visual cortex in rodent. *J. Comp. Neurol.* 528, 389-406.  
1090
- 1091 Mannella, F., Gurney, K., and Baldassarre, G. (2013). The nucleus accumbens as a nexus between  
1092 values and goals in goal-directed behavior: a review and a new hypothesis. *Front. Behav. Neurosci.* 7,  
1093 135.  
1094
- 1095 McDonald, A.J. (1998). Cortical pathways to the mammalian amygdala. *Prog. Neurobiol.* 55,257–332.  
1096
- 1097 Meibach, R.C., and Siegel, A. (1977a). Efferent connections of the hippocampal formation in the rat.  
1098 *Brain Res.* 124,197-224.  
1099
- 1100 Meibach, R.C., and Siegel, A. (1977b). Thalamic projections of the hippocampal formation: evidence  
1101 for an alternate pathway involving the internal capsule. *Brain Res.* 134, 1-12.  
1102
- 1103 Naber, P.A., and Witter, M.P. (1998). Subicular efferents are organized mostly as parallel projections:  
1104 a double-labeling, retrograde-tracing study in the rat. *J. Comp. Neurol.* 393,284-297.  
1105
- 1106 Oh, S.W., Harris, J.A., Ng, L., Winslow, B., Cain, N., Mihalas, S., Wang, Q., Lau, C., Kuan, L., Henry,  
1107 A.M., et al. (2014). A mesoscale connectome of the mouse brain. *Nature.* 508, 207-214.  
1108
- 1109 Olson, J.M., Tongprasearth, K., and Nitz, D.A. (2017). Subiculum neurons map the current axis of  
1110 travel. *Nat. Neurosci.* 20,170-172.  
1111

- 1112 O'Mara, S.M., Sanchez-Vives, M.V., Brotons-Mas, J.R., and O'Hare, E. (2009). Roles for the  
1113 subiculum in spatial information processing, memory, motivation and the temporal control of  
1114 behaviour. *Prog. Neuropsychopharmacol. Biol. Psychiatry.* 33,782-790.  
1115
- 1116 Ottersen, O. P. (1982). Connections of the amygdala of the rat. IV: Corticoamygdaloid and  
1117 intraamygdaloid connections as studied with axonal transport of horseradish peroxidase. *J. Comp.*  
1118 *Neurol.* 205,30-48.  
1119
- 1120 Padilla-Coreano, N., Bolkan, S.S., Pierce, G.M., Blackman, D.R., Hardin, W.D., Garcia-Garcia, A.L.,  
1121 Spellman, T.J., and Gordon, J.A. (2016). Direct ventral hippocampal-prefrontal input is required for  
1122 anxiety-related neural activity and behavior. *Neuron.* 89,857-866.  
1123
- 1124 Parfitt, G.M., Nguyen, R., Bang, J.Y., Aqrabawi, A.J., Tran, M.M., Seo, D.K., Richards, B.A., and  
1125 Kim, J.C. (2017). Bidirectional control of anxiety-related behaviors in mice: role of inputs arising from  
1126 the ventral hippocampus to the lateral septum and medial prefrontal cortex.  
1127 *Neuropsychopharmacology.* 42,1715-1728.  
1128
- 1129 Paxinos, G., and Franklin, K.B.J. (2012). *The Mouse Brain in Stereotaxic Coordinates* (Elsevier  
1130 Academic Press).  
1131
- 1132 Pierard, C., Dorey, R., Henkous, N., Mons, N., and Béracochéa, D. (2017). Different implications of  
1133 the dorsal and ventral hippocampus on contextual memory retrieval after stress. *Hippocampus.* 27,999-  
1134 1015.  
1135
- 1136 Phillipson, O.T., and Griffiths, A.C. (1985). The topographic order of inputs to nucleus accumbens in  
1137 the rat. *Neuroscience.* 16, 275-296.  
1138
- 1139 Preston-Ferrer, P., Coletta, S., Frey, M., and Burgalossi, A. (2016). Anatomical organization of  
1140 presubicular head-direction circuits. *Elife.* 5, pii: e14592. doi: 10.7554/eLife.14592.  
1141
- 1142 Potvin, O., Allen, K., Thibaudeau, G., Doré, F.Y., and Goulet, S. (2006). Performance on spatial  
1143 working memory tasks after dorsal or ventral hippocampal lesions and adjacent damage to the  
1144 subiculum. *Behav. Neurosci.* 120,413-422.  
1145
- 1146 Riaz, S., Schumacher, A., Sivagurunathan, S., Van Der Meer, M., and Ito, R. (2017). Ventral, but not  
1147 dorsal, hippocampus inactivation impairs reward memory expression and retrieval in contexts defined  
1148 by proximal cues. *Hippocampus.* 27,822-836.  
1149
- 1150 Roy, D.S., Kitamura, T., Okuyama, T., Ogawa, S.K., Sun, C., Obata, Y., Yoshiki, A., Tonegawa, S.  
1151 (2017). Distinct neural circuits for the formation and retrieval of episodic memories. *Cell.* 170, 1000-  
1152 1012.  
1153
- 1154 Saunders, R.C., and Rosene, D.L. (1988a). A comparison of the efferents of the amygdala and the  
1155 hippocampal formation in the rhesus monkey: I. Convergence in the entorhinal, prorrhinal, and  
1156 perirhinal cortices. *J. Comp. Neurol.* 271,153-184.  
1157



- 1158 Saunders, R.C., Rosene, D.L., and Van Hoesen, G.W. (1988b). Comparison of the efferents of the  
1159 amygdala and the hippocampal formation in the rhesus monkey: II. Reciprocal and non-reciprocal  
1160 connections. *J. Comp. Neurol.* 271,185-207.
- 1161
- 1162 Shi, C.J., and Cassell, M.D. (1999). Perirhinal cortex projections to the amygdaloid complex and  
1163 hippocampal formation in the rat. *J. Comp. Neurol.* 406,299-328.
- 1164
- 1165 Strange, B.A., Witter, M.P., Lein, E.S., and Moser, E.I. (2014). Functional organization of the  
1166 hippocampal longitudinal axis. *Nat. Rev. Neurosci.* 15, 655-669.
- 1167
- 1168 Subhadeep, D., Srikumar, B.N., Shankaranarayana Rao, B.S., and Kutty, B.M. (2015). Exposure to  
1169 short photoperiod regime reduces ventral subicular lesion-induced anxiety-like behavior in Wistar rats.  
1170 *Physiol. Behav.* 170,124-132.
- 1171
- 1172 Swanson, L.W., and Cowan, W.M. (1977). An autoradiographic study of the organization of the  
1173 efferent connections of the hippocampal formation in the rat. *J. Comp. Neurol.* 172, 49-84.
- 1174
- 1175 Sweeney, P., and Yang, Y. (2015). An excitatory ventral hippocampus to lateral septum circuit that  
1176 suppresses feeding. *Nat. Commun.* 6,10188. doi: 10.1038/ncomms10188.
- 1177
- 1178 Sweeney, P., and Yang, Y. (2016). An inhibitory septum to lateral hypothalamus circuit that suppresses  
1179 feeding. *J. Neurosci.* 36,11185-11195.
- 1180
- 1181 Tamamaki, N., Abe, K., and Nojyo, Y. (1987). Columnar organization in the subiculum formed by  
1182 axon branches originating from single CA1 pyramidal neurons in the rat hippocampus. *Brain Res.* 412,  
1183 156-160.
- 1184
- 1185 Tang, Q., Buralossi, A., Ebbesen, C.L., Sanguinetti-Scheck, J.I., Schmidt, H., Tukker, J.J., Naumann,  
1186 R., Ray, S., Preston-Ferrer, P., Schmitz, D., and Brecht, M. (2016). Functional architecture of the rat  
1187 parasubiculum. *J. Neurosci.* 36, 2289-2301.
- 1188
- 1189 Tasic, B., Yao, Z., Graybuck, L.T., Smith, K.A., Nguyen, T.N., Bertagnolli, D., Goldy, J., Garren, E.,  
1190 Economo, M.N., Viswanathan, S., et al. (2018). Shared and distinct transcriptomic cell types across  
1191 neocortical areas. *Nature.* 563,72-78.
- 1192
- 1193 Taube, J.S. (2007). The head direction signal: origins and sensory-motor integration. *Annu. Rev.*  
1194 *Neurosci.* 30,181-207.
- 1195
- 1196 Van Hoesen, G.W., and Hyman, B.T. (1990). Hippocampal formation: anatomy and the patterns of  
1197 pathology in Alzheimer's disease. *Prog. Brain Res.* 83,445-457.
- 1198
- 1199 Veening, J. G. (1978). Cortical afferents of the amygdaloid complex in the rat: an HRP study.  
1200 *Neurosci. Lett.* 8,191-195.
- 1201
- 1202 Vranjkovic, O., Pina, M., Kash, T.L., and Winder, D.G. (2017). The bed nucleus of the stria terminalis  
1203 in drug-associated behavior and affect: A circuit-based perspective. *Neuropharmacology.* 122,100-106.
- 1204
- 1205 Wang, J., and Barbas, H. (2018). Specificity of primate amygdalar pathways to hippocampus. *J.*  
1206 *Neurosci.* 38,10019-10041.

1207

1208 Weller, K.L., and Smith, D.A. (1982). Afferent connections to the BNST. *Brain Res.* 232,255-270.

1209

1210 Wassum, K.M., and Izquierdo, A. (2015). The basolateral amygdala in reward learning and addiction.  
1211 *Neurosci. Biobehav. Rev.* 57,271-283.

1212

1213 Witter, M.P. (2006). Connections of the subiculum of the rat: topography in relation to columnar and  
1214 laminar organization. *Behav. Brain Res.* 174,251-264.

1215

1216 Witter, M.P., Ostendorf, R.H., and Groenewegen, H.J. (1990). Heterogeneity in the dorsal subiculum  
1217 of the rat. distinct neuronal zones project to different cortical and subcortical targets. *Eur. J. Neurosci.*  
1218 2,718-725.

1219

1220 Wyss, J.M., and Van Groen, T. (1992). Connections between the retrosplenial cortex and the  
1221 hippocampal formation in the rat: a review. *Hippocampus.* 2,1-11.

1222

1223 Yukie, M. (2000). Connections between the medial temporal cortex and the CA1 subfield of the  
1224 hippocampal formation in the Japanese monkey (*Macaca fuscata*). *J. Comp. Neurol.* 423,282-298.

1225

1226

1227

1228 **Table S1.** Transcriptomic clusters, gene makers and anatomic registration.

1229

1230 **Table S2.** Overall distribution of labeled axon terminals in the target regions of Sub and/or PS.

1231

1232 **Table S3.** Terminology and abbreviations used in this study.

1233

1234 **Table S4.** Comparison of the present and recent subicular studies.

1235

1236

## 1237 **Figure legends**

1238

1239 **Figure 1.** Transcriptomic classification of Sub and PS cell types. **(A)** Microdissection of tissue from  
1240 Sub-PS-HA (region between black bars), PrS-PoS-PaS (region between yellow bars) or all subicular  
1241 complex (all highlighted area) in sequential coronal sections. The inset in the first image shows lack of  
1242 Sub-PS at more anterior levels. The last image shows the reference atlas plate for Sub-PS-HA region  
1243 that matches the third image (\*). Coordinates from Paxinos and Franklin (2012) are indicated at the  
1244 bottom of each panel. **(B)** Unbiased hierarchical clustering of cells from subicular complex (10X).  
1245 OC1-51 indicate corresponding original clusters (OC). Highlighted OC23-44 were re-clustered in C.  
1246 **(C)** Hierarchical re-clustering of cells from Sub-PS-HA region (i.e. cells from OC23-44 in B). RC1-29  
1247 indicate corresponding new cluster numbers from re-clustering (RC). Note that PSpy is closer to  
1248 CA1py and HApy than to Spy at transcriptional level. **(D)** Dot plot of selected gene markers (from 10X  
1249 data) from re-clustering (see Table S1). Color of the dots indicates cluster mean expression (log scale),  
1250 normalize by row by dividing the maximum value per row, so that the maximum normalized value is  
1251 one. Blue to red corresponds to normalized values from zero to one. Size of the dots indicates % cells  
1252 with CPM > 1. Major clusters and marker genes are outlined with colored boxes. S, subiculum; PS,  
1253 prosubiculum; RSg, granular part of retrosplenial cortex; HA, hippocampo-amygdaloid transition area;  
1254 PrSd and PrSv, dorsal and ventral presubiculum; PoS, postsubiculum; PaS, parasubiculum; L2-3, L5,  
1255 L6 and L6b, layers 2-3, 5, 6 and 6b of related cortices; py, pyramidal layer; po, polymorphic layer; Spy,

1256 pyramidal layer of the subiculum; Spo, polymorphic layer of the subiculum; PSp<sub>py</sub>, pyramidal layer of  
1257 the PS; PSp<sub>py-de</sub>, deep portion of the pyramidal layer of PS; PSp<sub>py-su1</sub>, the most superficial portion of  
1258 the pyramidal layer of PS; PSp<sub>py-su2</sub>, superficial portion of the pyramidal layer of PS; PSp<sub>po</sub>,  
1259 polymorphic layer of PS; CA1<sub>py</sub>, pyramidal layer of hippocampal field CA1; HA<sub>py</sub>, pyramidal layer of  
1260 the HA. For other abbreviations see Table S3.

1261  
1262 **Figure 2.** Major transcriptomic clusters mapped to anatomic regions. Black lines mark the areal  
1263 borders in each panel. (A-F) Marker genes selectively or predominantly expressed in with no or few  
1264 expressed cells in PSp<sub>py</sub>. The inset in (F) shows the different cell shapes and sizes between py and po.  
1265 (G-L) Marker genes selectively or predominantly expressed in PSp<sub>py</sub> with no or few expressed cells in  
1266 Sp<sub>py</sub>. (M-R) Marker genes selectively or predominantly expressed in Spo and/or PSp<sub>po</sub> with no or few  
1267 expressed cells in Sp<sub>py</sub> and PSp<sub>py</sub>. (S) corresponding transcriptomic clusters revealed with SMART-seq,  
1268 which is largely consistent with the results from 10X in Figure 1D. (T) *Thsd7b* expression in layer 6  
1269 (L6) of HA and EC. Bars: 210µm in A (for A-R and T); 95µm in the inset in F. For abbreviations see  
1270 Table S3.

1271  
1272 **Figure 3.** Borders, extent and topography of dorsal and ventral Sub and PS. (A-M) Borders, extent and  
1273 topography of dorsal Sub and PS on *Nts* sequential rostral-caudal ISH sections. *Nts* is predominantly  
1274 expressed in the pyramidal layer (py) of dorsal Sub (Sd in A-K) and ventral Sub (Sv in L) with no or  
1275 few expressed cells in dorsal and ventral PS (PSd and PSv). Note that the polymorphic layer (po) of  
1276 both dorsal and ventral Sub does not express *Nts*. (N-R) Borders, extent and topography of ventral Sub  
1277 and PS on *Ntng2* sequential ISH sections. *Ntng2* is predominantly expressed in PS. Note that the  
1278 ventral PS (PSv) is easily distinguishable from ventral Sub (Sv). The extent (width) of Sub decreases  
1279 from dorsal (A) to ventral (M) while opposite is true for PS. The most dorsal part (\* in A) contains only  
1280 Sub while the most ventral part (\*\* in I, J, N, O) contains only PS (this finding is obviously observed  
1281 in sequential sagittal sections shown in Figure S4). Note also that the color-coded po of Sub and PS in  
1282 Fig. 3A-M contains cells from deeper layers L6-L6b (for Sub) or L6b (for PS) for concise illustration.  
1283 Bar: 350µm in A (for A-R). Coordinates from Paxinos and Franklin (2012) are indicated at the bottom  
1284 of each panel. For abbreviations see the list in Table S3.

1285  
1286 **Figure 4.** Comparison of overall projection patterns of Sub, PS and CA1. Detected fluorescent signals  
1287 in each case were projected onto the lateral view of the Allen Mouse CCF template (Atlas.brain-  
1288 map.org). The black circle with a red cross in each case indicates the injection site. (A-D) Projection  
1289 patterns of the dorsal (A) and ventral (B-D) Sub in four representative cases. Axon terminal projections  
1290 to RSg, PrS, PaS, MEC, AV and MM are observed in all Sub cases (see Figure 5 for detailed images of  
1291 the *Trib2-F2A-CreERT2* mouse in C). Note the dorsal injection (in A) also includes part of the  
1292 underlying DG which results in terminal labeling in CA3. Note that some retrogradely labeled neurons  
1293 were present occasionally in LEC and AV (white asterisks in A and B). The black dot in D indicates  
1294 some injection contamination in V1. (E-H) Projection patterns of the dorsal (E) and ventral (F-H) PS in  
1295 four representative cases. Axon terminal projections to LEC, IL, VS, Amy and AON are seen in all PS  
1296 cases while those to BST and hypothalamus (Hy) are found in all PSv cases (see Figure 6 for detailed  
1297 images of a *Syt17-Cre\_NO14* mouse). (I-L) Projection patterns of the dorsal (I) and ventral (J-L) CA1  
1298 in four representative cases. In general, CA1 shows somewhat similar projection patterns to PS but not  
1299 to Sub. (M) Quantitative comparison of Sub (blue bars) and PS (orange bars) projections. Note the  
1300 obvious differential projection targets of Sub vs. PS. For abbreviations see Table S3.

1301  
1302 **Figure 5:** Limited efferent projections from ventral Sub (Sv). The overall projection pattern of this  
1303 case was shown in Figure 4C. (A) A rAAV injection site in Sv (# marks the center of the injection) in a  
1304 *Trib2-F2A-CreERT2* mouse. This injection lies in the ventral Sub marked by Sv in Figure 3L, Q. (B)

1305 Terminal labeling in layers 2-3 of RSg. (C) Terminal labeling in middle AV and AM but not in AD. (D)  
1306 Absence of terminal labeling in AON. (E) Fiber labeling in the dorsal PrS (The fibers pass through PrS  
1307 to RSg) and strong terminal labeling in ventral PrS. (F) Terminal labeling in LS with no labeling in VS.  
1308 (G) Absence of labeling in BST; (H) Terminal labeling in area prostriata (Pro), ventral PaS, and  
1309 ventromedial MEC (mostly in layer 5); (I) Absence of labeling in PRC. (J) Terminal labeling in the  
1310 anterior AV with no labeling in PaT, PT and supraoptic hypothalamic regions. (K) Absence of labeling  
1311 in PL and IL. (L) Absence of labeling in the tuberal region (DMH and VMH) of the hypothalamus. (M)  
1312 Terminal labeling in the ventral portion of MM. (N) Absence of labeling in the amygdala. (O)  
1313 Quantitative comparison of Sub projections in this case (*Trib2-F2A-CreERT2*, blue bars) and in two  
1314 wild-type cases (Wild types 1 and 2, orange and grey bars). Note the similar projection patterns of  
1315 these cases and limited number of target regions from Sub. Bar: 280µm in A (for A-N). For  
1316 abbreviations see Table S3.

1317  
1318 **Figure 6.** Widespread efferent projections from ventral PS (PSv). (A) A rAAV injection site in the  
1319 ventral PS (# marks the center of the injection) of a *Syt17-Cre\_NO14* mouse. This injection lies in the  
1320 most ventral PS marked by \*\* in Figure 3I, N. (B-N) Axon terminal labeling in PL, IL (B), LEC (C,  
1321 mainly in layers 2-3, 5 and 6), LS, VS (D), BST (E), AOB (F, mainly in its granular layer, AOBgr),  
1322 RSg, PrSd (G, no labeling), PT (H), PRC (I), AON (J), Re, ZI, AHN, SCh (K), ventral PH, lateral PMv  
1323 (L), La, anterior BL, BM, Me, CeM, ASTA (M), AHi, posterior BL and CoP (N). Note much fewer  
1324 labeling in major island of Island of Calleja (ICjM, D), PaT (H), PaH (K), PMd (L) and CeL (M). Note  
1325 also the absence of labeling in AM (H). Overall distribution pattern of the labeled terminals in this case  
1326 is similar to that in *Vipr2-Cre\_KE2* case shown in Figure 4H except strong AM labeling in the latter.  
1327 Bars: 200µm in B (for B-E, I, J); 280 µm in F (for F and H); 140µm in G; 200µm in K (for K and L);  
1328 200µm in M (for M and N). For abbreviations see Table S3.

1329  
1330 **Figure 7.** Summary of distinct circuits and transcriptomic cell types of Sub and PS. (A) Differential  
1331 inputs and outputs of Sub and PS in the context of the entire hippocampal circuits. Sub mostly projects  
1332 to regions important for spatial processing and navigation while PS mostly to widespread brain regions  
1333 critical for reward, emotion, stress, motivation, anxiety and fear. Note that the PS but not Sub  
1334 projections show obvious dorsoventral (DV) difference and that both PS and Sub display topographic  
1335 projections to most of their targets. Potential convergence of Sub and PS projections may exist in AM,  
1336 RE, MM and LS. The Hypothal indicates most of the hypothalamic regions including MM. Clau-En,  
1337 claustrum and endopiriform nucleus. (B) Laminar organization of the inputs and outputs of Sub and PS  
1338 with relation to cell types. PrS and MEC project to the molecular layer (m) while AV-AM of the  
1339 anterior thalamus to the polymorphic layer (po) of Sub. CA1 projects to all layers of Sub. In PS, inputs  
1340 from LEC, Amy, Pir and Re mainly project to the molecular layer while those from PaT-PT of the  
1341 thalamus mainly innervate the pyramidal layer (py). Inputs from hippocampal CA3 and CA1 project to  
1342 all layers. As for outputs, the polymorphic layer of Sub and PS projects to differential subdomains of  
1343 the thalamic nuclei (AV, AM and Re) while the pyramidal layer of each innervates distinct cortical and  
1344 subcortical targets. (C) Simplified summary of the molecular markers and connectivity of Sub and PS  
1345 along DV axis. Note the complementary gradient in size of Sub and PS along DV axis: Sub dominates  
1346 the dorsal portion while PS dominates the ventral portion of the hippocampus.

1347  
1348  
1349 **Figure S1.** Heat map of selected gene markers from the original and re-clustering of transcriptomic  
1350 data and ISH confirmation. **Related to Figures 1 and 2.** (A) Transcriptomic heat map of selected gene  
1351 markers from original clustering (OC1-51). (B) Heat map of selected gene markers from re-clustering  
1352 (RC1-29). (C-N) ISH confirmation of marker gene expression in sub-regions of HA (C-F), Sub (G-J)  
1353 and the border region of Sub and PS (K-N). Strong and weak expression of *Gpc3*, *Unc5d* and *Lpl* was

1354 observed in HA and PSv, respectively (C-E). Note Car10 expression in superficial HA-py and HAL6 (\*  
1355 in F). In Spy, *Cntn6* (RC1) and *Scn4b* (RC2) are expressed in distal two-thirds while *Glr3* (RC3) in  
1356 proximal one-third (\* in H-J). Interestingly, *C1ql2* is expressed in the superficial Sv at the border with  
1357 PSv (\*\* in K; RC4) but not at further caudal levels. *Alk* is expressed in the superficial PSv at the border  
1358 with Sv (\*\* in M; RC5) but not at further rostral levels (L). Arrows in G point to layer 6b in Sub and  
1359 PrS (OC49-50). Bar in C: 350 $\mu$ m (for C-N). For abbreviations see Table S3.

1360

1361 **Figure S2.** Confusion matrix and tSNE analysis. **Related to Figure 1.** (A) Comparison of the clusters  
1362 identified in the present study and in Cembrowski et al. (2018b). This confusion matrix analysis  
1363 indicates that the 9 clusters identified in Cembrowski et al. (2018b) partially map to the 29 clusters,  
1364 mainly at subclass levels, identified in the preset study. See the Methods section for detailed workflow  
1365 of this analysis. (B) Hierarchical and basic transcriptomic cell types shown in tSNE. Note that in PSpY,  
1366 three major subclasses can be easily identified: PSpY-su1, PSpY-su2 and PSpY-de, and within these  
1367 subclasses, multiple clusters are also found (for details of each cluster see Figure 1 and Table S1). For  
1368 abbreviations see Table S3.

1369

1370 **Figure S3.** Marker genes for sub-types of PS and their spatial localizations. **Related to Figures 1 and**  
1371 **2.** (A) Heat map of selected marker genes expressed in subdomain of PS. Expression of selected genes  
1372 (asterisks) in PS are shown in B-Z. (B-Z) ISH confirmation of marker gene expression in different  
1373 sublayers of PS. (B-F) *Cbln4* expression in most superficial PSpY (see RC20-23 in A); (G-K) *Dlk1*  
1374 expression in superficial PSpY (RC10-14) and HApY (RC17-18); (L-P) *Tgfb2* expression in most  
1375 superficial and superficial PSpY (RC11-14 and RC21-23); (Q-R) *Cxcl12* expression in the most ventral  
1376 part of superficial PSpY (RC14) and HApY (RC17-19); (S-U) *Col25a1* expression in superficial PSpY;  
1377 (V-Z) *Rprm* expression in deep PSpY (RC6-8). Bar in B: 350 $\mu$ m (for B-Z). For abbreviations see Table  
1378 S3.

1379

1380 **Figure S4.** Borders, extent and topography of Sub and PS in sequential sagittal sections. **Related to**  
1381 **Figure 3.** (A-H) Delineation of the borders of Sub, PS and CA1 from medial (A) to lateral (H)  
1382 sequential sagittal sections stained for *Calb1* (PS marker). (I-O) Delineation of the borders of Sub, PS  
1383 and CA1 from medial (I) to lateral (O) sequential sagittal sections stained for *Bcl6* (Sub marker). (P)  
1384 *Fnl* ISH (another Sub marker) stain on a section corresponding to panel H. Note the complementary  
1385 locations and different size (width) of the dorsal and ventral Sub and PS. (Q) A schematic drawing  
1386 showing the DV difference and gradient of the size and extent of Sub (blue color) and PS (orange  
1387 color) and representative genes selectively expressed in Sub and PS. Note that the most dorsomedial  
1388 part (\*) contains only Sub while the most ventrolateral part (\*\*) contains only PS. Bar in A: 300 $\mu$ m  
1389 (for A-P). Coordinates from Paxinos and Franklin (2012) are indicated at the bottom of each panel. For  
1390 abbreviations see Table S3.

1391

1392 **Figure S5.** Comparison of the projections from Sd and Sv. **Related to Figures 4 and 5.** (A1-I2)  
1393 Topographic projections from the most dorsal (A1, B1, ..., I1) and the most ventral (A2, B2, ..., I2)  
1394 Sub. *Slc17a7*-IRES2-Cre (Figure 4A) for dorsal Sub injection and *Grik4*-Cre (another case ventral to  
1395 Figure 4B) for the ventral Sub injection. The most dorsal Sub injection (in B1) results in terminal  
1396 labeling in the most rostradorsal RSg (A1), most dorsal PrS (C1), most dorsorostral MM (D1, E1, F1),  
1397 most dorsal PaS (G1) and most dorsolateral MEC (H1, I1). In sharp contrast, the most ventral Sub  
1398 injection (in I2) results in terminal labeling in the most caudoventral RSg (A2, B2, C2), most ventral  
1399 PrS (I2), most ventrocaudal MM (D2, E2, F2), most ventral PaS (G2, H2), most ventromedial MEC  
1400 (H2). A1 and A2, B1 and B2, ..., I1 and I2 are sections at about the corresponding levels from the two  
1401 Sub cases. (J1 and J2) Converging terminal labeling in the dorsal Re from both dorsal (J1) and ventral  
1402 (J2) sub injections in two wild-type mice. Note no or few labeling is seen in the ventral Re, which

1403 instead receives projections from the PS (see Figure 6K). Bar: 233 $\mu$ m in A1 (for all panels). For  
1404 abbreviations see Table S3.

1405  
1406 **Figure S6.** Cell type specific projections of Sub and PS. **Related to Figures 4 and 6.** Examples of  
1407 mouse Cre-lines and related gene expression in injection sites of Sub, PS and CA1. Names of the genes  
1408 (or genes whose promoters drive the Cre or tdTomato expression) are marked at top right corner of  
1409 each panel. The asterisk in each panel indicates the center of the injection site. Overall projection  
1410 patterns from these injections are shown in Figure 4 and Figure S6T-X. **(A-K)** Gene expression in  
1411 related injection sites (indicated by asterisks). **(L-Q)** Gene expression in the polymorphic layer (po) of  
1412 PS (L, *Rxfp2*; M, *Ill1ra2*) and Sub (N, *Rorb*; O, *Nrep*; P, *Plxnd1*; Q, *Drd1a*). **(R and S)** Axon terminal  
1413 labeling in AV and AM of the thalamus after rAAV injections in the po of Sv (Inset in R, *Plxnd1*-  
1414 Cre\_OG1 mouse) and Sd (Inset in S, *Drd1a*-Cre\_EY262 mouse). **(T-X)** Overall projection patterns  
1415 from additional 5 cases with injections involved in two or three regions: Sv and MEC injections in T, U  
1416 and W; Sd and PrSd injection in V; Sv, PSv and MEC injections in X. Note that *Slc17a6*-IRES-Cre  
1417 neurons in Sub do not appear to project to LS (V, W). In contrast, when the injection contains both Sub  
1418 and PS strongly labeled terminals were observed in LS as well as VS and hypothalamus (X) with no or  
1419 few labelling in IL and AON. **(Y)** An injection restricted in the most distal portion of Spo in Sd (Inset)  
1420 of a *Slc17a7*-IRES2-Cre mouse resulted in axon terminal labeling only in the AV (\*) with no labeling  
1421 in AM. Interestingly, when an injection was placed in the most distal portion of Sd (both Spy and Spo)  
1422 in a wild-type mouse, labeled axon terminals were only observed in AV, in addition to typical target  
1423 labeling in RSg, MEC, PrS, PaS, Pro and MM (Table S2). The black circle with a red cross in each case  
1424 indicates the injection site. Bars: 333 $\mu$ m in A and E; 395 $\mu$ m in B (for B, D, H), 420 $\mu$ m in C (for C and  
1425 K); 300 $\mu$ m in F; 350 $\mu$ m in G (for G, I, J). 300 $\mu$ m in L (for L-Q); 140 $\mu$ m in R (for R, S and Y). For  
1426 abbreviations see Table S3.

1427  
1428 **Figure S7.** Cre-dependent anterograde viral tracing. **Related to Figures 6 and 7.** **(A-C)** A large  
1429 injection in PS (“inj” in B) results in no terminal labeling in the amygdala (C) of a *Slc17a6*-IRES-Cre  
1430 mouse, in which *Slc17a6* is expressed in Sub and deep PS (A). **(D-F)** An injection in PS (“inj” in E)  
1431 results in terminal labeling in basolateral nucleus (BL) of the amygdala (F) of a *Calb1*-IRES2-Cre  
1432 mouse, in which *Calb1* is expressed in the superficial two third of PS (D). **(G-I)** An injection in PS  
1433 (“inj” in H) results in terminal labeling in both BL and BM (basomedial nucleus) of the amygdala (I) of  
1434 a *Ntng2*-IRES2-Cre mouse, in which *Ntng2* is expressed in both superficial and deep PS (G). **(J-M)** A  
1435 small injection in CA3 (“inj” in K) results in terminal labeling in both CA1 and PS of a *Grp*-Cre-  
1436 KH288 mouse, in which *Grp* is expressed in CA3 (J). The image in M is a higher power view of the  
1437 image in (L). The asterisks in (M) indicate the cell-dense band in the superficial pyramidal layer of  
1438 CA1. Bars: 300  $\mu$ m in A (for A-L); 200 $\mu$ m in M.

1439  
1440 **Figure S8.** Topographic projections from Sub and PS to AV and AM. **Related to Figures 4 and 7.** **(A0-**  
1441 **A4)** Projections from the most dorsal PS-CA1 (injection site # in A0) to AM (A1-A4) of a wild-type  
1442 mouse. Labeled terminals are mostly seen in the most caudolateral AM (A3, A4). **(B0-B4)** Projections  
1443 from PSv (injection site # in B0) to AM (B1-B4) in a *Drd3*-Cre\_KI196 mouse. Labeled terminals are  
1444 found in the rostromedial portion of AM (B2, B3). **(C0-C4)** Projections from the most dorsal Sub  
1445 (injection site # in C0) to AV and AM (C1-C4) of a *Drd1a*-Cre\_EY262 mouse. Labeled terminals are  
1446 mostly seen in the most caudolateral AV and AM (C3, C4). **(D0-D4)** Projections from the ventral Sub  
1447 (injection site # in D0) to AV and AM (D1-D4) in a *Trib2*-F2A-CreERT2 mouse. Labeled terminals are  
1448 found in the rostromedial portion of AV and AM (D1, D2, D3). **(E0-E4)** Projections from the most  
1449 ventral Sub (injection site # in E0) to AV and AM (E1-E4) in a wild-type mouse. Labeled terminals are  
1450 found in the most rostromedial portion of AV and AM (E1, E2). Bars: 560 $\mu$ m in A0 (for A0-E0);  
1451 200 $\mu$ m in A1 (for all others). For abbreviations see Table S3.

1452

1453 **Figure S9.** Topographic projections from PS to LS, VS and amygdala. **Related to Figures 6 and 7. (A-**  
1454 **D)** Projections from PSd to LS and VS of a *Ppp1r17*-Cre\_NL146 mouse. Labeled terminals are mostly  
1455 seen in the dorsomedial LS (C, D) and lateroventral VS (A-D). **(E-H)** Projections from PSv to LS and  
1456 VS of a *Ntng2*-IRES2-Cre mouse. Labeled terminals are mostly seen in the ventrolateral LS (G, H) and  
1457 mediadorsal VS (E-H). **(I-K)** Projections from PSd to the amygdala and LEC of the *Ppp1r17*-  
1458 Cre\_NL146 mouse. Labeled terminals are clearly seen in the dorsal portion of LEC (I-K) as well as in  
1459 the anterior portion of BM (BMA)(I) and the lateral portion of the posterior BL (BLP) (J, K) of the  
1460 amygdala. **(L-N)** Projections from PSv to the amygdala and LEC of the *Ntng2*-IRES2-Cre mouse.  
1461 Labeled terminals are clearly observed in the ventral portion of LEC (L-N) as well as in BMP and the  
1462 medial portion of BLP (M, N) of the amygdala. La, Me and CeM also contain labeled terminals.  
1463 Bar:350µm in A (for A-N). For abbreviations see Table S3.

1464

1465 **Figure S10.** Comparison of the afferent projections to PS and Sub. **Related to Figure 7. (A-D)**  
1466 Amygdaloid projections to PSv with no labeling to Sv. An injection in CoP (# in the inset of A) of a  
1467 WT mouse results in clear terminal labeling in CA1v and PSv (see the asterisk in overall projection  
1468 map in A and the labeled terminals in C) but not in Sv (D). An injection in BM (# in the inset of B) of a  
1469 WT mouse results in strong terminal labeling in CA1v and PSv (see the asterisk in overall projection  
1470 map in B). **(E-H)** LEC projections mainly target PS rather than Sub. An injection in LEC (# in the inset  
1471 of E) of a *Cux2*-IRES-Cre mouse results in heavy terminal labeling in PSv (see the asterisk in overall  
1472 projection map in E and the labeled terminals in G) but mostly fiber labeling in Sv (H). An injection in  
1473 LEC of an *Otof*-Cre mouse similarly results in strong terminal labeling in PSv (see the asterisk in  
1474 overall projection map in F). **(I)** An injection in dorsal CA3 of a *Dlg3*-Cre\_KG118 mouse results in  
1475 strong terminal labeling in PSd but not Sd. **(J)** An injection in ventral CA3 (# CA3v) of a *Syt17*-  
1476 Cre\_NO14 mouse results in heavy terminal labeling in PSv but not in Sv (not shown). **(K, L)** An  
1477 injection in Re (# in the inset in L) of a WT mouse results in strong terminal labeling in PSv (K) but  
1478 few in Sv (L). **(M, N)** An injection in MEC (# in the inset of N) of a *Cux2*-IRES-Cre mouse results in  
1479 heavy terminal labeling in Sv (see the labeled terminals in N) but mostly fiber labeling in PSv (M). **(O)**  
1480 An injection in AV (# in the inset of O) of a *Gpr26*-Cre\_KO250 mouse results in terminal labeling in  
1481 the polymorphic layer (po) of Sd and Sv (not shown) but not in PSd or PSv. **(P)** A small injection in the  
1482 dorsal MEC (# in the inset of P) of a *Pcdh9*-Cre\_NP276 mouse results in terminal labeling in the  
1483 molecular layer (m-l) of Sd but not in PSv. **(Q, R)** Strong terminal labeling in Sd (all layers) and MEC  
1484 (layers 5-6) after a dorsal CA1 injection (inset in Q) in a *Gpr26*-Cre\_KO250 mouse (See Figure 4I). **(S-**  
1485 **U)** An injection in ventral CA1 (S) and resulting terminal labeling in all layers of PSv (T) and Sv (U).  
1486 **(V)** quantitative comparison of the afferent projections to Sub (blue bars) and PS (orange bars) from  
1487 different origins. Note that the labeling of both passing axon fibers and axon terminals in panels H and  
1488 M was included in the quantitative analysis. Bar: 200 µm in C (for All panels except A, B, E, F). For  
1489 abbreviations see Table S3.

1490

1491 **Figure S11.** Summary and comparison of recently published studies (A, B) with the present study (C,  
1492 D). **Related to Figures 1, 3 and 7.** It is clear that in the dorsal part, distal and proximal “Sub” (S-dis  
1493 and S-pro in A), or SUBdd and ProSUB (in B), or Sd and PSd (in C and D) can be consistently  
1494 identified across research groups. However, in the ventral part, major difference exists between the  
1495 previous (A, B) and the present (C, D) studies. In A, the ventral “Sub” (S-ven) could not be subdivided  
1496 into distal and proximal parts. In B, the ventral “Sub” could be subdivided into “SUBv” and “SUBvv”,  
1497 in contrast to the dorsal part, which was subdivided into SUB and ProSUB (i.e., PS). In the present  
1498 study, the ventral “Sub” is mostly occupied by PSv and HA (see the left two panels in C and D). The  
1499 ventral Sub we define is located only at the caudal levels (see the right two panels in C and D). Our  
1500 reason for this segmentation is based on the fact that the PSv region expresses marker genes of PSD

1501 (e.g. *Ntng2* and *S100a10*) but not those (e.g., *Nts* and *Bcl6*) of Sd (or S-dis in A or SUBdd in B). The  
1502 PS and Sub re-defined in the present study are found to have differential connectivity, cell types and  
1503 functional correlation, as demonstrated in detail here. In addition, since S-dis and S-pro were never  
1504 clearly defined in previous studies it is impossible to simply replace PSv with ventral S-pro or replace  
1505 Sv with ventral S-dis. Thus, the dorsal and ventral parts of Sub and PS we define here enable  
1506 consistency at transcriptomic, connectional and functional levels along the entire DV axis.  
1507





Figure 2

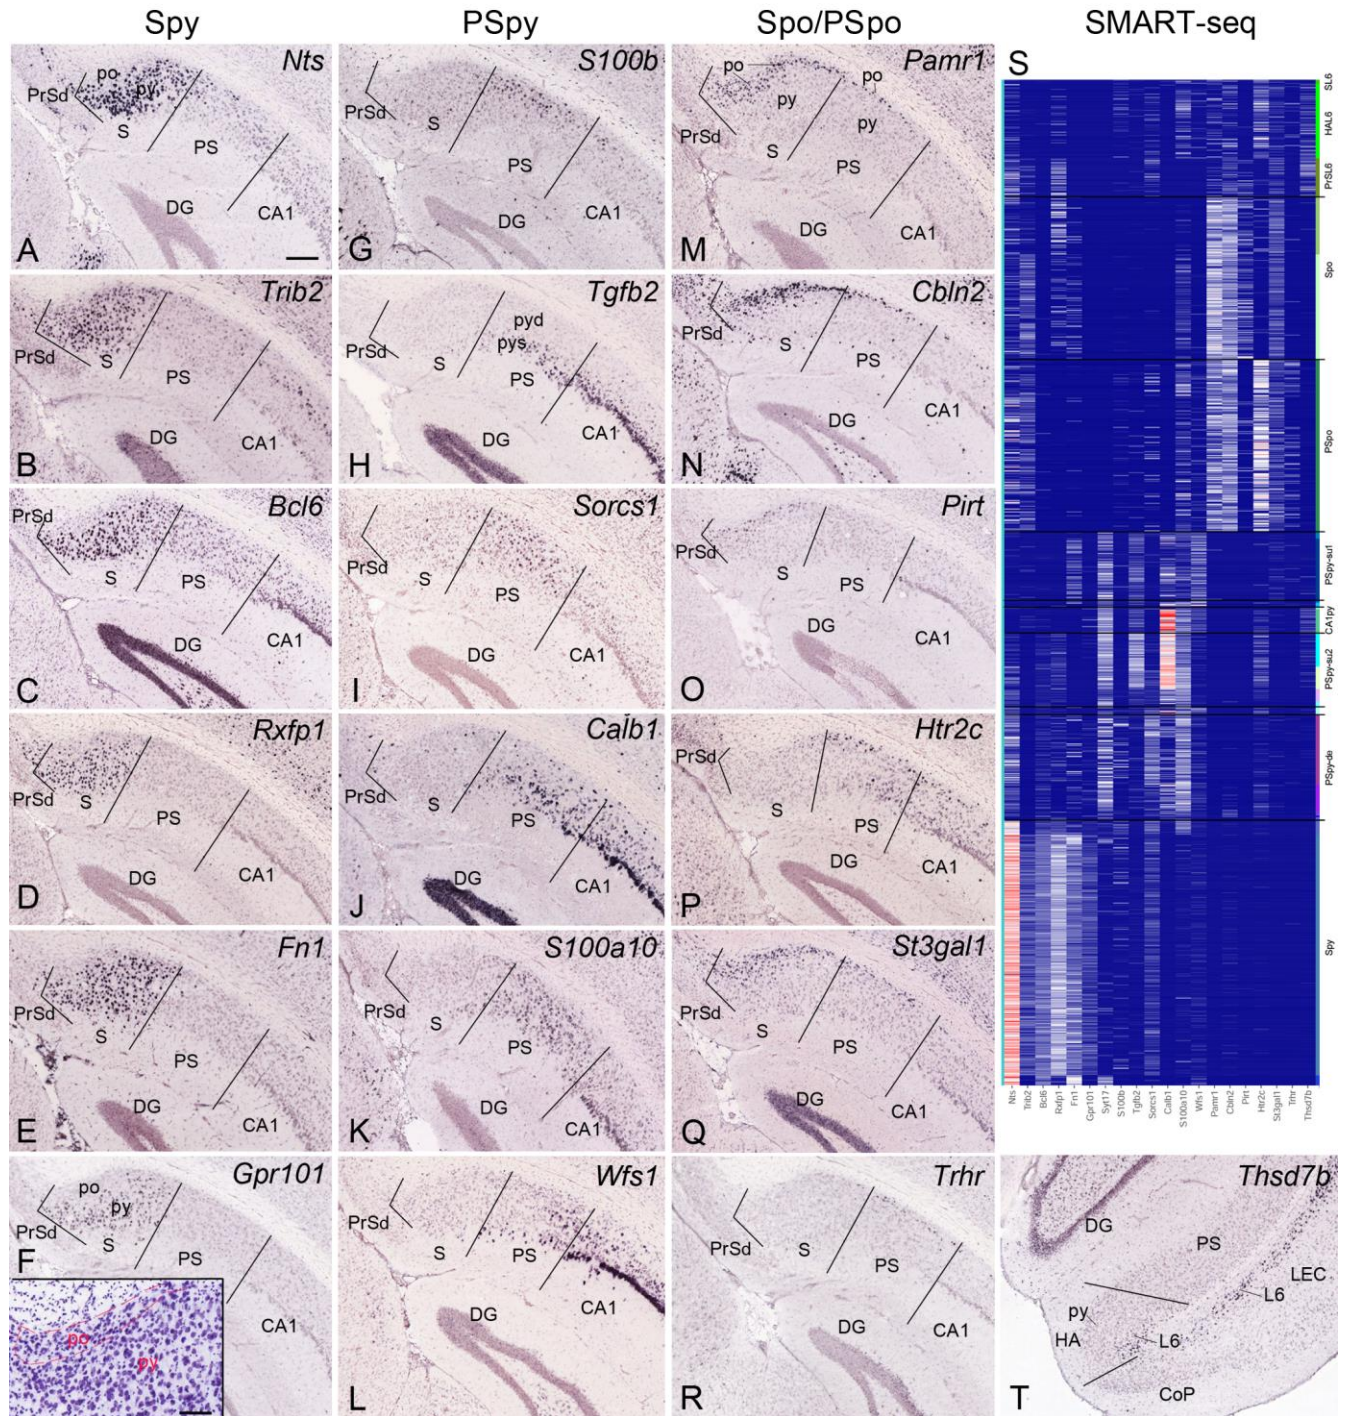

1509  
1510  
1511  
1512  
1513  
1514  
1515  
1516  
1517

Figure 3

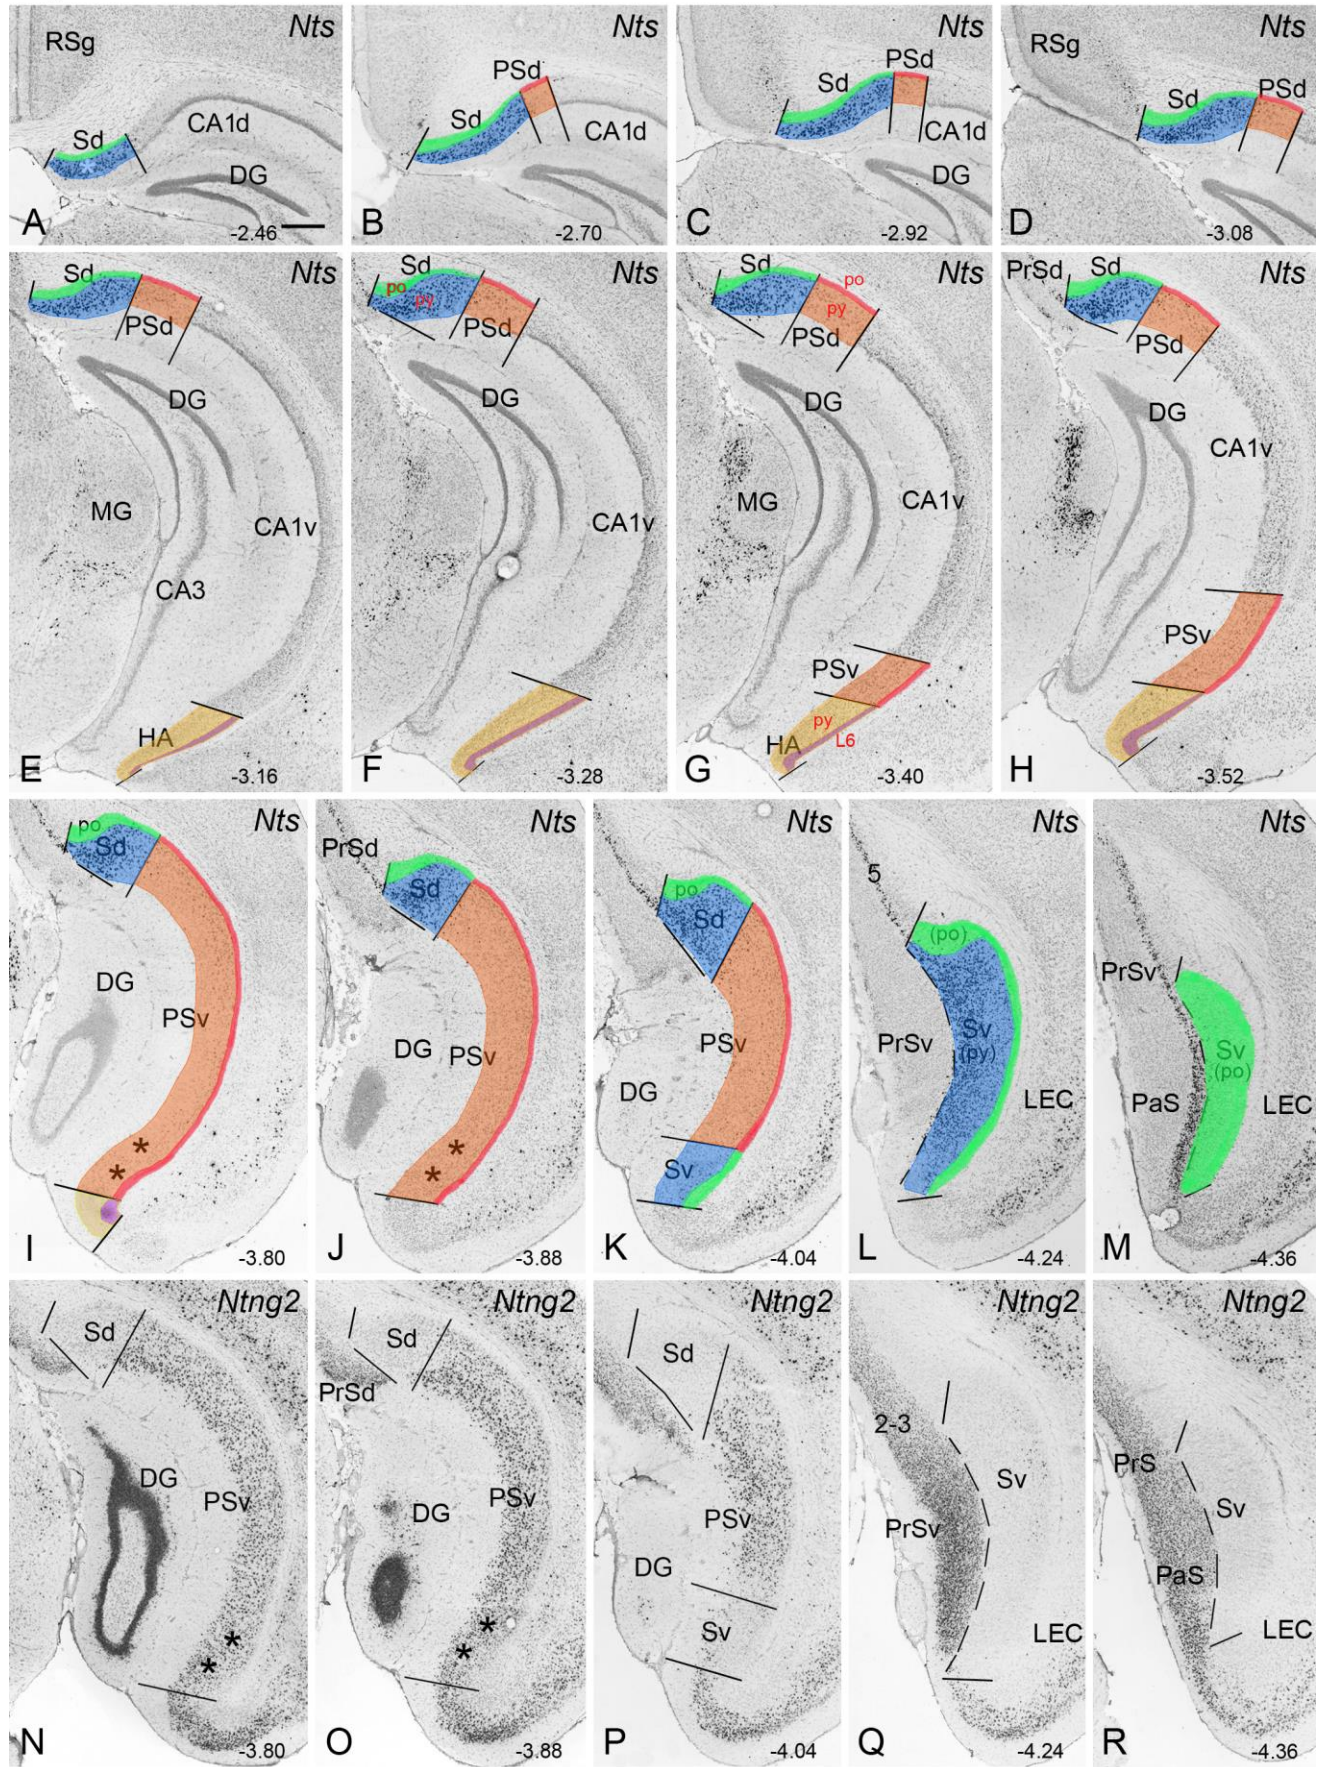

Figure 4

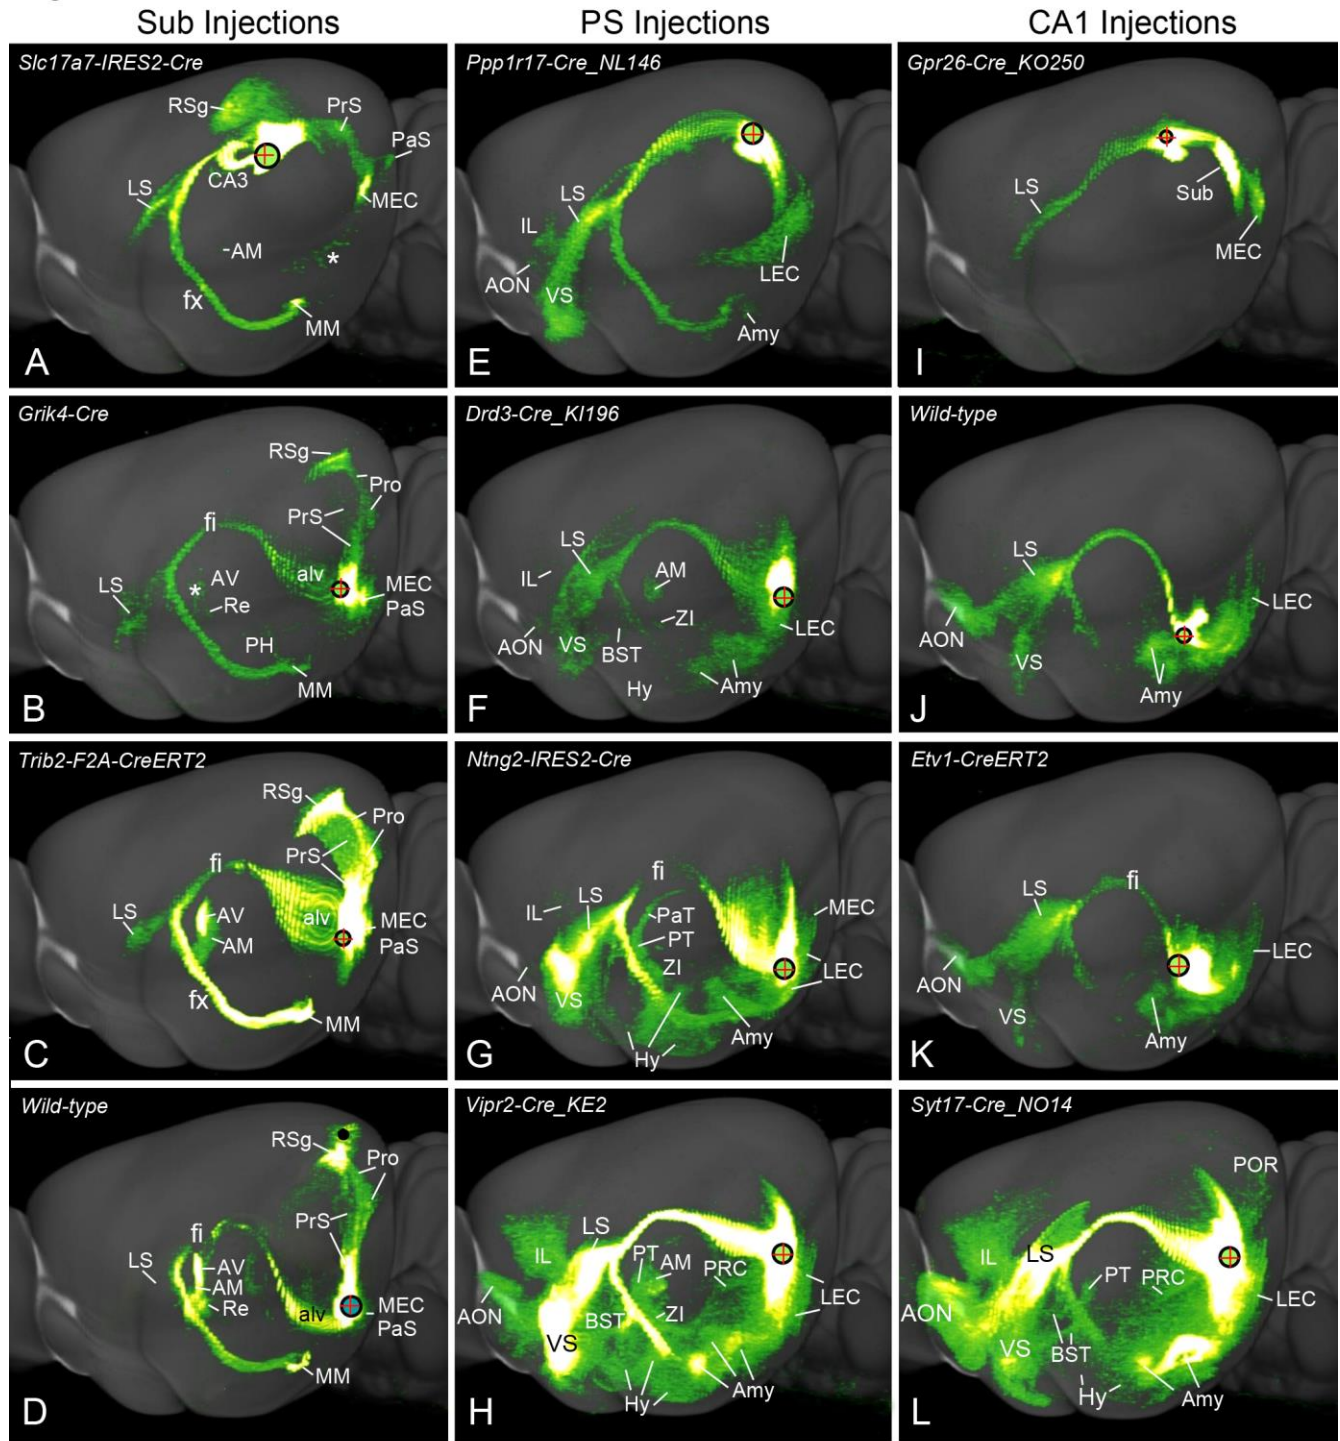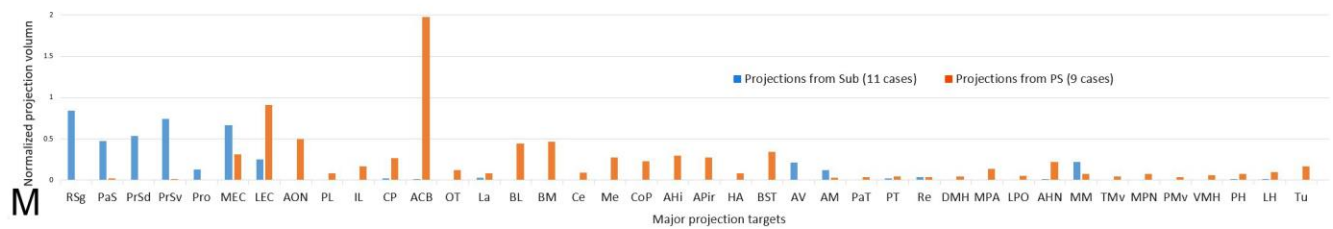

1519  
1520  
1521

Figure 5

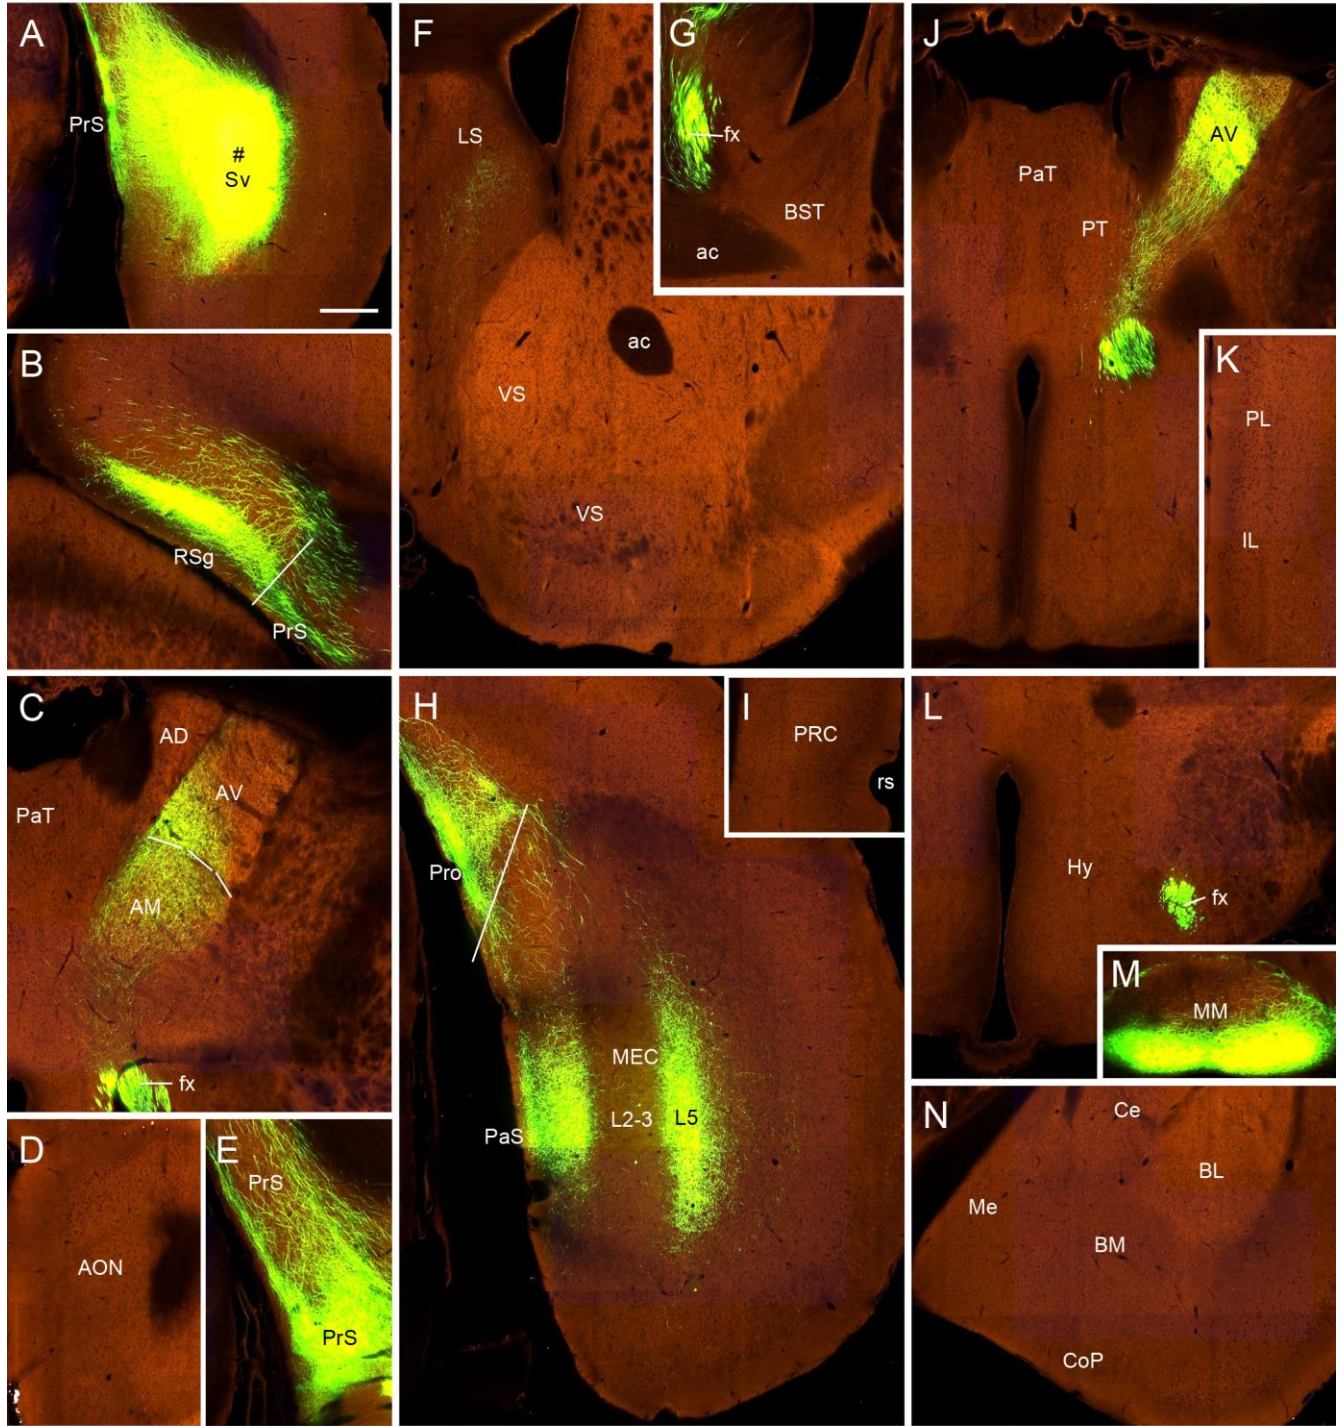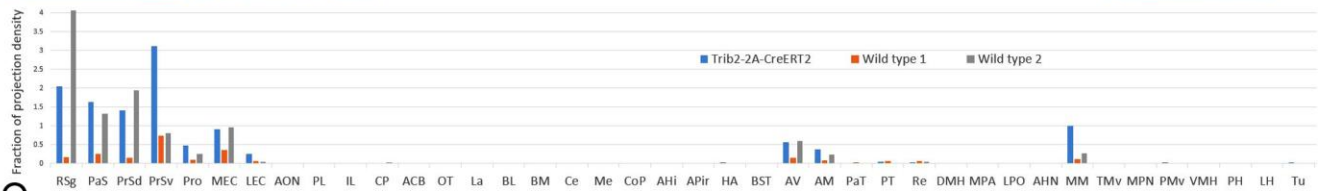

1522  
1523  
1524  
1525

Figure 6

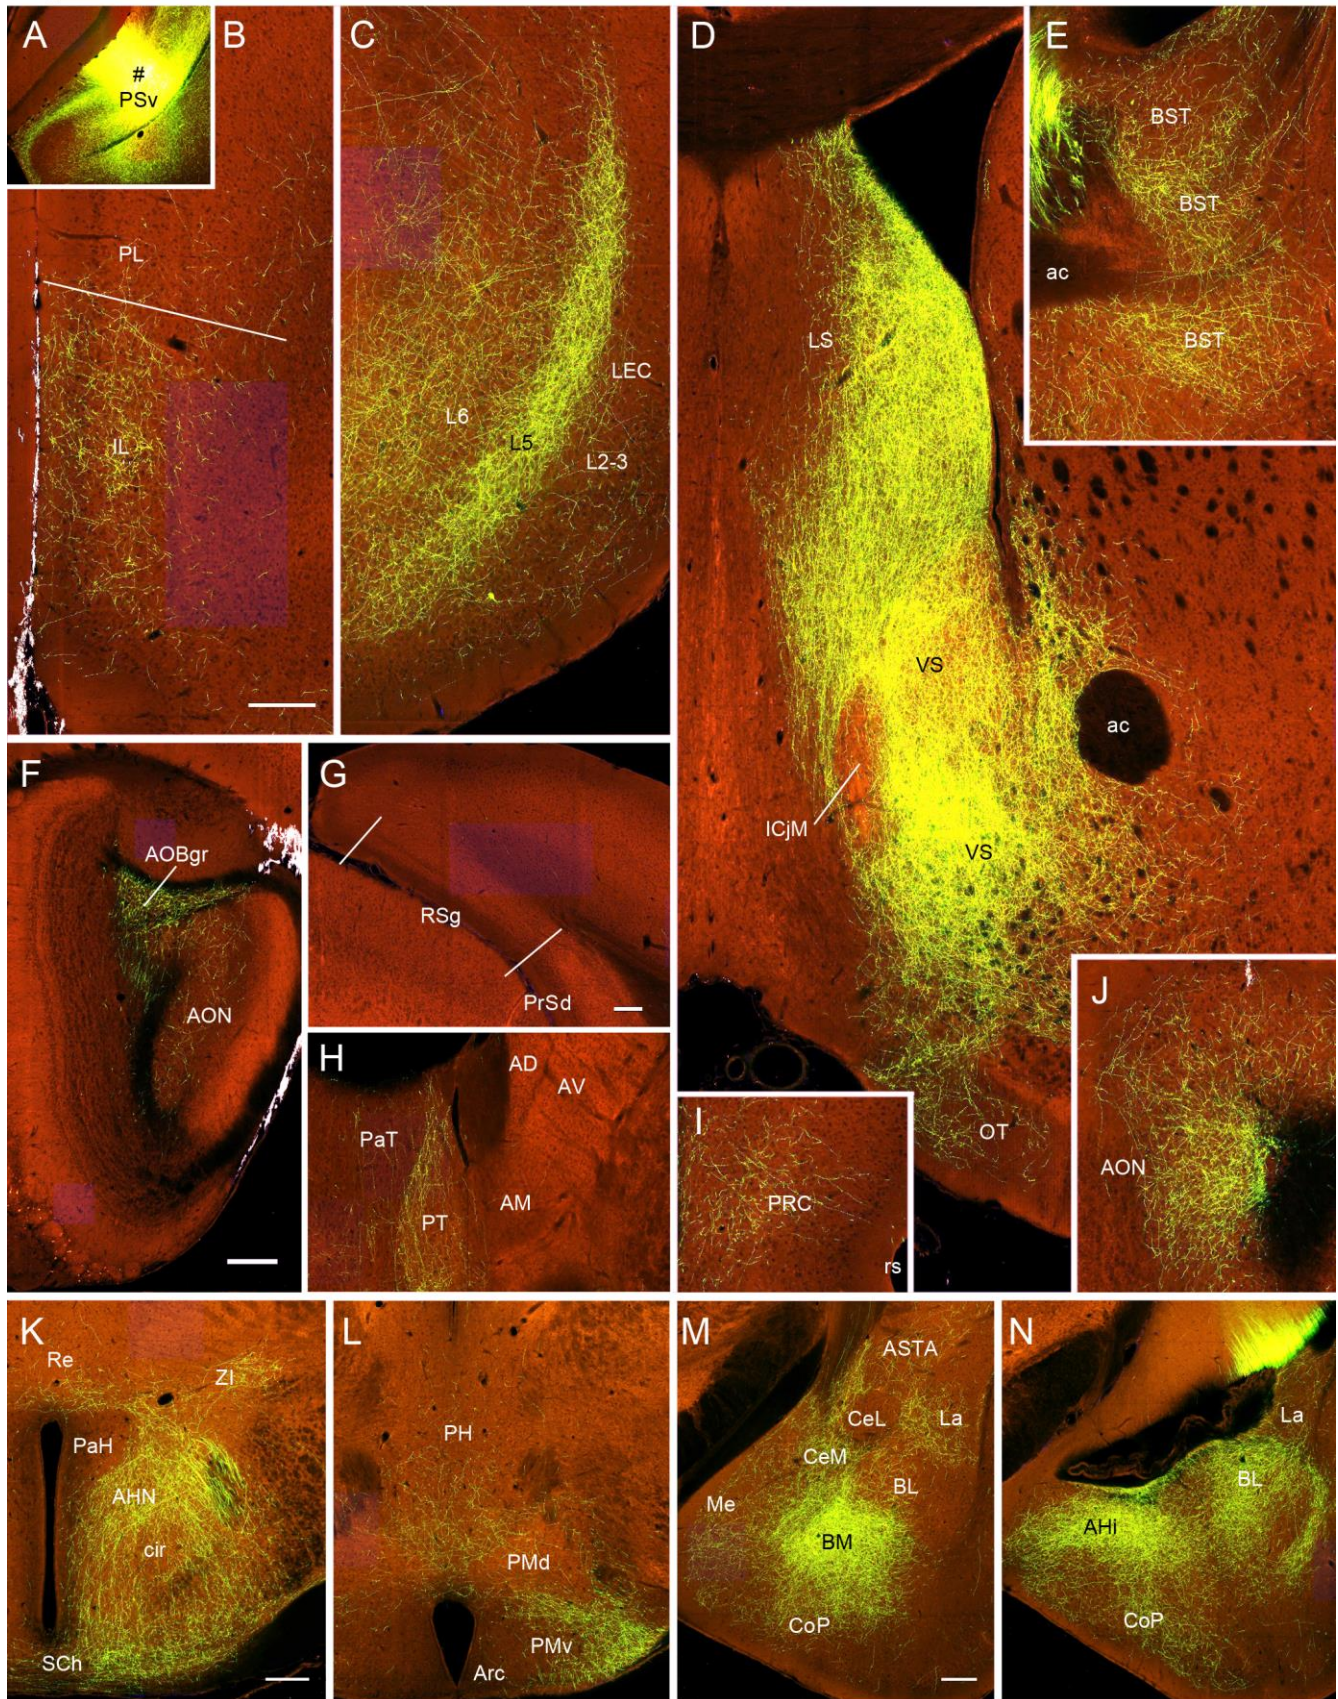

Figure 7

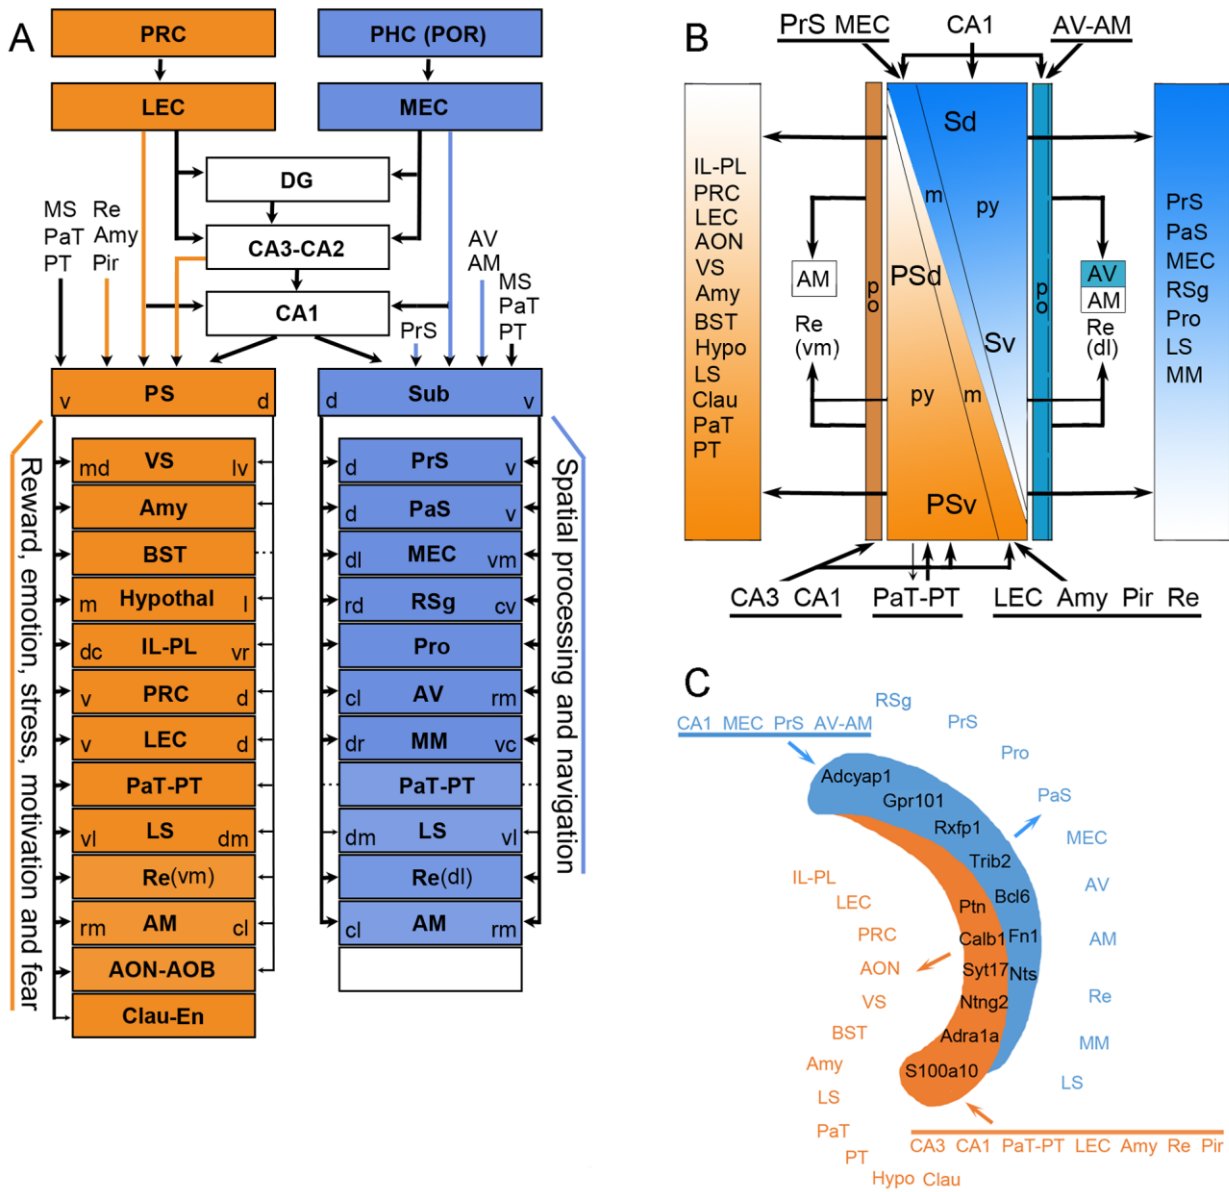

1528  
 1529  
 1530  
 1531  
 1532  
 1533  
 1534  
 1535  
 1536  
 1537  
 1538  
 1539  
 1540  
 1541

Figure S1

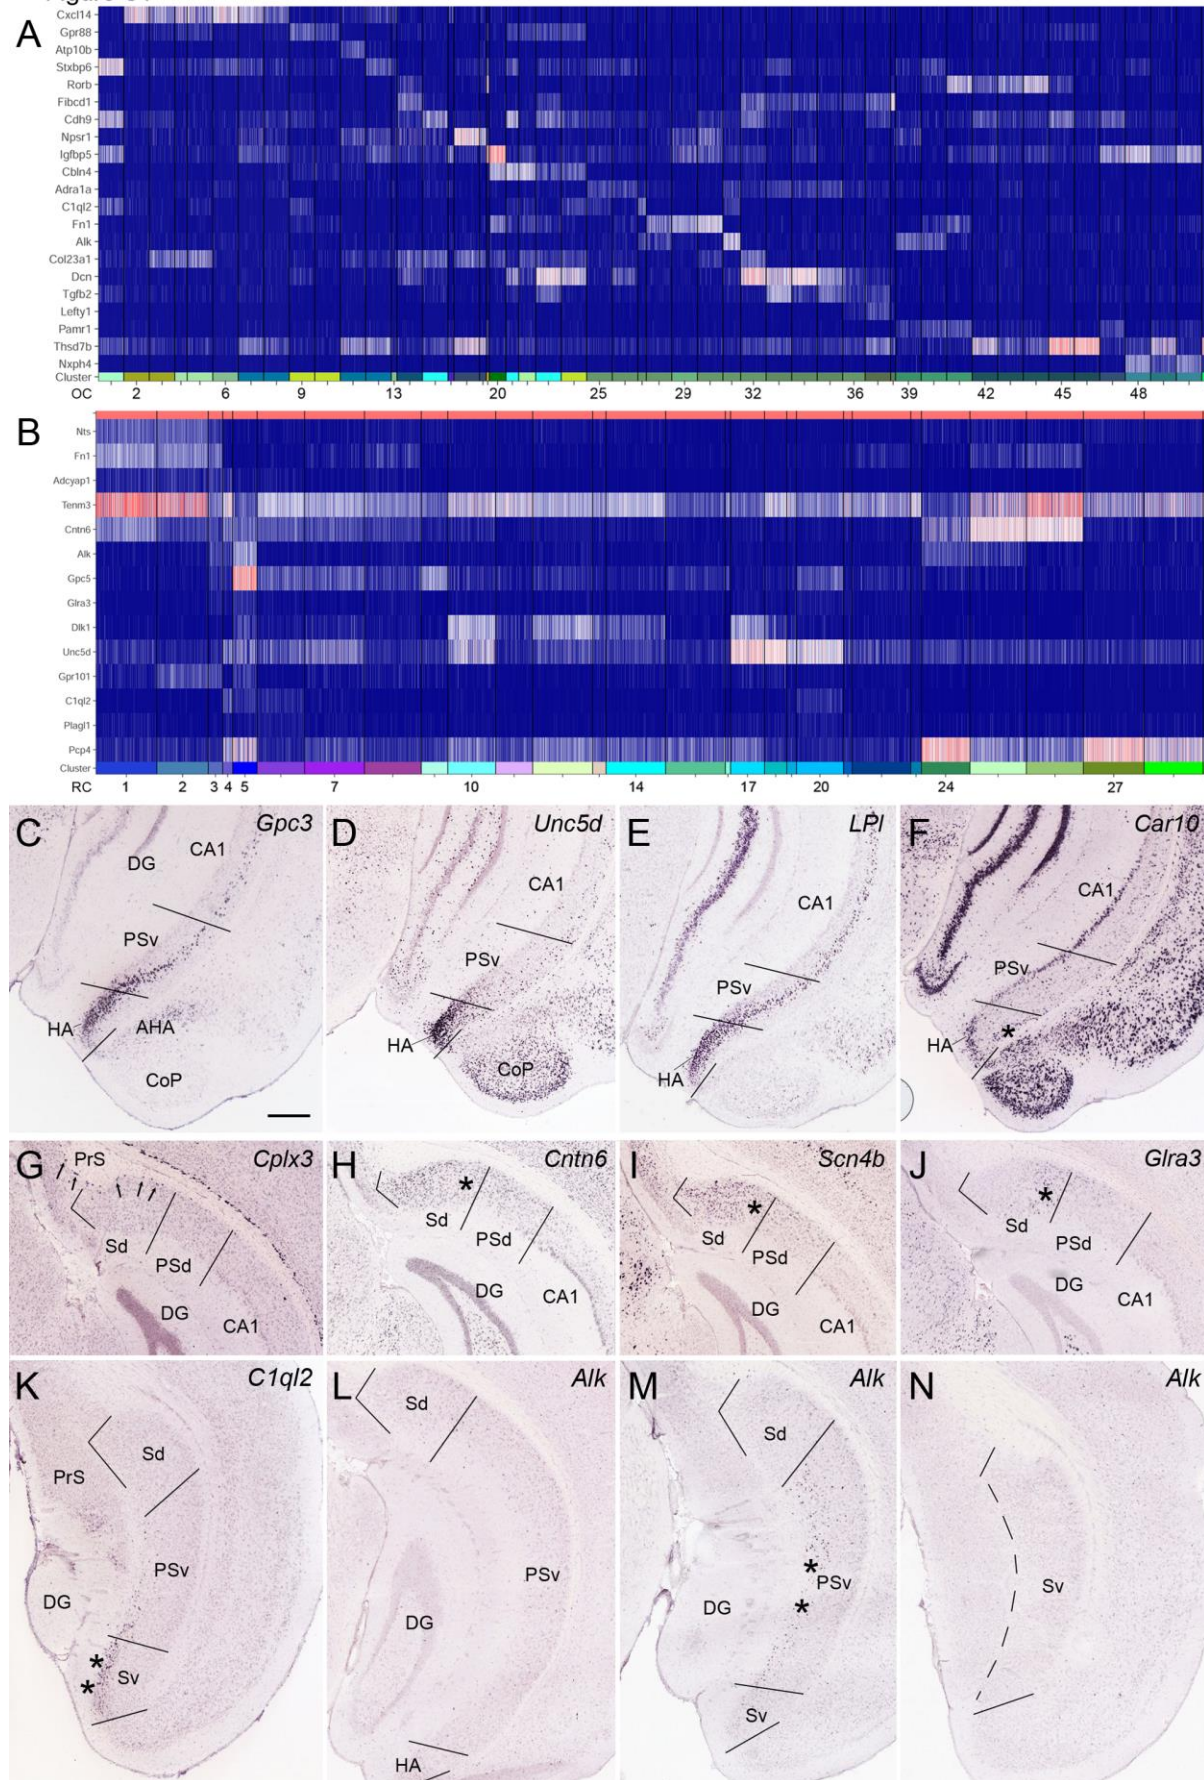



Figure S2

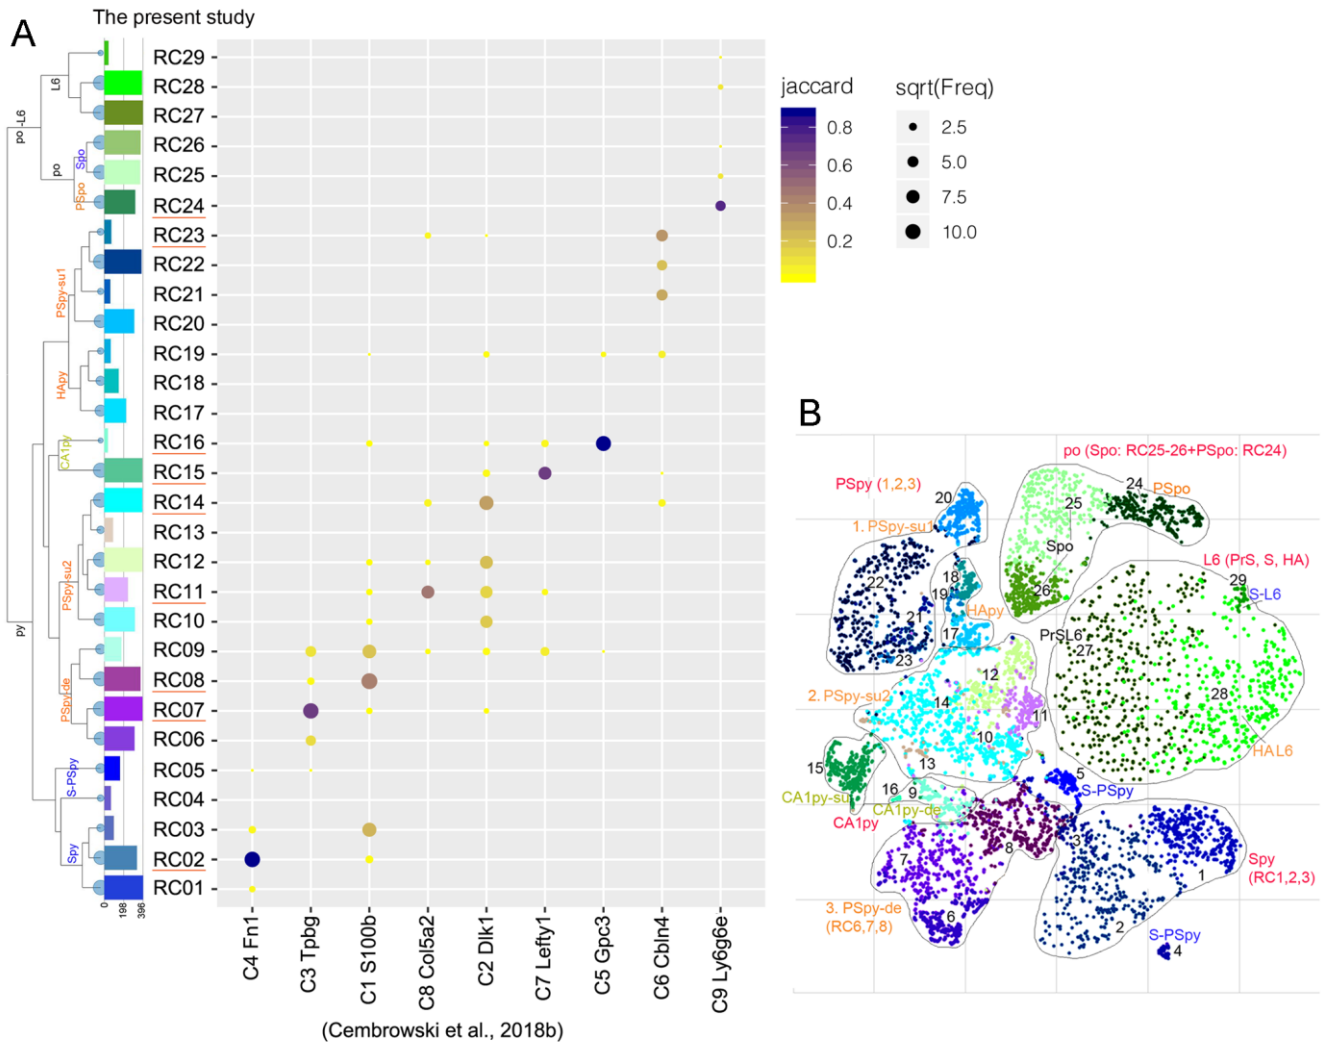

1543  
 1544  
 1545  
 1546  
 1547  
 1548  
 1549  
 1550  
 1551  
 1552  
 1553  
 1554  
 1555  
 1556  
 1557  
 1558  
 1559  
 1560

Figure S3

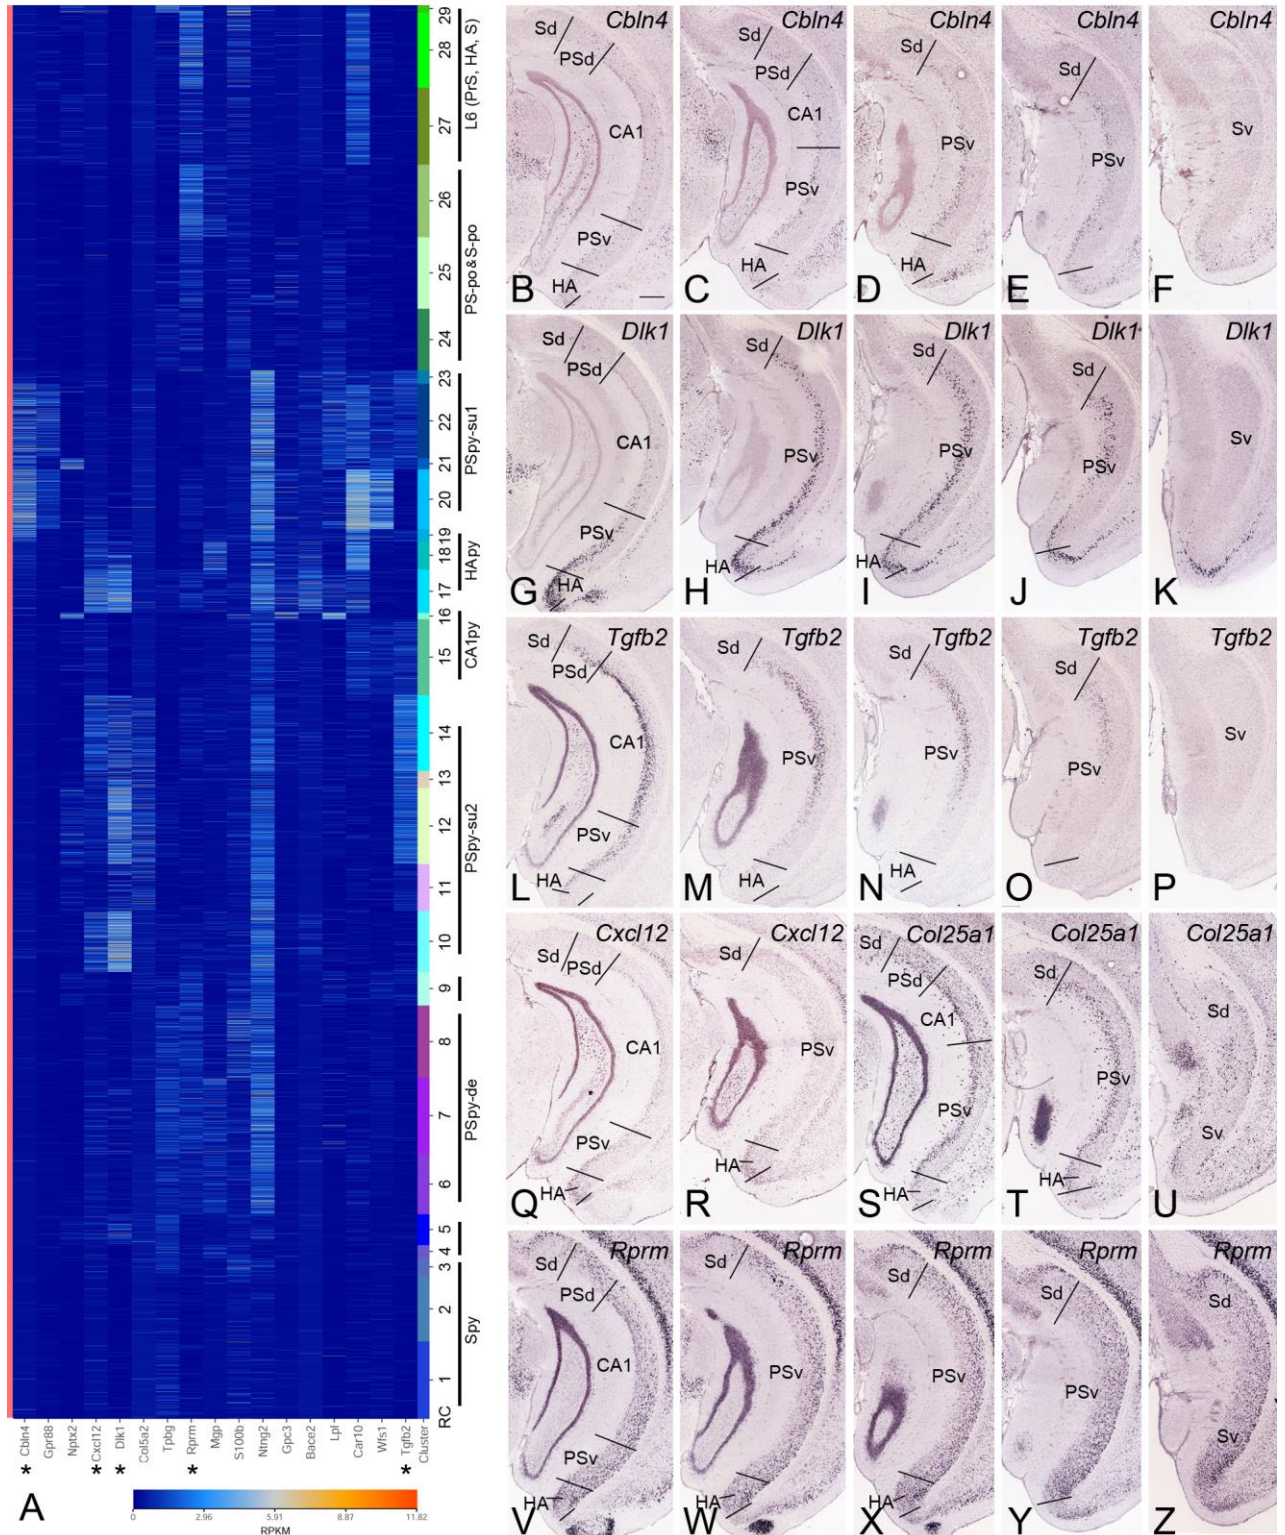

1561  
1562  
1563  
1564  
1565  
1566  
1567

Figure S4

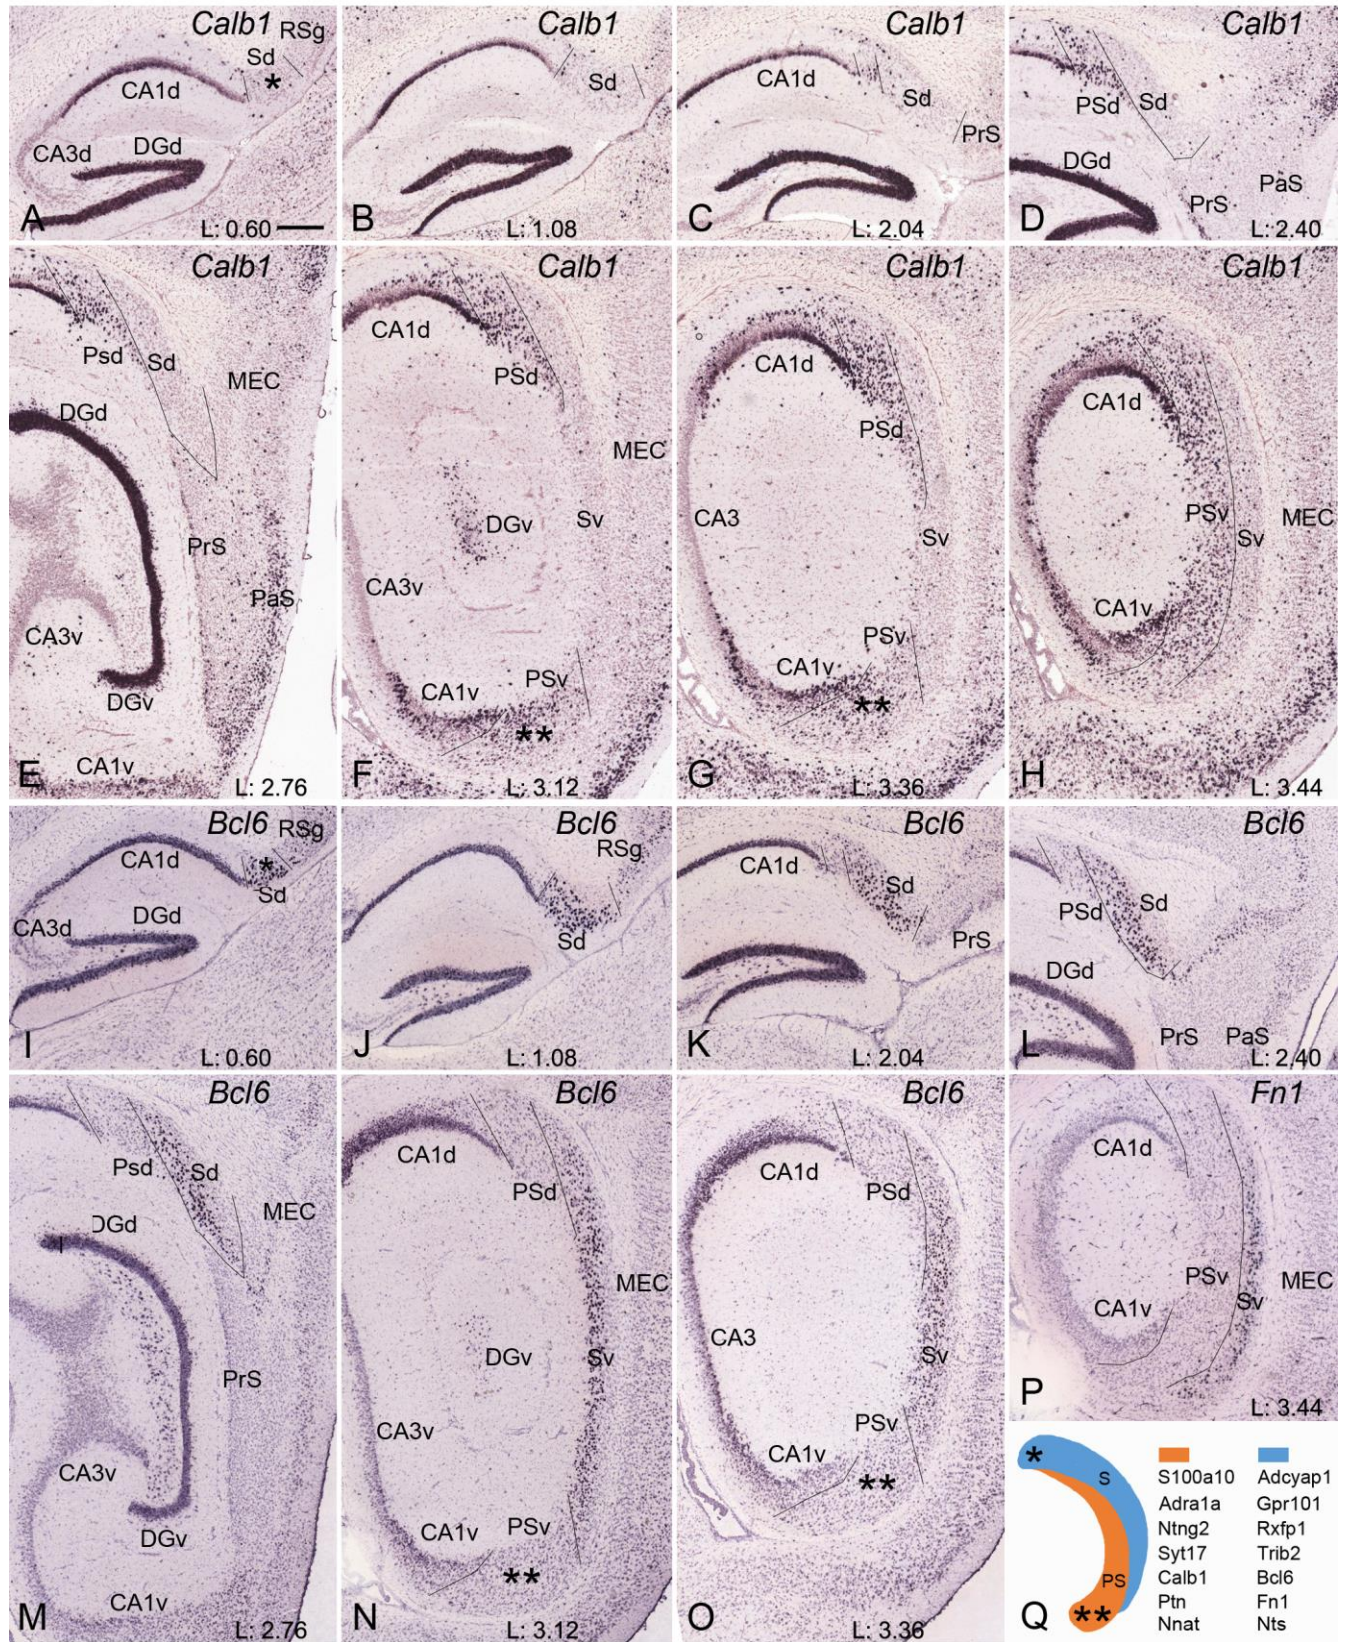

1568  
1569  
1570

Figure S5

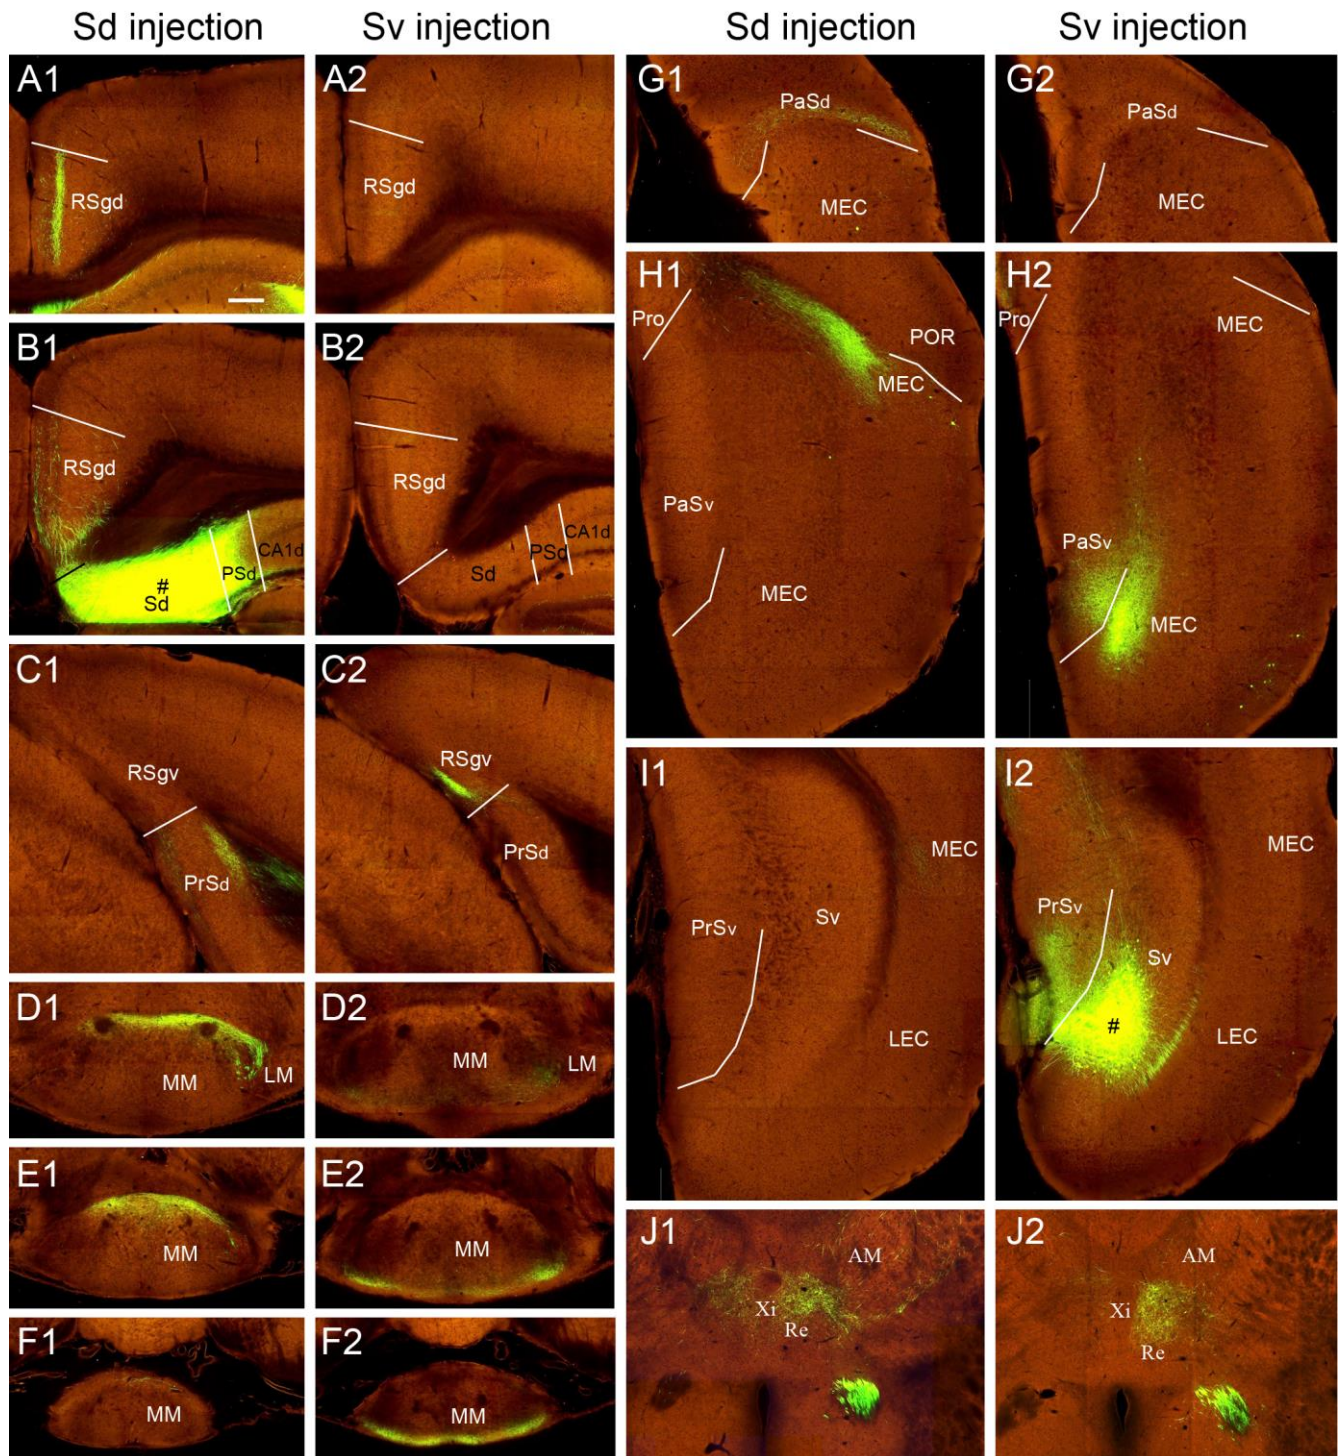

1571  
1572  
1573  
1574  
1575  
1576  
1577  
1578

Figure S6

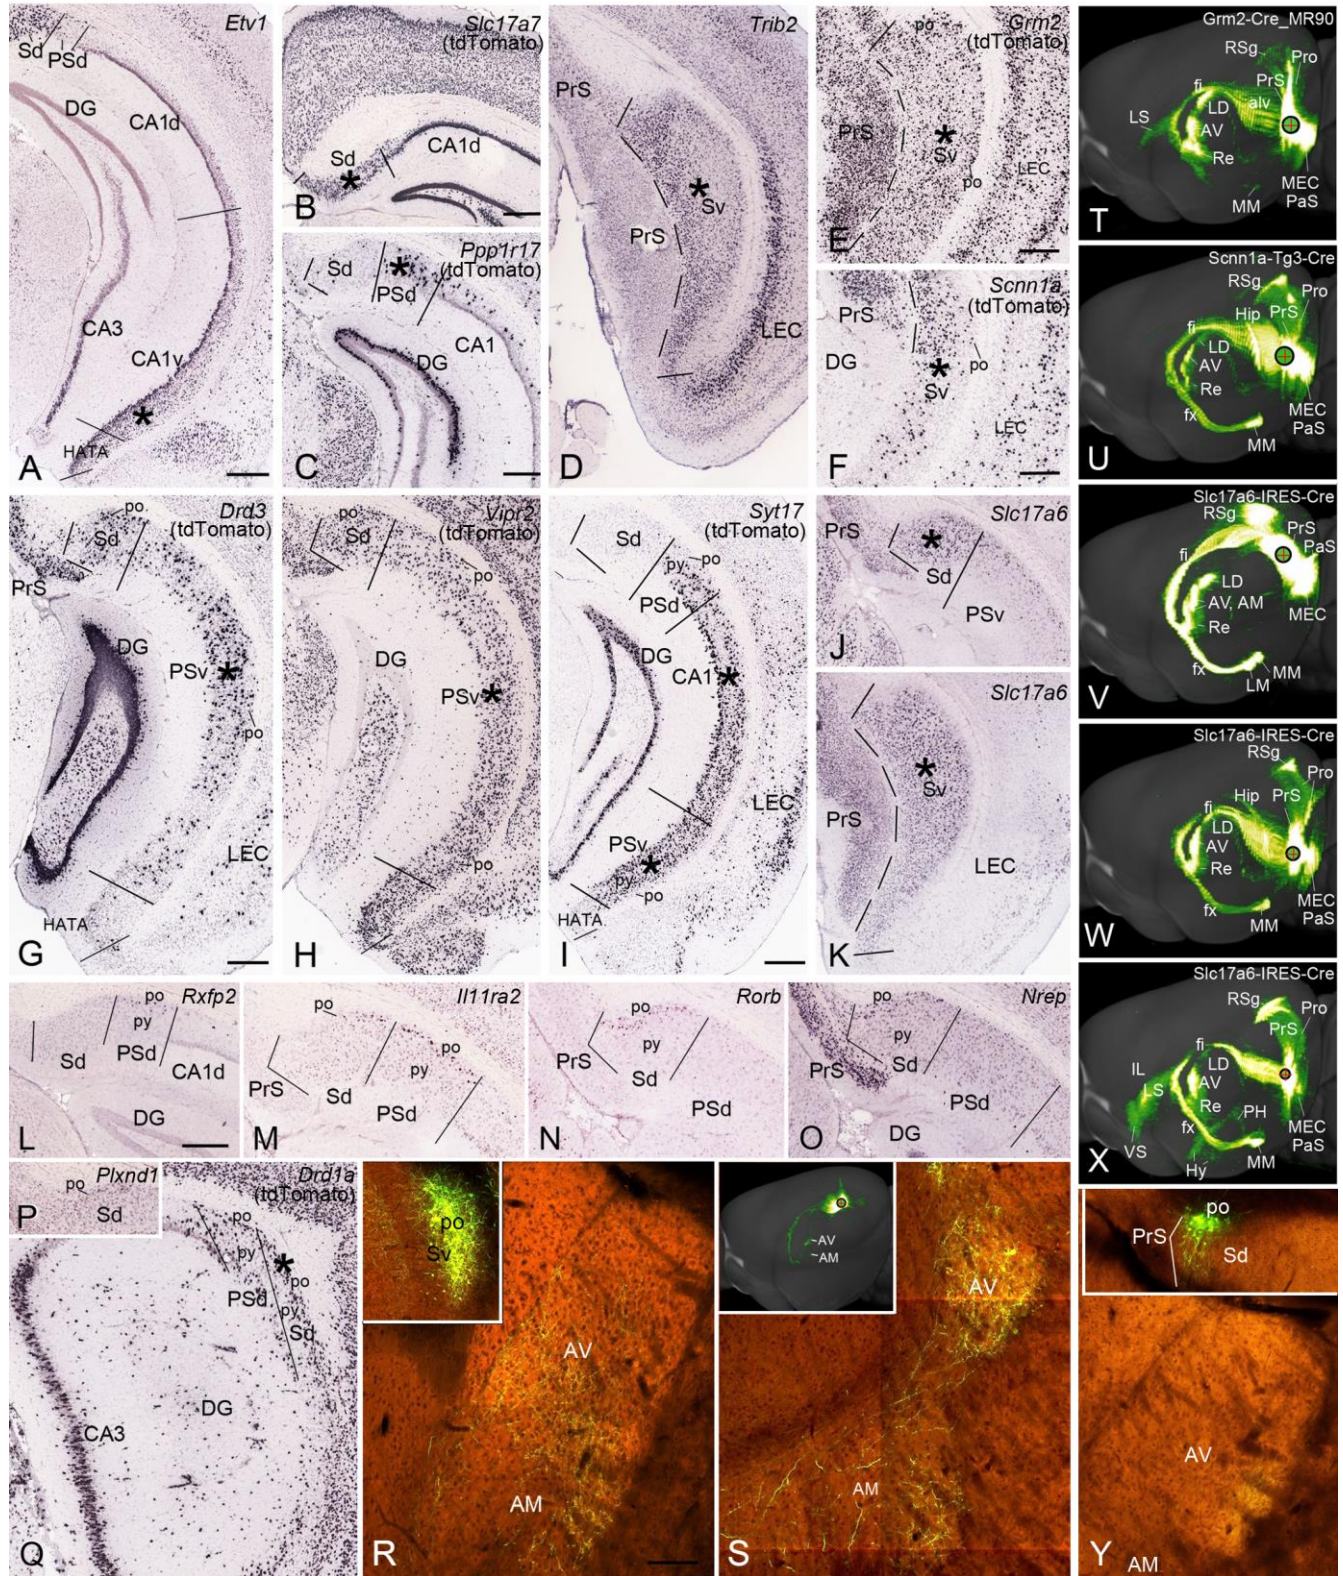

1579  
1580  
1581  
1582  
1583

Figure S7

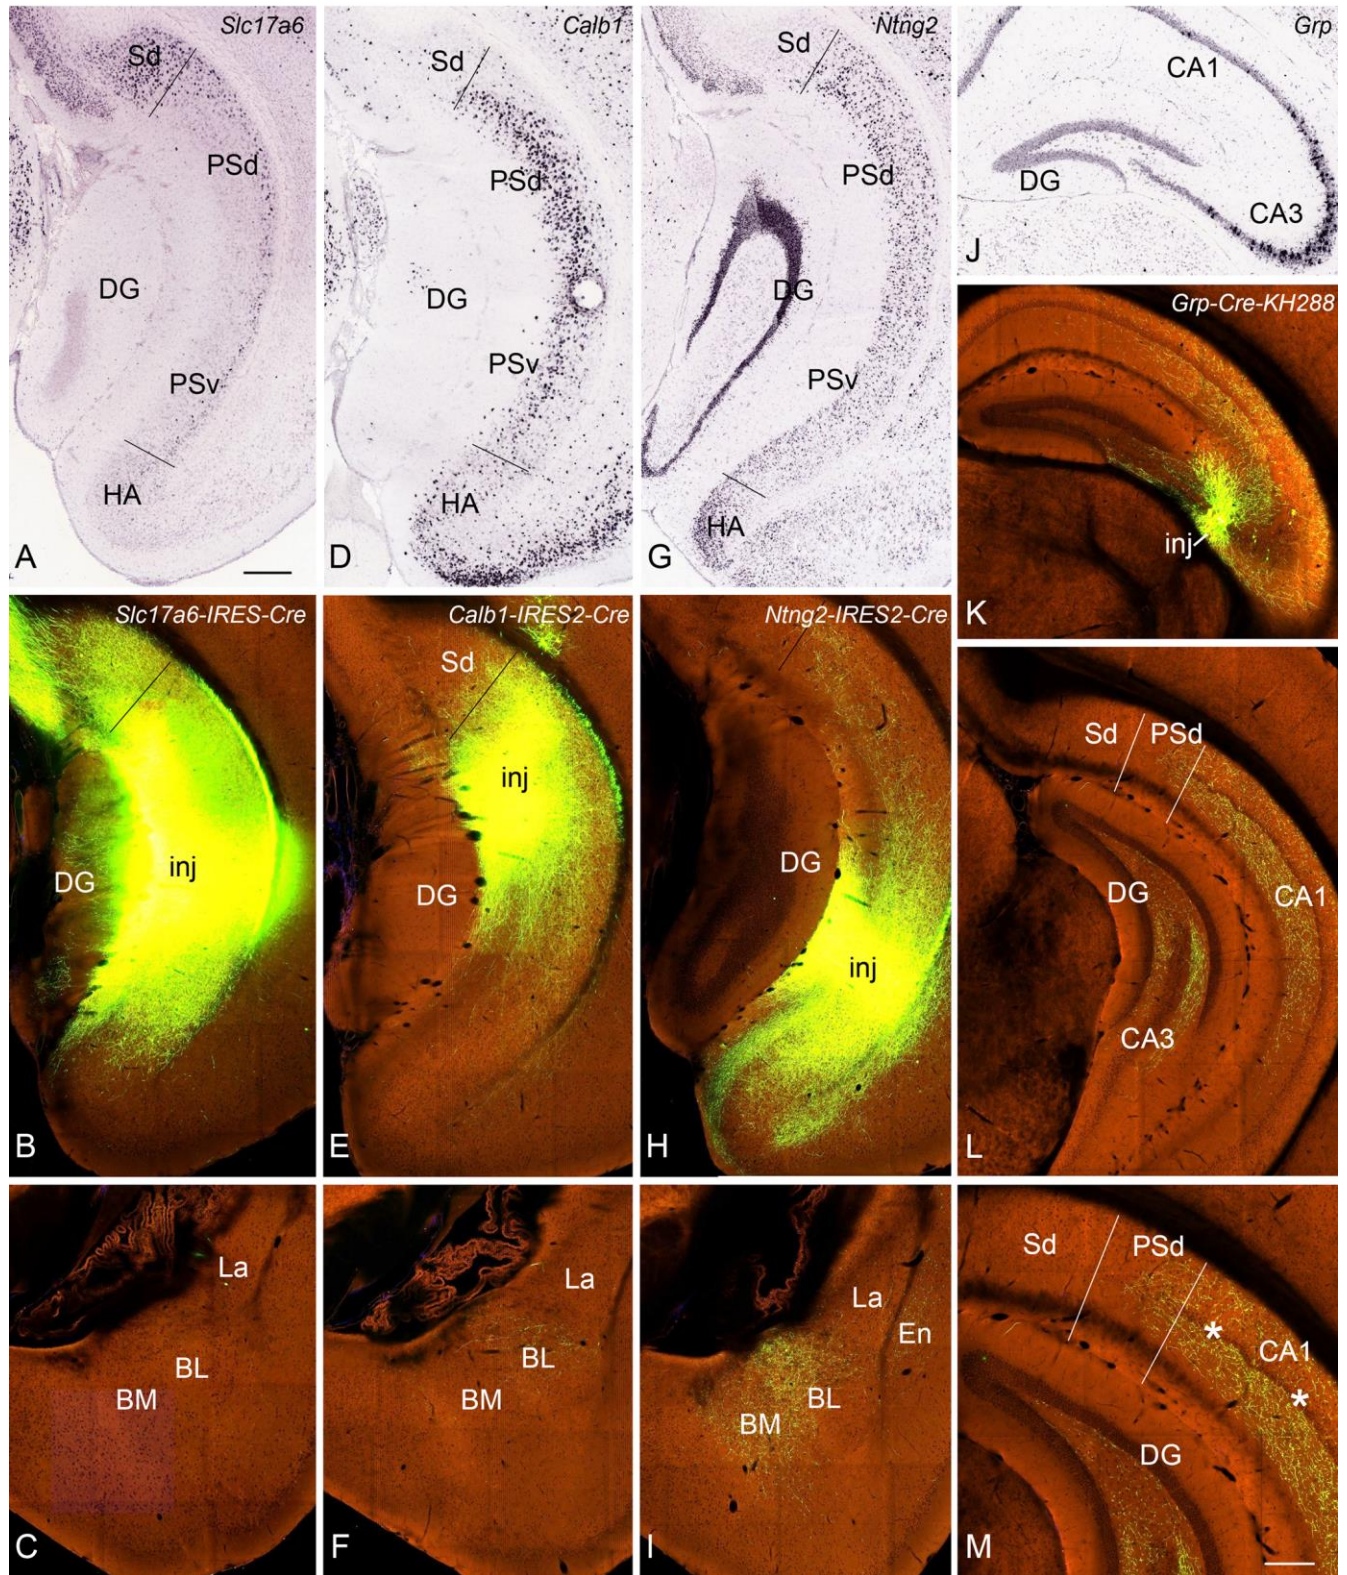

1584  
1585  
1586  
1587  
1588

Figure S8

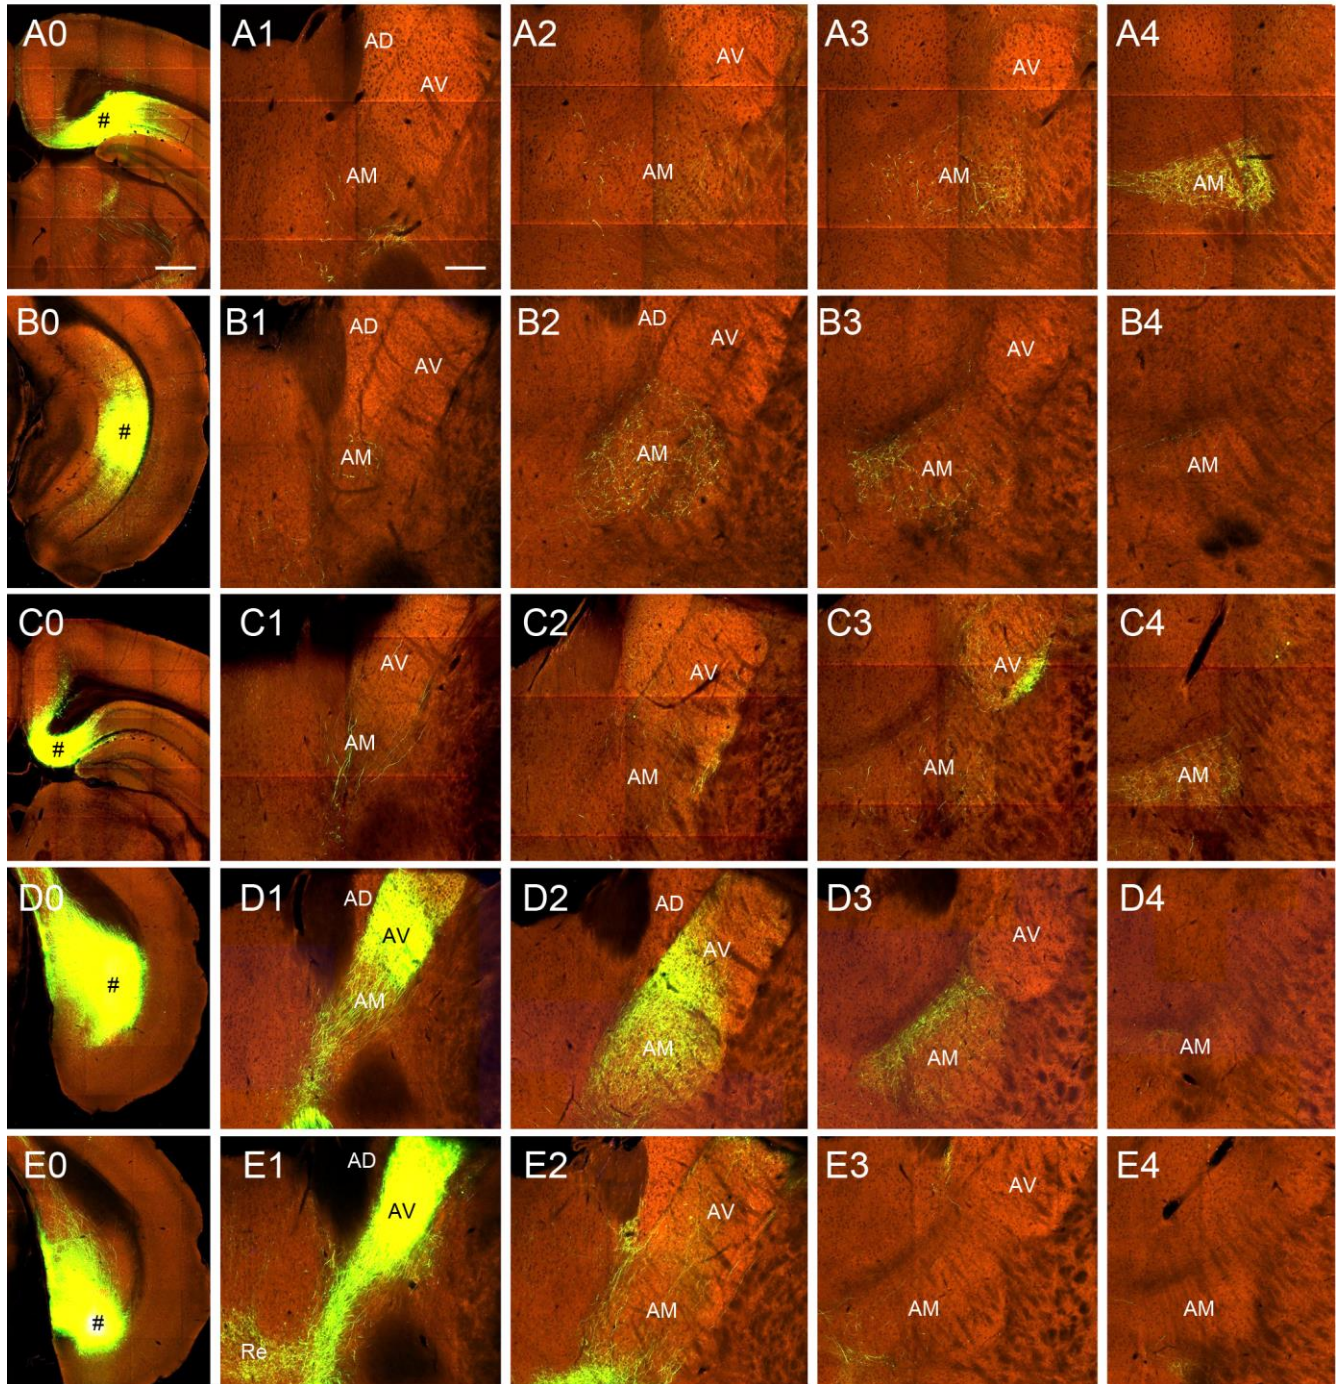

1589  
1590  
1591  
1592  
1593  
1594  
1595  
1596  
1597  
1598

Figure S9

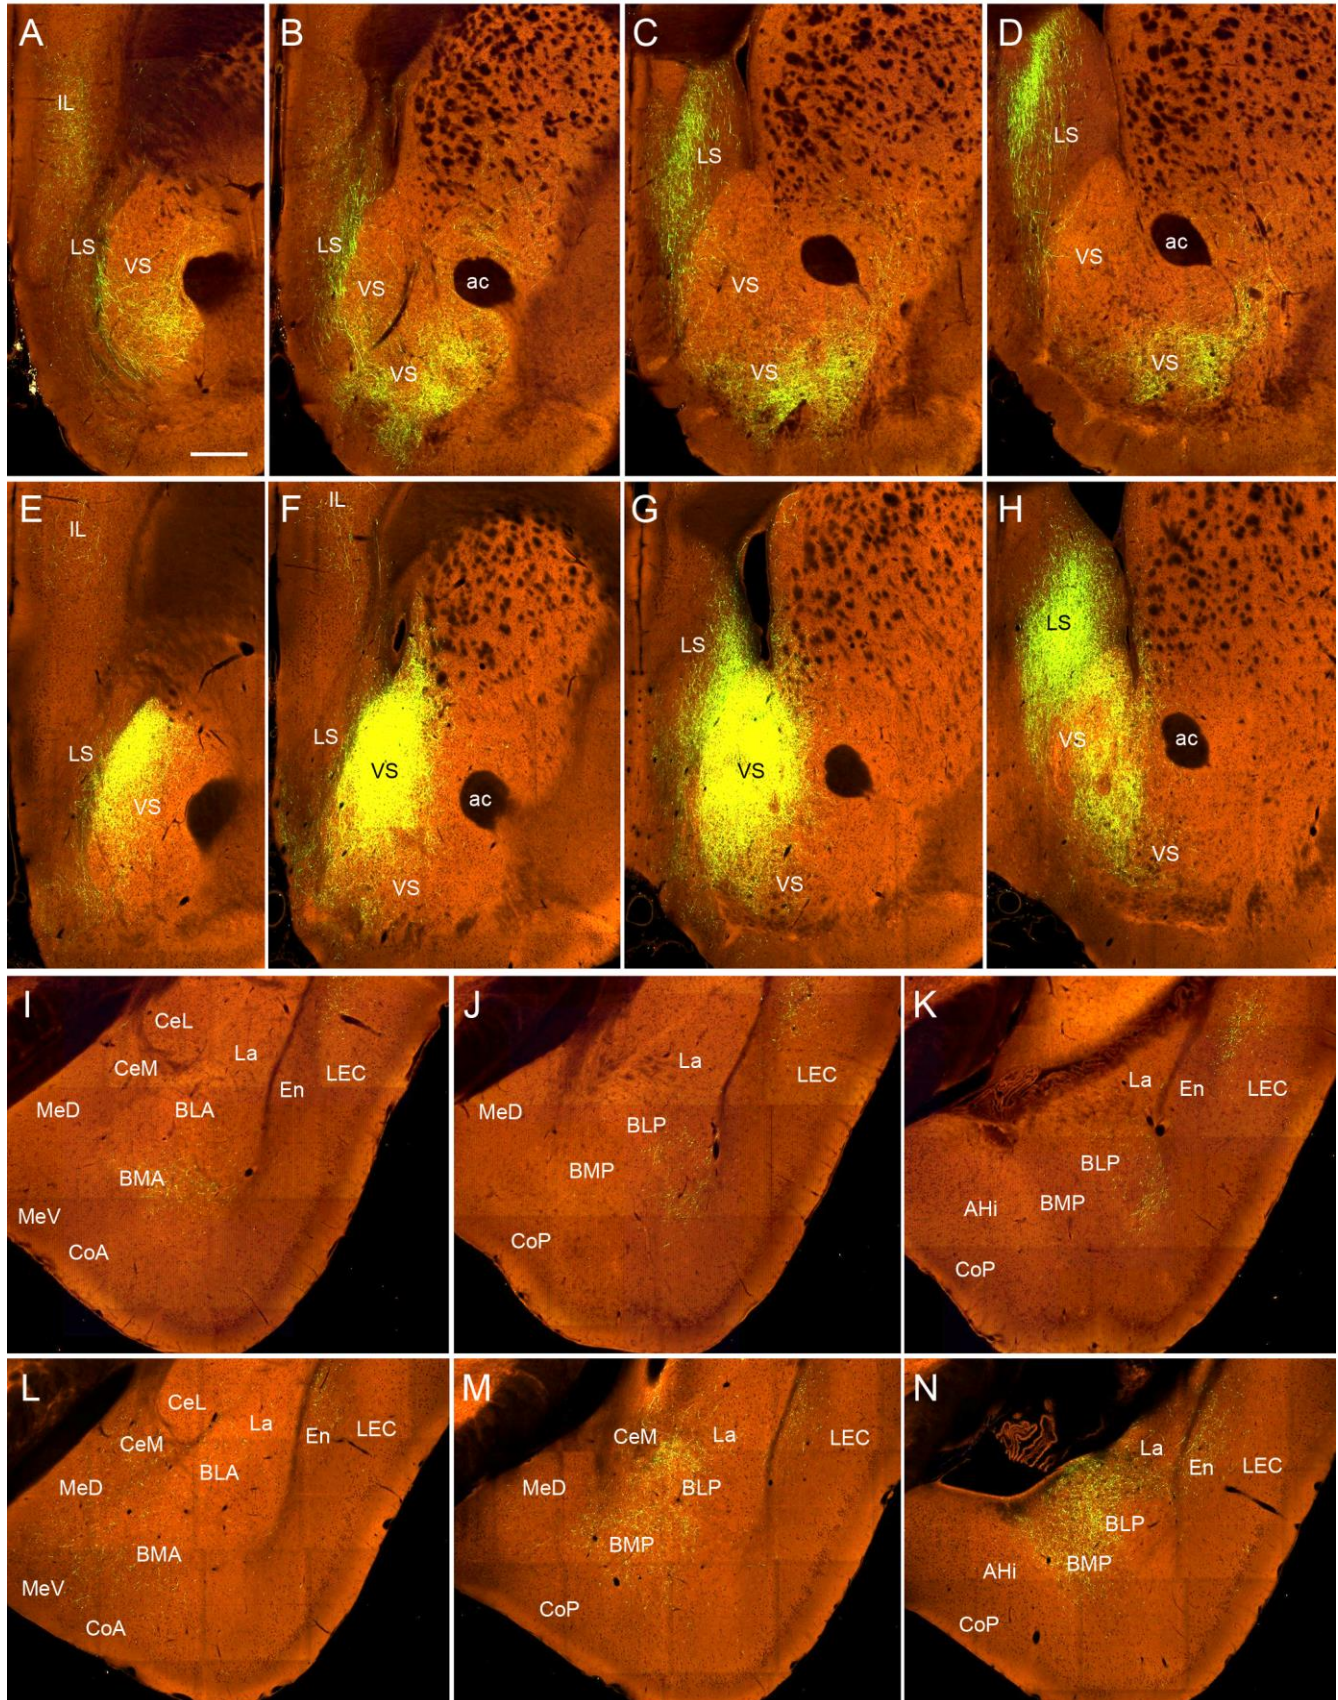



Figure S10

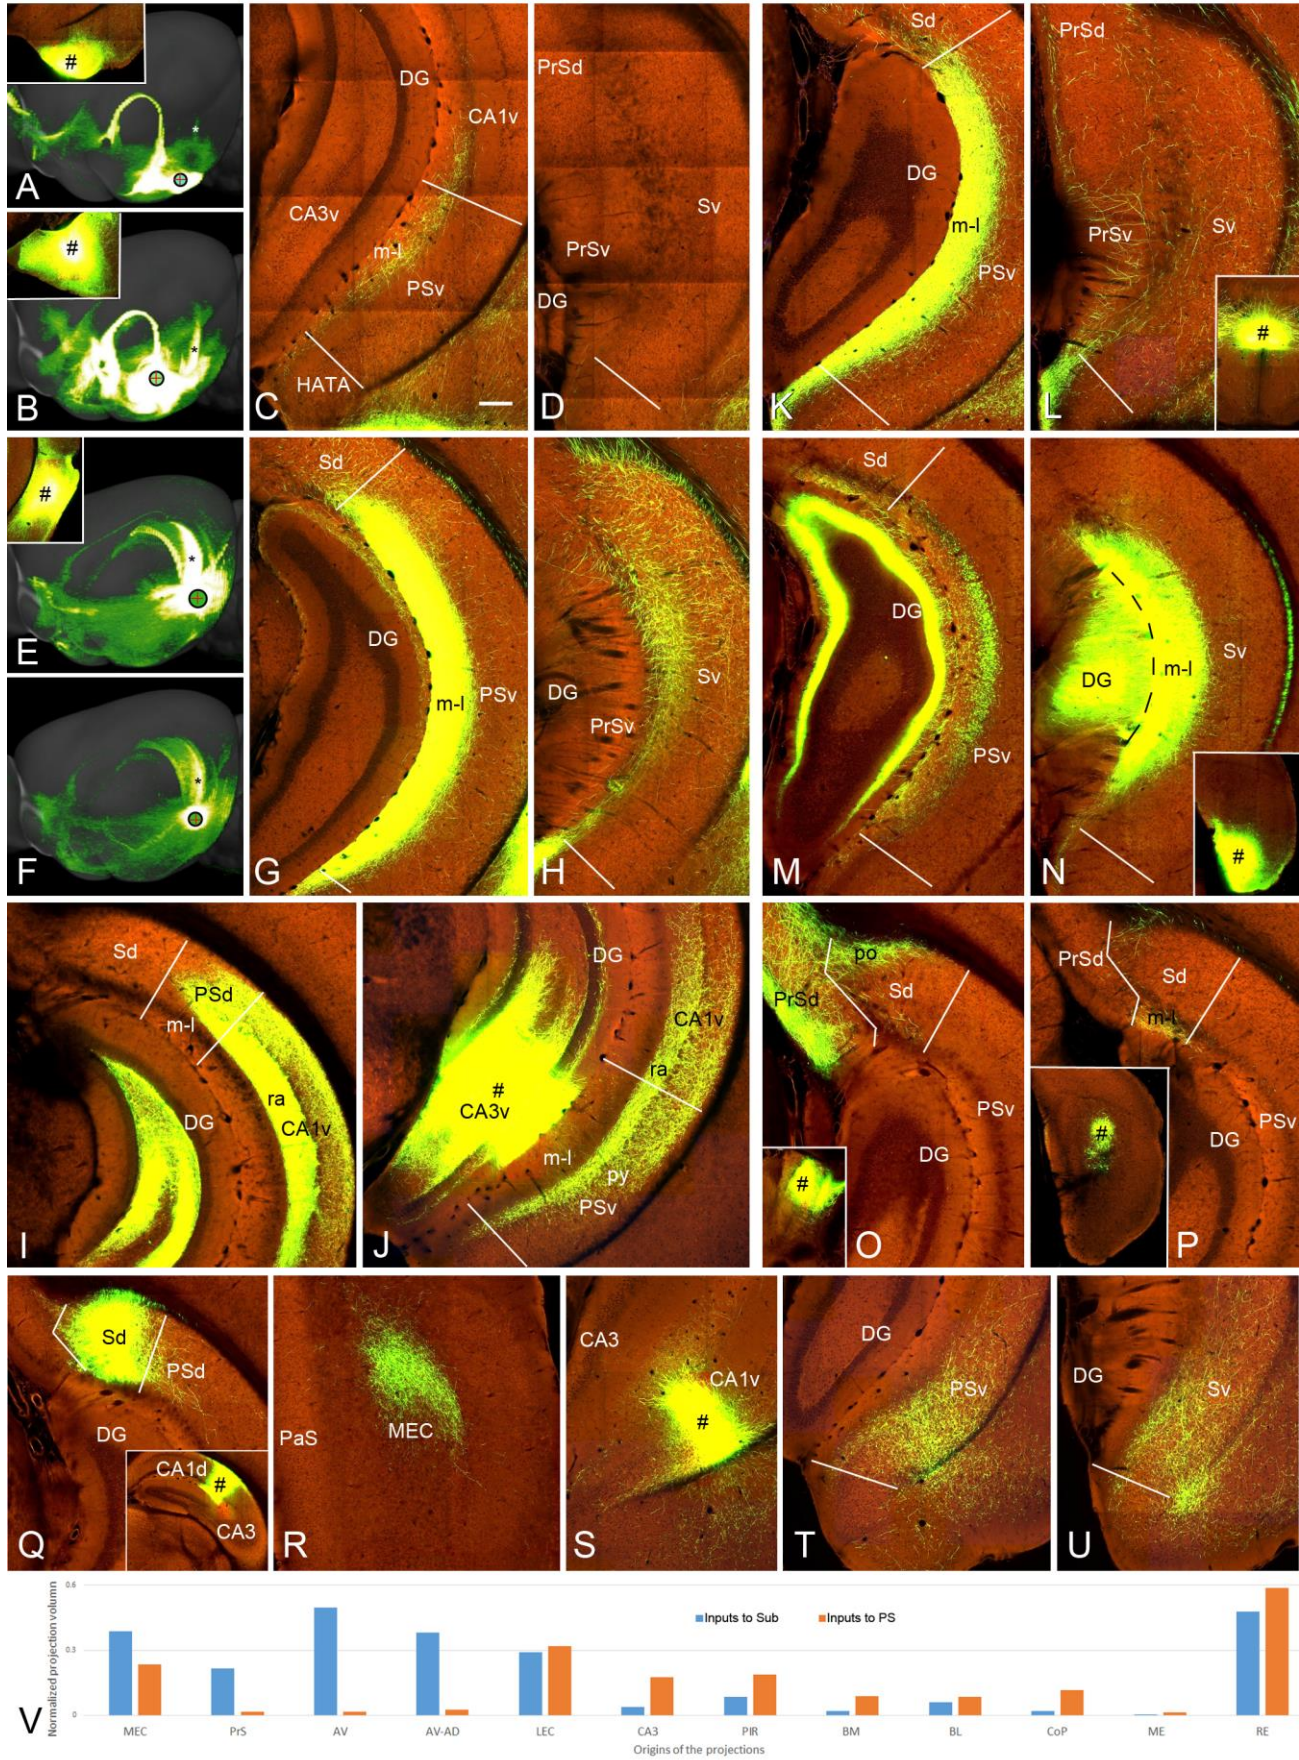

Figure S11

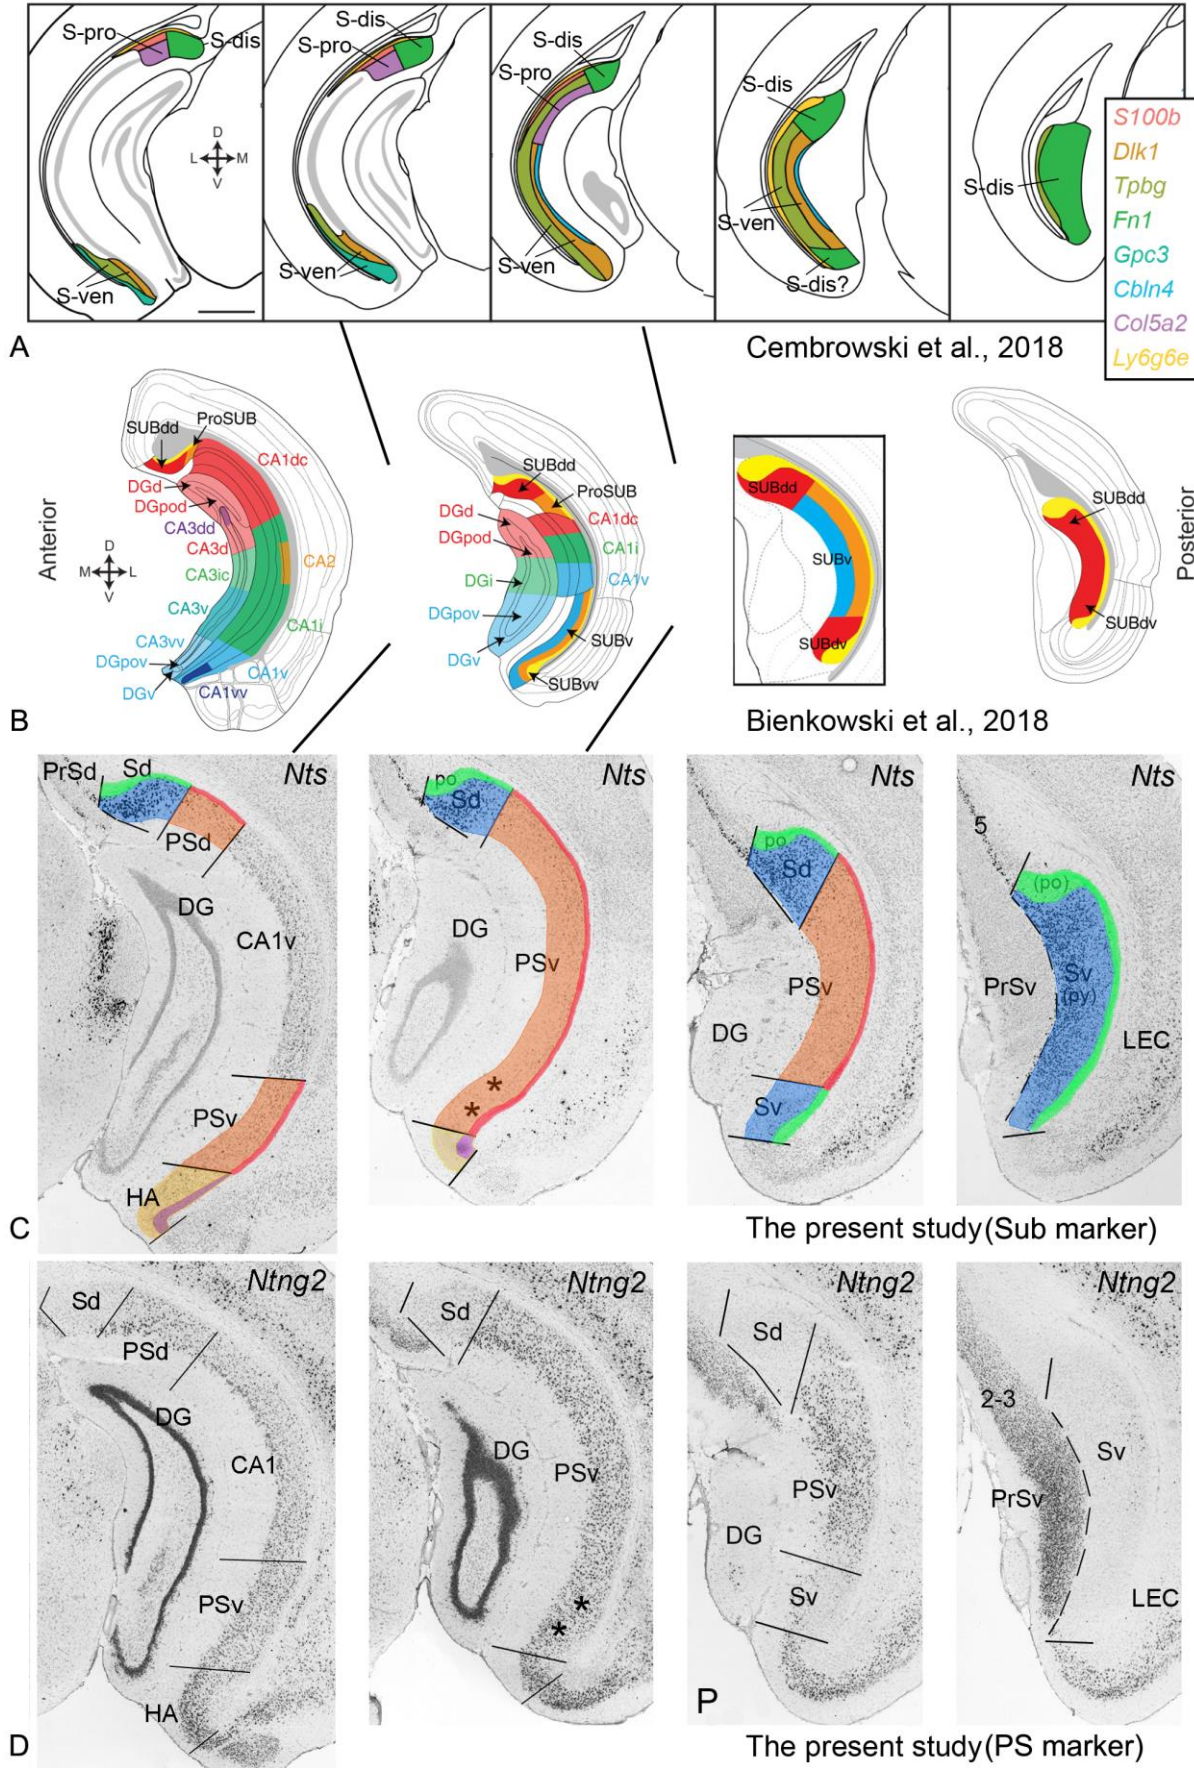

Source: https://www.biorxiv.org/content/biorxiv/early/2019/12/15/2019.12.14.876516.full.pdf
